# Supplementary material
Source: PubMed Central journal article supplement (PMC3259753)

**Supplemental data Figure 1. Clustal W alignment of 142 ferrochelatase primary sequences retrieved from the public database.**

CLUSTAL W (1.83) multiple sequence alignment

```

sp|P42043|HEMH1_ARATH      MQATAL-SSGFN-----PLTKRKDHRFPRSCSQRNLSLSLIQCD----- 37
sp|P42044|HEMH_CUCSA      MDAASS-SLALSNIKLGSTNTLNSDQRISSLCSLPKSRVTFSCKTSGNL 49
sp|P42045|HEMH_HORVU      MECVRSGALDLGR-----SGNFLGKSGSTTSCGKVR CSTNLAGSTKCEQ 44
sp|O04921|HEMH2_ARATH     -----MNC PAMTAS P S S S S S S S S Y S T F R P P P P L L P Q L S N 33
sp|O22101|HEMH_ORYSA     -----N S S R V N L S R T Y A I K S C S V S S R T G - L C L G Q C Y H 31
sp|Q8YQR8|HEMH_ANASP     -----
sp|P54225|HEMH_SYNY3     -----
sp|Q8DGU6|HEMH_SYNEL     -----
sp|Q7VD58|HEMH_PROMA     -----
sp|Q7V2F5|HEMH_PROMP     -----
sp|Q7V6C6|HEMH_PROMM     -----
sp|Q7U5G0|HEMH_SYN PX     -----
sp|Q7NMC7|HEMH_GLOVI     -----
sp|Q9ZC84|HEMH_RICPR     -----
sp|Q68VM9|HEMH_RICTY     -----
sp|Q92FV4|HEMH_RICCN     -----
sp|Q73FY6|HEMH_WOLPM     -----
sp|P57777|HEMH_CAUCR     -----
sp|O67083|HEMH_AQUAE     -----
sp|P22830|HEMH_HUMAN     -----M 1
sp|P22315|HEMH_MOUSE     -----M 1
sp|P22600|HEMH_BOVIN     -----
sp|O42479|HEMH_CHICK     -----
sp|O57478|HEMH_XENLA     -----
sp|Q9V9S8|HEMH_DROME     -----
sp|O59786|HEMH_SCHPO     -----
sp|P16622|HEMH_YEAST     -----
sp|Q6APB0|HEMH_DESPS     -----
sp|Q747F5|HEMH_GEOSL     -----
sp|Q9ZKD4|HEMH_HELPJ     -----
sp|P56107|HEMH_HELPY     -----
sp|Q7M7P9|HEMH_WOLSU     -----
sp|Q7VHH1|HEMH_HELHP     -----
sp|Q9PI08|HEMH_CAMJE     -----
sp|Q8DFM2|HEMH_VIBVU     -----
sp|Q7MMR4|HEMH_VIBVY     -----
sp|Q9KTB6|HEMH_VIBCH     -----
sp|Q87RH3|HEMH_VIBPA     -----
sp|Q6LTE0|HEMH_PHOPR     -----
sp|Q8EFF4|HEMH1_SHEON     -----
sp|Q8XD39|HEMH_ECO57     -----
sp|P23871|HEMH_ECOLI     -----
sp|Q8FK83|HEMH_ECOL6     -----
sp|Q83SE5|HEMH_SHIFL     -----
sp|Q8Z8T2|HEMH_SALTI     -----
sp|P37408|HEMH_SALTY     -----
sp|Q8ZC98|HEMH_YERPE     -----
sp|Q05338|HEMH_YERPS     -----
sp|P43413|HEMH_YEREN     -----
sp|Q6D7Z4|HEMH_ERWCT     -----
sp|Q7N0P6|HEMH_PHOLL     -----
sp|P43868|HEMH_HAEIN     -----
sp|P57874|HEMH_PASMU     -----
sp|Q65SV7|HEMH_MANSM     -----
sp|Q8CWW4|HEMH_STRMU     -----
sp|Q8D226|HEMH_WIGBR     -----
sp|Q8EBZ7|HEMH2_SHEON     -----

```

|    |        |             |       |
|----|--------|-------------|-------|
| sp | Q6F7N0 | HEMH_ACIAD  | ----- |
| sp | Q7WGI0 | HEMH_BORBR  | ----- |
| sp | Q7W515 | HEMH_BORPA  | ----- |
| sp | Q7VVX8 | HEMH_BORPE  | ----- |
| sp | Q62HD1 | HEMH_BURMA  | ----- |
| sp | Q63R43 | HEMH_BURPS  | ----- |
| sp | Q8XW32 | HEMH_RALSO  | ----- |
| sp | Q7NV65 | HEMH_CHRVO  | ----- |
| sp | Q82UK8 | HEMH_NITEU  | ----- |
| sp | Q9JVA5 | HEMH_NEIMA  | ----- |
| sp | Q9K097 | HEMH_NEIMB  | ----- |
| sp | Q8PEX0 | HEMH_XANAC  | ----- |
| sp | Q8P3H6 | HEMH_XANCP  | ----- |
| sp | Q9PFU1 | HEMH_XYLFA  | ----- |
| sp | Q87B82 | HEMH_XYLFT  | ----- |
| sp | Q607T4 | HEMH_METCA  | ----- |
| sp | Q8U9F7 | HEMH_AGRT5  | ----- |
| sp | Q92M52 | HEMH_RHIME  | ----- |
| sp | Q93TG2 | HEMH_BRUME  | ----- |
| sp | Q98H61 | HEMH_RHILO  | ----- |
| sp | P28602 | HEMH_BRAJA  | ----- |
| sp | Q6NBF3 | HEMH_RHOPA  | ----- |
| sp | Q59735 | HEMH_RHOCA  | ----- |
| sp | P57779 | HEMH_ZYMMO  | ----- |
| sp | Q833G5 | HEMH_ENTFA  | ----- |
| sp | Q9CFB4 | HEMH_LACLA  | ----- |
| sp | Q67T48 | HEMH_SYMTH  | ----- |
| sp | Q88XC3 | HEMH_LACPL  | ----- |
| sp | P57778 | HEMH_PSEFL  | ----- |
| sp | Q888A2 | HEMH_PSESM  | ----- |
| sp | Q88PV4 | HEMH_PSEPK  | ----- |
| sp | Q9HVD7 | HEMH_PSEAE  | ----- |
| sp | Q6MHT3 | HEMH_BDEBA  | ----- |
| sp | Q83FA4 | HEMH_COXBU  | ----- |
| sp | Q6MAW8 | HEMH_PARUW  | ----- |
| sp | Q7MXP4 | HEMH_PORGI  | ----- |
| sp | Q824K8 | HEMH_CHLCV  | ----- |
| sp | Q9Z7V1 | HEMH_CHLPN  | ----- |
| sp | Q9PJQ6 | HEMH_CHLMU  | ----- |
| sp | O84492 | HEMH_CHLTR  | ----- |
| sp | Q8GCV0 | HEMH_LEPBI  | ----- |
| sp | Q81U22 | HEMH1_BACAN | ----- |
| sp | Q6HM97 | HEMH1_BACHK | ----- |
| sp | Q63ES4 | HEMH1_BACCZ | ----- |
| sp | Q73C98 | HEMH1_BACCL | ----- |
| sp | Q81GW5 | HEMH1_BACCR | ----- |
| sp | P32396 | HEMH_BACSU  | ----- |
| sp | Q8ERX9 | HEMH_OCEIH  | ----- |
| sp | Q71XF4 | HEMH_LISMF  | ----- |
| sp | Q8Y565 | HEMH_LISMO  | ----- |
| sp | Q929G2 | HEMH_LISIN  | ----- |
| sp | P64124 | HEMH_STAAM  | ----- |
| sp | P64125 | HEMH_STAAN  | ----- |
| sp | Q6G8A3 | HEMH_STAAS  | ----- |
| sp | P64126 | HEMH_STAAN  | ----- |
| sp | Q6GFM4 | HEMH_STAAR  | ----- |
| sp | Q8CNS1 | HEMH_STAEP  | ----- |
| sp | Q81TU9 | HEMH2_BACAN | ----- |
| sp | Q6HM28 | HEMH2_BACHK | ----- |
| sp | Q63EK7 | HEMH2_BACCZ | ----- |
| sp | Q73C08 | HEMH2_BACCL | ----- |
| sp | Q81GN7 | HEMH2_BACCR | ----- |
| sp | Q9KDK9 | HEMH_BACHD  | ----- |

|    |        |            |       |
|----|--------|------------|-------|
| sp | Q5WHT1 | HEMH_BACSK | ----- |
| sp | Q72L32 | HEMH_THET2 | ----- |
| sp | Q9RV98 | HEMH_DEIRA | ----- |
| sp | Q97R30 | HEMH_STRPN | ----- |
| sp | Q8DQ04 | HEMH_STRR6 | ----- |
| sp | Q8FTB1 | HEMH_COREF | ----- |
| sp | Q8NQA1 | HEMH_CORGL | ----- |
| sp | Q6NH66 | HEMH_CORDI | ----- |
| sp | Q740Y1 | HEMH_MYCPA | ----- |
| sp | P71765 | HEMH_MYCTU | ----- |
| sp | Q9CBM2 | HEMH_MYCLE | ----- |
| sp | Q5YU18 | HEMH_NOCFA | ----- |
| sp | O07401 | HEMH_MYCAV | ----- |
| sp | Q83H94 | HEMH_TROW8 | ----- |
| sp | Q83FJ2 | HEMH_TROWT | ----- |
| sp | Q6AHF2 | HEMH_LEIXX | ----- |
| sp | Q82KJ6 | HEMH_STRAW | ----- |
| sp | O50533 | HEMH_STRCO | ----- |
| sp | Q7UFZ7 | HEMH_RHOBA | ----- |
| sp | P72183 | HEMH_PROFR | ----- |
| sp | Q9HLB8 | HEMH_THEAC | ----- |
| sp | Q978U9 | HEMH_THEVO | ----- |

|    |        |             |                                                     |    |
|----|--------|-------------|-----------------------------------------------------|----|
| sp | P42043 | HEMH1_ARATH | - IKERSFGESMTITN-----RGLSF----KTNVFEQARSV-TGDCS     | 72 |
| sp | P42044 | HEMH_CUCSA  | QVRDRSTGLVVSCSSSNGDRDVIQGLHLSPGPIEKKSRLGQACCS-VGTFT | 98 |
| sp | P42045 | HEMH_HORVU  | NLHGKAKPLLLSASGKARG--TSGLVHRSPVLKHQHHLRSTSTDVCT     | 91 |
| sp | O04921 | HEMH2_ARATH | DSQRSVVMHCTRLPFEAFAATSSNRLGKHSPLRAALVTSNPLNISSSS    | 83 |
| sp | O22101 | HEMH_ORYSA  | K--KSSACRCK-----LGWSSQPLSSLRHHLRVHSSASEA            | 64 |
| sp | Q8YQR8 | HEMH_ANASP  | -----                                               |    |
| sp | P54225 | HEMH_SYNY3  | -----                                               |    |
| sp | Q8DGU6 | HEMH_SYNEL  | -----                                               |    |
| sp | Q7VD58 | HEMH_PROMA  | -----                                               |    |
| sp | Q7V2F5 | HEMH_PROMP  | -----                                               |    |
| sp | Q7V6C6 | HEMH_PROMM  | -----                                               |    |
| sp | Q7U5G0 | HEMH_SYNPX  | -----                                               |    |
| sp | Q7NMC7 | HEMH_GLOVI  | -----                                               |    |
| sp | Q9ZC84 | HEMH_RICPR  | -----                                               |    |
| sp | Q68VM9 | HEMH_RICTY  | -----                                               |    |
| sp | Q92FV4 | HEMH_RICCN  | -----                                               |    |
| sp | Q73FY6 | HEMH_WOLPM  | -----                                               |    |
| sp | P57777 | HEMH_CAUCR  | -----                                               |    |
| sp | O67083 | HEMH_AQUAE  | -----                                               |    |
| sp | P22830 | HEMH_HUMAN  | RSLGANMAAALRAAGVLLRDPLASSSWRVCQPWRWKSAAAAAVTTETAQ   | 51 |
| sp | P22315 | HEMH_MOUSE  | LSASANMAAALRAAGALLREPLVHGSSRACQPWRCQSG-AAVAATTEKVH  | 50 |
| sp | P22600 | HEMH_BOVIN  | -----MAAALRSAGVLLRDRLLYGGSRACQPRRCQSGAATAAAATETAQ   | 44 |
| sp | O42479 | HEMH_CHICK  | -----MAAAGRAA----RPLVAGGRQLRVPLRWRGQVAAAAPS-----    | 34 |
| sp | O57478 | HEMH_XENLA  | -----MAAFRAAHRLLGHILRNESSAGLVTQRWSSSAAVASVP-----    | 38 |
| sp | Q9V9S8 | HEMH_DROME  | -----MFLHNTKFC--RLASGLAGGVRN-----                   | 21 |
| sp | O59786 | HEMH_SCHPO  | -----MSVSSYSSDASSTVMDESPPNGVTKS-----                | 26 |
| sp | P16622 | HEMH_YEAST  | -----MLSRITIRTQGSFLRRSQLTITRSFVSFTFN-----           | 29 |
| sp | Q6APB0 | HEMH_DESPS  | -----                                               |    |
| sp | Q747F5 | HEMH_GEOSL  | -----                                               |    |
| sp | Q9ZKD4 | HEMH_HELPJ  | -----MNL                                            | 3  |
| sp | P56107 | HEMH_HELPY  | -----MDL                                            | 3  |
| sp | Q7M7P9 | HEMH_WOLSU  | -----                                               |    |
| sp | Q7VHH1 | HEMH_HELHP  | -----                                               |    |
| sp | Q9PI08 | HEMH_CAMJE  | -----                                               |    |
| sp | Q8DFM2 | HEMH_VIBVU  | -----                                               |    |
| sp | Q7MMR4 | HEMH_VIBVY  | -----                                               |    |
| sp | Q9KTB6 | HEMH_VIBCH  | -----                                               |    |
| sp | Q87RH3 | HEMH_VIBPA  | -----                                               |    |
| sp | Q6LTE0 | HEMH_PHOPR  | -----                                               |    |

|    |        |             |                          |    |
|----|--------|-------------|--------------------------|----|
| sp | Q8EFF4 | HEMH1_SHEON | -----MLAC                | 4  |
| sp | Q8XD39 | HEMH_ECO57  | -----                    |    |
| sp | P23871 | HEMH_ECOLI  | -----                    |    |
| sp | Q8FK83 | HEMH_ECOL6  | -----                    |    |
| sp | Q83SE5 | HEMH_SHIFL  | -----                    |    |
| sp | Q8Z8T2 | HEMH_SALTI  | -----                    |    |
| sp | P37408 | HEMH_SALTY  | -----                    |    |
| sp | Q8ZC98 | HEMH_YERPE  | -----                    |    |
| sp | Q05338 | HEMH_YERPS  | -----                    |    |
| sp | P43413 | HEMH_YEREN  | -----                    |    |
| sp | Q6D7Z4 | HEMH_ERWCT  | -----                    |    |
| sp | Q7N0P6 | HEMH_PHOLL  | -----                    |    |
| sp | P43868 | HEMH_HAEIN  | -----                    |    |
| sp | P57874 | HEMH_PASMU  | -----                    |    |
| sp | Q65SV7 | HEMH_MANSM  | -----                    |    |
| sp | Q8CWW4 | HEMH_STRMU  | -----                    |    |
| sp | Q8D226 | HEMH_WIGBR  | -----                    |    |
| sp | Q8EBZ7 | HEMH2_SHEON | -----                    |    |
| sp | Q6F7N0 | HEMH_ACIAD  | -----                    |    |
| sp | Q7WGI0 | HEMH_BORBR  | -----MFLRLFXYLWPERYLPET  | 18 |
| sp | Q7W515 | HEMH_BORPA  | -----MFLRLFXYLWPERYLPET  | 18 |
| sp | Q7VVX8 | HEMH_BORPE  | -----MFLRLFXYLWPERYLPET  | 18 |
| sp | Q62HD1 | HEMH_BURMA  | -----MSFDSVPRHALSMRFDLEP | 19 |
| sp | Q63R43 | HEMH_BURPS  | -----MSFDSVPRHALSMRFDLEP | 19 |
| sp | Q8XW32 | HEMH_RALSO  | -----MPFLPEP             | 7  |
| sp | Q7NV65 | HEMH_CHRVO  | -----MAMPRYLTEP          | 10 |
| sp | Q82UK8 | HEMH_NITEU  | -----MTRMLPEP            | 8  |
| sp | Q9JVA5 | HEMH_NEIMA  | -----MLPFLPEP            | 8  |
| sp | Q9K097 | HEMH_NEIMB  | -----MLPFFPEP            | 8  |
| sp | Q8PEX0 | HEMH_XANAC  | -----                    |    |
| sp | Q8P3H6 | HEMH_XANCP  | -----                    |    |
| sp | Q9PFU1 | HEMH_XYLFA  | -----                    |    |
| sp | Q87B82 | HEMH_XYLFT  | -----                    |    |
| sp | Q607T4 | HEMH_METCA  | -----                    |    |
| sp | Q8U9F7 | HEMH_AGRT5  | -----MATELSALP           | 9  |
| sp | Q92M52 | HEMH_RHIME  | -----MDAN-               | 4  |
| sp | Q93TG2 | HEMH_BRUME  | -----MSGTDKVRVNVSQTAQT   | 17 |
| sp | Q98H61 | HEMH_RHILO  | -----MTSAIAVDPKAAKPVGVT  | 18 |
| sp | P28602 | HEMH_BRAJA  | -----MSTAAPNETT          | 10 |
| sp | Q6NBF3 | HEMH_RHOPA  | -----MSVIVPIHGP          | 10 |
| sp | Q59735 | HEMH_RHOCA  | -----MTIANRILPHAP        | 12 |
| sp | P57779 | HEMH_ZYMMO  | -----MTD                 | 3  |
| sp | Q833G5 | HEMH_ENTFA  | -----                    |    |
| sp | Q9CFB4 | HEMH_LACLA  | -----                    |    |
| sp | Q67T48 | HEMH_SYMTH  | -----                    |    |
| sp | Q88XC3 | HEMH_LACPL  | -----                    |    |
| sp | P57778 | HEMH_PSEFL  | -----                    |    |
| sp | Q888A2 | HEMH_PSESM  | -----                    |    |
| sp | Q88PV4 | HEMH_PSEPK  | -----                    |    |
| sp | Q9HVD7 | HEMH_PSEAE  | -----                    |    |
| sp | Q6MHT3 | HEMH_BDEBA  | -----                    |    |
| sp | Q83FA4 | HEMH_COXBU  | -----                    |    |
| sp | Q6MAW8 | HEMH_PARUW  | -----                    |    |
| sp | Q7MXP4 | HEMH_PORGI  | -----                    |    |
| sp | Q824K8 | HEMH_CHLCV  | -----                    |    |
| sp | Q9Z7V1 | HEMH_CHLPN  | -----                    |    |
| sp | Q9PJQ6 | HEMH_CHLMU  | -----                    |    |
| sp | O84492 | HEMH_CHLTR  | -----                    |    |
| sp | Q8GCV0 | HEMH_LEPBI  | -----                    |    |
| sp | Q81U22 | HEMH1_BACAN | -----                    |    |
| sp | Q6HM97 | HEMH1_BACHK | -----                    |    |
| sp | Q63ES4 | HEMH1_BACCZ | -----                    |    |
| sp | Q73C98 | HEMH1_BACC1 | -----                    |    |

|    |        |             |                    |    |
|----|--------|-------------|--------------------|----|
| sp | Q81GW5 | HEMH1_BACCR | -----              |    |
| sp | P32396 | HEMH_BACSU  | -----              |    |
| sp | Q8ERX9 | HEMH_OCEIH  | -----              |    |
| sp | Q71XF4 | HEMH_LISMF  | -----              |    |
| sp | Q8Y565 | HEMH_LISMO  | -----              |    |
| sp | Q929G2 | HEMH_LISIN  | -----              |    |
| sp | P64124 | HEMH_STAAM  | -----              |    |
| sp | P64125 | HEMH_STAAN  | -----              |    |
| sp | Q6G8A3 | HEMH_STAAS  | -----              |    |
| sp | P64126 | HEMH_STAAW  | -----              |    |
| sp | Q6GFM4 | HEMH_STAAR  | -----              |    |
| sp | Q8CNS1 | HEMH_STAEP  | -----              |    |
| sp | Q81TU9 | HEMH2_BACAN | -----              |    |
| sp | Q6HM28 | HEMH2_BACHK | -----              |    |
| sp | Q63EK7 | HEMH2_BACCZ | -----              |    |
| sp | Q73C08 | HEMH2_BACC1 | -----              |    |
| sp | Q81GN7 | HEMH2_BACCR | -----              |    |
| sp | Q9KDK9 | HEMH_BACHD  | -----              |    |
| sp | Q5WHT1 | HEMH_BACSK  | -----              |    |
| sp | Q72L32 | HEMH_THET2  | -----              |    |
| sp | Q9RV98 | HEMH_DEIRA  | -----              |    |
| sp | Q97R30 | HEMH_STRPN  | -----              |    |
| sp | Q8DQ04 | HEMH_STRR6  | -----              |    |
| sp | Q8FTB1 | HEMH_COREF  | -----              |    |
| sp | Q8NQA1 | HEMH_CORGL  | -----              |    |
| sp | Q6NH66 | HEMH_CORDI  | -----              |    |
| sp | Q740Y1 | HEMH_MYCPA  | -----              |    |
| sp | P71765 | HEMH_MYCTU  | -----              |    |
| sp | Q9CBM2 | HEMH_MYCLE  | -----              |    |
| sp | Q5YU18 | HEMH_NOCFA  | -----              |    |
| sp | O07401 | HEMH_MYCAV  | -----              |    |
| sp | Q83H94 | HEMH_TROW8  | -----MIRRSAVSRVVAE | 13 |
| sp | Q83FJ2 | HEMH_TROWT  | -----MIRRSAVSRVVAE | 13 |
| sp | Q6AHF2 | HEMH_LEIXX  | -----MLGATPAAAGVAE | 13 |
| sp | Q82KJ6 | HEMH_STRAW  | -----MPEALDAS      | 8  |
| sp | O50533 | HEMH_STRCO  | -----MPDVLDAS      | 8  |
| sp | Q7UFZ7 | HEMH_RHOBA  | -----MSELP         | 5  |
| sp | P72183 | HEMH_PROFR  | -----              |    |
| sp | Q9HLB8 | HEMH_THEAC  | -----              |    |
| sp | Q978U9 | HEMH_THEVO  | -----              |    |

|    |        |             |                                                     |     |
|----|--------|-------------|-----------------------------------------------------|-----|
| sp | P42043 | HEMH1_ARATH | YDETSAKARSHVVAEDKIGVLLLNLLGGPE--TLNDVQPFLYNLFADPDII | 120 |
| sp | P42044 | HEMH_CUCSA  | VGEFALESQSQAV-DDKVGVLLLNLLGGPE--TLDDVQPFLYNLFADPDII | 145 |
| sp | P42045 | HEMH_HORVU  | TFDEDVKGVSSHAVEEKVGVLLLNLLGGPE--TLNDVQPFLYNLFADPDII | 139 |
| sp | O04921 | HEMH2_ARATH | VISDAISSSSVITDDAKIGVLLLNLLGGPE--TLDDVQPFLYNLFADPDII | 131 |
| sp | O22101 | HEMH_ORYSA  | VLTSQSDFTKLLVGNKIGVLLLNLLGGPE--TLDDVQPFLYNLFADPDII  | 112 |
| sp | Q8YQR8 | HEMH_ANASP  | -----MGRVGVLLLNLLGGPD--KLEDVAPFLYNLFSDPEII          | 34  |
| sp | P54225 | HEMH_SYNY3  | -----MGRVGVLLLNLLGGPE--KLEDVRPFLYNLFADPEII          | 34  |
| sp | Q8DGU6 | HEMH_SYNEL  | -----MASQTGVLLLNLLGGPD--RPEDVRPFLYNLFSDPEII         | 35  |
| sp | Q7VD58 | HEMH_PROMA  | -----MTRVGVLLMNLGGPE--RIKDVGPFLYNLFSDPEII           | 34  |
| sp | Q7V2F5 | HEMH_PROMP  | -----MEKVGVLMLNLLGGPE--RITDVGPFYLNLFSDPEII          | 34  |
| sp | Q7V6C6 | HEMH_PROMM  | -----MARVGVLLMNLGGPE--RIQDVGPFLFNIFADPEII           | 34  |
| sp | Q7U5G0 | HEMH_SYNPX  | -----MSRVGVLLLNLLGGPE--RIQDVGPFLYNLFADPEII          | 34  |
| sp | Q7NMC7 | HEMH_GLOVI  | -----MAEVGVLLLNLLGGPD--KQEDVRPFLYNLFADPEII          | 34  |
| sp | Q9ZC84 | HEMH_RICPR  | -----MKNKRIAIIVLFNLGGPE--DIEYVKPFLFNLFYDKAII        | 35  |
| sp | Q68VM9 | HEMH_RICTY  | -----MKNKRIAIIVLFNLGGPE--DIEYVKPFLFNLFYDKAII        | 35  |
| sp | Q92FV4 | HEMH_RICCN  | -----MKNKRIAIIVLFNLGGPK--NLKSVKPFYLNLFYDKAII        | 35  |
| sp | Q73FY6 | HEMH_WOLPM  | -----MKK--AVILFNLGGPD--SLNAVRPFLFNLFYDRRII          | 33  |
| sp | P57777 | HEMH_CAUCR  | -----MTQKLAVVLFNLGGPD--GPDVAVRPFYLNLFYDRPAII        | 35  |
| sp | O67083 | HEMH_AQUAE  | -----MKK--GVILINLLGGPD--SLEAVEPFLYNLFSDPDIF         | 33  |
| sp | P22830 | HEMH_HUMAN  | HAQGAKPQVQPQRKPKTGILMLNMGGPE--TLGDVHDFLLRFLDQDLM    | 99  |
| sp | P22315 | HEMH_MOUSE  | HAKTTKPAQAPERRKPKTGILMLNMGGPE--TLGEVQDFLQRLFLDRDLM  | 98  |

|    |        |             |                                                    |    |
|----|--------|-------------|----------------------------------------------------|----|
| sp | P22600 | HEMH_BOVIN  | RARSPKQAQPGNRKPRGTGILMLNMGGPE--TVEEVQDFLQRLFLDQDLM | 92 |
| sp | Q42479 | HEMH_CHICK  | ----TKPQAEPETRKPKTGILMLNMGGPE--RLDDVHDFLLRLFLDRDLM | 78 |
| sp | O57478 | HEMH_XENLA  | KSSDPKPHAQPDKRKPKTGILMLNMGGPE--TLDDVHGFLRLFLDKDLM  | 86 |
| sp | Q9V9S8 | HEMH_ROME   | -----LSGQKPKTAI LMLNMGGPT--HTDQVHDYLLRIMTDRDMI     | 59 |
| sp | O59786 | HEMH_SCHPO  | -----VSGKGP-TAVVMMNMGGPS--NLDEVGPFLLERLFTDGDII     | 63 |
| sp | P16622 | HEMH_YEAST  | -----MQNAQKRSPTGIVLMMNMGGPS--KVEETYDFLYQLFADNDLI   | 69 |
| sp | Q6APP0 | HEMH_DESPS  | -----MQNIPTGVILLNMGGPT--QTKDVRPFLLYNLFSREII        | 36 |
| sp | Q747F5 | HEMH_GEOSL  | -----MSDK-TAVLLLQMGGPD--SLDAVEPFLNLFSDRDI          | 35 |
| sp | Q9ZKD4 | HEMH_HELPJ  | INEKLNLENSATKSPKEAVVLLNMGGPN--SLYEVGVFLKNMFDDPFIL  | 51 |
| sp | P56107 | HEMH_HELPY  | INEKLNLENNATKSPKEAVILLNMGGPN--SLYEVGVFLKNMFDDPFIL  | 51 |
| sp | Q7M7P9 | HEMH_WOLSU  | -----MKAIVILLNMGGPS--SLLEVDMFLKNMFNDPRIL           | 33 |
| sp | Q7VHH1 | HEMH_HELHP  | -----MGSPN--SLFEVESFLKNMFNDPLIL                    | 24 |
| sp | Q9PI08 | HEMH_CAMJE  | -----MKLVFLNMGGAT--NLQDCEVFLKNMFNDPYIL             | 32 |
| sp | Q8DFM2 | HEMH_VIBVU  | -----MNNTKKRGVLLVNLGTPPEATAPAVKRFLSQFLHDQRVV       | 39 |
| sp | Q7MMR4 | HEMH_VIBVY  | -----MNNTKKRGVLLVNLGTPPEATAPAVKRFLSQFLHDQRVV       | 39 |
| sp | Q9KTB6 | HEMH_VIBCH  | -----MNNHKKLGILLANLGTDPQAPTSQAVKAFLSQFLHDQRVV      | 39 |
| sp | Q87RH3 | HEMH_VIBPA  | -----MQTKNKQGVLLVNLGTPDEPTAPAVKRFLSQFLHDHRVV       | 39 |
| sp | Q6LTE0 | HEMH_PHOPR  | -----MKNNN-YGVLLVNLGTPDEASPAAIKRFLSEFLSDRRVV       | 38 |
| sp | Q8EFF4 | HEMH1_SHEON | RGIWLIKGSTLTSPSPAFVLLVNLGTPDEPTPKAVKRFLKQFLSDRRVV  | 54 |
| sp | Q8XD39 | HEMH_ECO57  | -----MRQTKTGILLANLGTDPAPTPEAVKRYLKQFLSDRRVV        | 38 |
| sp | P23871 | HEMH_ECOLI  | -----MRQTKTGILLANLGTDPAPTPEAVKRYLKQFLSDRRVV        | 38 |
| sp | Q8FK83 | HEMH_ECOL6  | -----MRQTKTGILLANLGTDPAPTPEAVKRYLKQFLSDRRVV        | 38 |
| sp | Q83SE5 | HEMH_SHIFL  | -----MRQTKTGILLANLGTDPAPTPEAVKRYLKQFLSDRRVV        | 38 |
| sp | Q8Z8T2 | HEMH_SALTI  | -----MRQTKTGILLANLGTDPAPTPEAVKRYLKQFLSDRRVV        | 38 |
| sp | P37408 | HEMH_SALTY  | -----MRQTKTGILLANLGTDPAPTPEAVKRYLKQFLSDRRVV        | 38 |
| sp | Q8ZC98 | HEMH_YERPE  | -----MMQSKPGVLMVNLGTPDAPTSKAIKRYLAEFLSDRRVV        | 38 |
| sp | Q05338 | HEMH_YERPS  | -----MMQSKPGVLMVNLGTPDAPTSKAIKRYLAEFLSDRRVV        | 38 |
| sp | P43413 | HEMH_YEREN  | -----MKQSKLGVLMVNLGTPDAPTPQAVKRYLAEFLSDRRVV        | 38 |
| sp | Q6D7Z4 | HEMH_ERWCT  | -----MKQEKYGVLMVNLGTPDAPTPQAVRRYLAEFLSDRRVV        | 38 |
| sp | Q7N0P6 | HEMH_PHOLL  | -----MNNGKFGVLLVNLGTPDKPTTAAIRRYLAEFLSDKRVV        | 38 |
| sp | P43868 | HEMH_HAEIN  | -----MTKPAKIGVLLANLGTDPDSPTPKSISRYLWQFLTDPRVV      | 39 |
| sp | P57874 | HEMH_PASMU  | -----MNK-AKTGVLLVNLGTPESPTPKAISRYLWQFLTDPRVV       | 38 |
| sp | Q65SV7 | HEMH_MANSM  | -----MKSSKTGILLANLGTDPDTPSPKAI SRYLKEFLSDPRVV      | 38 |
| sp | Q8CWW4 | HEMH_STRMU  | -----MSQQKIGVLLVNLGTPPEHTAPAIRKFLKPFPLADSRVI       | 38 |
| sp | Q8D226 | HEMH_WIGBR  | -----MKNNIGI I I SNVGT PSHPNKKS VKKYLSEFLSDKRVV    | 37 |
| sp | Q8EBZ7 | HEMH2_SHEON | -MGHAA-----RGKVGVLLNLGTPDAPTASAVRRYLAEFLSDPRVV     | 41 |
| sp | Q6F7N0 | HEMH_ACIAD  | -MPIFP-----KPKVTVILANLGTDPDVTASAVRAFLKQFLSDQRVI    | 41 |
| sp | Q7WGI0 | HEMH_BORBR  | PAQDPFDENPPPCGPRGVLLVNLGTPDEPTRGAI RRYLGEFLSDPRVI  | 68 |
| sp | Q7W515 | HEMH_BORPA  | PAQDPFDENPPPCGPRGVLLVNLGTPDEPTRGAI RRYLGEFLSDPRVI  | 68 |
| sp | Q7VVX8 | HEMH_BORPE  | PAQDPFDENPPPCGPRGVLLVNLGTPDEPTRGAI RRYLGEFLSDPRVI  | 68 |
| sp | Q62HD1 | HEMH_BURMA  | PSHASA-----AHRVAVLLVNLGTPDAPT PRAVRRYLAQFLSDPRVV   | 61 |
| sp | Q63R43 | HEMH_BURPS  | PSHASA-----AHRVAVLLVNLGTPDAPT PRAVRRYLAQFLSDPRVV   | 61 |
| sp | Q8XW32 | HEMH_RALSO  | LFQHGQ-----PDRTA ILLVNLGTPDGTSPREVGRYLRQFLSDPRVV   | 49 |
| sp | Q7NV65 | HEMH_CHRVO  | AFRHDY-----APKTGVLLINLGTDPAPTAQALRPYLKQFLSDPRVI    | 52 |
| sp | Q82UK8 | HEMH_NITEU  | AYRHGS-----VGKIGVLLINLGTDPAPTAKALRAYLKQFLSEPRIV    | 50 |
| sp | Q9JVA5 | HEMH_NEIMA  | SLSYDQ-----QNRTAVLLNLGTPDAPTAQAVRPYLKSFLLTDRRVV    | 50 |
| sp | Q9K097 | HEMH_NEIMB  | SLSYDQ-----QNRTAVLLNLGTPDAPTAQAVRPYLKSFLLTDRRVV    | 50 |
| sp | Q8PEX0 | HEMH_XANAC  | -MN-----TTPDTALLVNLGTPESPTAPAVRRYLAEFLSDRRVV       | 39 |
| sp | Q8P3H6 | HEMH_XANCP  | -MN-----TSDTALLVNLGTPESPTVPAVRRYLAEFLSDRRVV        | 39 |
| sp | Q9PFU1 | HEMH_XYLFA  | -MN-----HTSDTALLIVNLGTPPEAPTAAAVRRYLGEFLSDRRVV     | 39 |
| sp | Q87B82 | HEMH_XYLFT  | -MN-----HTSDTALLIVNLGTPPEAPTAAAVRRYLGEFLSDRRVV     | 39 |
| sp | Q607T4 | HEMH_METCA  | -MHP-----TAARTGVLLINLGTPEAPT PKAVRRYLREFLSDPRVV    | 40 |
| sp | Q8U9F7 | HEMH_AGRT5  | ANHPRV-----TFGKVGVLLVNLGTPDGTDYWPMRRYLAEFLSDKRVV   | 52 |
| sp | Q92M52 | HEMH_RHIME  | TEHPAV-----GYKLGVLLVNLGTPDGT DVTSMRRYLREFLSDRVV    | 47 |
| sp | Q93TG2 | HEMH_BRUME  | PLHTSA-----KLPKVGVLLVNLGTPDGT SYGPMRRYLAEFLSDRVV   | 60 |
| sp | Q98H61 | HEMH_RHILO  | AGHAPA-----GAGKVGVLLVNLGTPDGT EFKPMRRYLREFLSDRVV   | 61 |
| sp | P28602 | HEMH_BRAJA  | QPTVQS-----GQKRVGVLLVNLGTPDTADAPGVRVYLKEFLSDARVI   | 53 |
| sp | Q6NBF3 | HEMH_RHOPA  | AIAPAP-----APERVGVLLVNLGTPDSCDTKGVRIYLREFLSDRVV    | 53 |
| sp | Q59735 | HEMH_RHOCA  | ADHPPV-----PVPRVGVLLANLGTDPATDYWSMRRYLNEFLSDRVV    | 55 |
| sp | P57779 | HEMH_ZYMMO  | SNNPLP-----ISEKIGVLLVNLGTPDAPNAKALRRYLQFLSVQRVI    | 46 |
| sp | Q833G5 | HEMH_ENTFA  | -----MKRTGILLVNLGTPKDSKTEVRKYLKTFLLSDRVV           | 36 |
| sp | Q9CFB4 | HEMH_LACLA  | -----MDKKKGI LLVALGT PRSCEADDVRDYLKEFLGDPLVI       | 37 |
| sp | Q67T48 | HEMH_SYMTH  | -----MEKTAVLLVNLGTPSAPEPDAVRPYLAEFLGDWVVI          | 36 |

|    |        |             |                                                  |    |
|----|--------|-------------|--------------------------------------------------|----|
| sp | Q88XC3 | HEMH_LACPL  | -----MHPGLLLVNLGSPASPRTKDVKAYLQEFLLSDPSVI        | 35 |
| sp | P57778 | HEMH_PSEFL  | -----MTDH-----ALLLVNLGSPASTSVADVRSYLNQFLMDPYVI   | 36 |
| sp | Q888A2 | HEMH_PSESM  | -----MTDH-----ALLLVNLGSPASTQVADVRSYLNQFLMDPYVI   | 36 |
| sp | Q88PV4 | HEMH_PSEPK  | -----MTDH-----ALLLVNLGSPASTSVADVRRYLNQFLMDPYVI   | 36 |
| sp | Q9HVD7 | HEMH_PSEAE  | -----MTEN-----ALLLVNLGSPDSTRVEDVRRYLDQFLMDPYVV   | 36 |
| sp | Q6MHT3 | HEMH_BDEBA  | -----MGKK-----GLLLINIGSPKSYQVNDVKKYLSEFLMDEDVI   | 36 |
| sp | Q83FA4 | HEMH_COXBU  | -----MAVKNNNKIGVLLINLGTPEPSVPAVRRYLRQFLSDPKVI    | 41 |
| sp | Q6MAW8 | HEMH_PARUW  | -----MNQR-----TGILLVNLGTPKTPRPKDVYRYLNEFLTDGRVI  | 37 |
| sp | Q7MXP4 | HEMH_PORGI  | ---MADRRRTDDNKGAREVVLNIGSPDSPEEKDVARYLNSFLTDRRII | 47 |
| sp | Q824K8 | HEMH_CHLCV  | -----MVS--AYLLANFGGPR--HSNDIEVFLTSLTDRDVT        | 33 |
| sp | Q9Z7V1 | HEMH_CHLPN  | -----MTPPAYLLANFGGPR--HAKDLQEFLLISLLTDRDVT       | 34 |
| sp | Q9PJQ6 | HEMH_CHLMU  | -----MTV--YLLANFGGPR--ISQEI PPSFLHALLTDQDVT      | 32 |
| sp | O84492 | HEMH_CHLTR  | -----MVT--YLLANFGGPR--TSQEI VSFLLQALLTDRDVT      | 32 |
| sp | Q8GCV0 | HEMH_LEPBI  | -----MITNKVKTLLVNLGGPR--TPSEIEVFLRDLFSDPFVF      | 37 |
| sp | Q81U22 | HEMH1_BACAN | -----MKKKIGLLVMAYGTPY--KEEDIERYTH-----           | 27 |
| sp | Q6HM97 | HEMH1_BACHK | -----MKKKIGLLVMAYGTPY--KEEDIERYTH-----           | 27 |
| sp | Q63ES4 | HEMH1_BACCZ | -----MKKKIGLLVMAYGTPY--KEEDIERYTH-----           | 27 |
| sp | Q73C98 | HEMH1_BACC1 | -----MKKKIGLLVMAYGTPY--KEEDIERYTH-----           | 27 |
| sp | Q81GW5 | HEMH1_BACCR | -----MKKKIGLLVMAYGTPY--KEEDIERYTH-----           | 27 |
| sp | P32396 | HEMH_BACSU  | -----MSRKKMGLLVMA YGTPY--KEEDIERYTH-----         | 28 |
| sp | Q8ERX9 | HEMH_OCEIH  | -----MEKKKIGLLVMAYGTPY--KEEDIERYTH-----          | 28 |
| sp | Q71XF4 | HEMH_LISMF  | -----MTKKVGLLVMA YGTPY--KDEDIERYTH-----          | 27 |
| sp | Q8Y565 | HEMH_LISMO  | -----MTKKVGLLVMA YGTPY--KDEDIERYTH-----          | 27 |
| sp | Q929G2 | HEMH_LISIN  | -----MTKKVGLLVMA YGTPY--KDEDIERYTH-----          | 27 |
| sp | P64124 | HEMH_STAAM  | -----MTKKMGLLVMA YGTPY--KESDIEPYTH-----          | 27 |
| sp | P64125 | HEMH_STAAN  | -----MTKKMGLLVMA YGTPY--KESDIEPYTH-----          | 27 |
| sp | Q6G8A3 | HEMH_STAAS  | -----MTKKMGLLVMA YGTPY--KESDIEPYTH-----          | 27 |
| sp | P64126 | HEMH_STA AW | -----MTKKMGLLVMA YGTPY--KESDIEPYTH-----          | 27 |
| sp | Q6GFM4 | HEMH_STAAR  | -----MTKKMGLLVMA YGTPY--KESDIEPYTH-----          | 27 |
| sp | Q8CNS1 | HEMH_STAEP  | -----MTKTIGLLVMA YGTPY--KESDIEPYTH-----          | 27 |
| sp | Q81TU9 | HEMH2_BACAN | -----MKKKIGLLVMA YGTPD--SLDEVEAYTH-----          | 28 |
| sp | Q6HM28 | HEMH2_BACHK | -----MKKKIGLLVMA YGTPD--SLDEVEAYTH-----          | 28 |
| sp | Q63EK7 | HEMH2_BACCZ | -----MKKKIGLLVMA YGTPD--SLEDVEAYTH-----          | 28 |
| sp | Q73C08 | HEMH2_BACC1 | -----MAKKKIGLLVMA YGTPD--SLEDVEAYTH-----         | 28 |
| sp | Q81GN7 | HEMH2_BACCR | -----MKKKIGLLVMA YGTPD--SLDDVEAYTH-----          | 28 |
| sp | Q9KDK9 | HEMH_BACHD  | -----MTKKKIGLLVMA YGTPR--TKEEIEPYTH-----         | 28 |
| sp | Q5WHT1 | HEMH_BACSK  | -----MEKKKIGLLVMA YGTPR--KKEEIEPYTH-----         | 28 |
| sp | Q72L32 | HEMH_THET2  | -----MNVLLMAYGTPY--APEEVEPYTH-----               | 23 |
| sp | Q9RV98 | HEMH_DEIRA  | -----MTTLTNQKPLGVLFMAYGGPE--NLGEMPGYLAD--        | 32 |
| sp | Q97R30 | HEMH_STRPN  | -----MKKAILMMTFGSPEE IIFEGVADFFTN-----           | 27 |
| sp | Q8DQ04 | HEMH_STRR6  | -----MKKAILMMTFGSPEE IIFEGVADFFTN-----           | 27 |
| sp | Q8FTB1 | HEMH_COREF  | ---MNARTPDTKSDSYDALLVLSFGGPE--GPEEVRPFLEN-----   | 36 |
| sp | Q8NQA1 | HEMH_CORGL  | ---MNERT---SDAFDALLVLSFGGPE--GHEEVRPFLEN-----    | 32 |
| sp | Q6NH66 | HEMH_CORDI  | ---MLPLPTWTLSD--VDAILVLSFGGPE--GQDVIPFLEN-----   | 35 |
| sp | Q740Y1 | HEMH_MYCPA  | -----MDFDAVLLLSFGGPE--GPEQVRPFLEN-----           | 26 |
| sp | P71765 | HEMH_MYCTU  | -----MQFDAVLLLSFGGPE--GPEQVRPFLEN-----           | 26 |
| sp | Q9CBM2 | HEMH_MYCLE  | -----MLFDAALLLSFGGPD--GPEQVRPFLEN-----           | 26 |
| sp | Q5YU18 | HEMH_NOCFA  | -----MAVEALLLSFGGPE--RPEDVMPFLEN-----            | 26 |
| sp | O07401 | HEMH_MYCAV  | -----MDFDAVLLLSFGGPE--GPSRFGRSWRTSPG-----        | 29 |
| sp | Q83H94 | HEMH_TROW8  | GSAIASDSGFALGASQYDAVLLSFGGPE--GPEDVVPFLKK-----   | 53 |
| sp | Q83FJ2 | HEMH_TROWT  | GSAIASDSGFALGASQYDAVLLSFGGPE--GPEDVVPFLKK-----   | 53 |
| sp | Q6AHF2 | HEMH_LEIXX  | HVTEP-----VAYDAILLAGFGGPE--GQDDVIPFLRN-----      | 44 |
| sp | Q82KJ6 | HEMH_STRAW  | -----PYDALLLSFGGPE--GPDDVVPFLEN-----             | 33 |
| sp | O50533 | HEMH_STRCO  | -----PYDALLLSFGGPE--GPDDVVPFLEN-----             | 33 |
| sp | Q7UFZ7 | HEMH_RHOBA  | -----PYDSFLLVSFGGPE--GQDDVMPFLEN-----            | 30 |
| sp | P72183 | HEMH_PROFR  | -----MTSFDALLVAGFGGPE--SMAEVPDFLQR-----          | 27 |
| sp | Q9HLB8 | HEMH_THEAC  | -----MKSALLLSYGSPE--RIEDLDEYLKN-----             | 25 |
| sp | Q978U9 | HEMH_THEVO  | -----MKTAVLLLSYGSPE--KMSDIDEYLSK-----            | 25 |

\*

|    |        |             |                                                   |     |
|----|--------|-------------|---------------------------------------------------|-----|
| sp | P42043 | HEMH1_ARATH | RLPRPFQFLQGTIAKFISVVRAPKSKEGYAAIGGGS-----PLRKITDE | 164 |
| sp | P42044 | HEMH_CUUSA  | RLPRLFRFLQEPKALLISTYRAPKSKEGYASIGGGS-----PLRKITDE | 189 |
| sp | P42045 | HEMH_HORVU  | RLPRLFRFLQRPLAKLISTFRAPKSNEGYASIGGGS-----PLRKITDE | 183 |

|    |        |             |                                                     |     |
|----|--------|-------------|-----------------------------------------------------|-----|
| sp | O04921 | HEMH2_ARATH | RLPPVFQFLQKPLAQFISVARAPKSKEGYASIGGGG-----PLRHITDA   | 175 |
| sp | O22101 | HEMH_ORYSA  | RLPRLFRFLQKPLAQFISVVRAPKSKEGYASIGGGG-----PLRQITDA   | 156 |
| sp | Q8YQR8 | HEMH_ANASP  | RLP--FRWLQKPLAWFIASRRTKTSQENYKQIGGGG-----PLRRITEA   | 76  |
| sp | P54225 | HEMH_SYNY3  | RLP--FPWLQKPLAWLISTLRAKKSQANYAEIGGGG-----PLLQITEA   | 76  |
| sp | Q8DGU6 | HEMH_SYNEL  | RLP--FRWLQKPLAWFIISTSRARRSQANYAQIGGGG-----PLRRITEQ  | 77  |
| sp | Q7VD58 | HEMH_PROMA  | RLP--LPFQKPLAWFISTLRSSKSQKAYQAIGGGG-----PLRRITEQ    | 76  |
| sp | Q7V2F5 | HEMH_PROMP  | RLP--VPAFQKPLAWLISTLRSTTSQQAYLSIGGGG-----PIRRITEQ   | 76  |
| sp | Q7V6C6 | HEMH_PROMM  | RLP--NPALQRPLAWLISTLRSSKSEQAYRSIGGGG-----PLRRITEQ   | 76  |
| sp | Q7U5G0 | HEMH_SYNPX  | RLP--SPALQKPLAWLISTLRSGKSQEAYRSIGGGG-----PLRRITEQ   | 76  |
| sp | Q7NMC7 | HEMH_GLOVI  | RIP--VPPLQKPLAWLISTLRAPKSRKNYQAIGGGG-----PLRAITNQ   | 76  |
| sp | Q9ZC84 | HEMH_RICPR  | NLPN---PLRYIIAKIISITREKKSQKIYSLIGGKS-----YLIQETEK   | 76  |
| sp | Q68VM9 | HEMH_RICTY  | NLPN---PLRYVIAKIIISIVREKKSQKIYSLIGRKS-----YLIQETEK  | 76  |
| sp | Q92FV4 | HEMH_RICCN  | NLPN---PLRYIIAKIISITREKKSQKIYSLIGGKS-----SLLQETEE   | 76  |
| sp | Q73FY6 | HEMH_WOLPM  | NLPN---PFRFLLAKFISAKRENTARKIYEEIGGKS-----PILENTKM   | 74  |
| sp | P57777 | HEMH_CAUCR  | GAPA---LIRYPLAALISTTREKSAKANYAIMGGGG-----PLLPETEK   | 76  |
| sp | O67083 | HEMH_AQUAE  | SLP-----FQKVLAKIIAKLRKAKTRHYELMGGKS-----PQYEQTLE    | 72  |
| sp | P22830 | HEMH_HUMAN  | TLP-----IQNKLAPFIAKRRTPKIQEQYRRIGGGG-----PIKIWTSK   | 138 |
| sp | P22315 | HEMH_MOUSE  | TLP-----IQNKLAPFIAKRRTPKIQEQYRRIGGGG-----PIKMWTSK   | 135 |
| sp | P22600 | HEMH_BOVIN  | TLP-----VQDKLGFPIAKRRTPKIQEQYRRIGGGG-----PIKMWTSK   | 131 |
| sp | O42479 | HEMH_CHICK  | TLP-----AQNKLAPFIAKRRTPRIQEQYSRIGGGG-----PIKKWTAV   | 117 |
| sp | O57478 | HEMH_XENLA  | TLP-----AQSKLAPFIAKRRTPKIQEQYSKIGGGG-----PIKKWTEQ   | 125 |
| sp | Q9V9S8 | HEMH_DROME  | QLP-----VQSRLGPWIAQRRTPEVQKQYKEIGGGG-----PILKWTEL   | 98  |
| sp | O59786 | HEMH_SCHPO  | PLGY----FQNSLGKFIKRRTPKVQNHYSIDIGGGG-----PILHWTRI   | 103 |
| sp | P16622 | HEMH_YEAST  | PISA---KYQKTIAKYIAKFRTPKIEKQYREIGGGG-----PIRKWSEY   | 110 |
| sp | Q6APB0 | HEMH_DESPS  | PLGP--RLMQLPLAWLIAKRRAPKSAATYERIGGGG-----PLKQITEA   | 78  |
| sp | Q747F5 | HEMH_GEOSL  | RIGP--AFLQPFIIARLIAKRSPGVERKYEEIGGKS-----PIRELTES   | 77  |
| sp | Q9ZKD4 | HEMH_HELPJ  | TIKN--NFMRMVGMKMIVNSRIEKSKKIYEKLGGS-----PLTPITFA    | 93  |
| sp | P56107 | HEMH_HELPY  | TIKN--NFMRMVGMKMIVNSRIEKSKKIYEKLGGS-----PLTPITFA    | 93  |
| sp | Q7M7P9 | HEMH_WOLSU  | PIKS--PFRSLVASFIANRRSETAKANYRKIGGGG-----PLIGHTFN    | 75  |
| sp | Q7VHH1 | HEMH_HELHP  | GIKN--TFARKMLASFIHRSVEETKKNYQAIGGGG-----PLTAHTLN    | 66  |
| sp | Q9PI08 | HEMH_CAMJE  | GIKN--RFLRKFVAWIIITKARVKAMQENYKMGGS-----PLNELTQS    | 74  |
| sp | Q8DFM2 | HEMH_VIBVU  | D--MTRWLWCPILHGIILPIRSPKVAKLYQTVWMKE----GSPLMVYSKR  | 83  |
| sp | Q7MMR4 | HEMH_VIBVY  | D--MTRWLWCPILHGIILPIRSPKVAKLYQTVWMKE----GSPLMVYSKR  | 83  |
| sp | Q9KT6  | HEMH_VIBCH  | D--MSRWLWCPILLHGIILPTRSPKVAKLYQSIWMDE----GSPLMVYSRR | 83  |
| sp | Q87RH3 | HEMH_VIBPA  | D--MTRWLWCPILHGVILPIRSPKVAKLYESVWMEE----GSPLMVYSKR  | 83  |
| sp | Q6LTE0 | HEMH_PHOPR  | D--MTRWLWCPILHGVILPIRSPKVAKLYQSVWMED----GSPLMVYSQR  | 82  |
| sp | Q8EFF4 | HEMH1_SHEON | D--LSPWLWQPILOGIILNTRPKKVAKLYQSVWTEQ----GSPLMVISQC  | 98  |
| sp | Q8XD39 | HEMH_ECO57  | D--TSRLLWWPLLRGVILPLRSRPAKLYASVWMMEG----GSPLMVYSRQ  | 82  |
| sp | P23871 | HEMH_ECOLI  | D--TSRLLWWPLLRGVILPLRSRPAKLYASVWMMEG----GSPLMVYSRQ  | 82  |
| sp | Q8FK83 | HEMH_ECOL6  | D--TSRLLWWPLLRGVILPLRSRPAKLYASVWMMEG----GSPLMVYSRQ  | 82  |
| sp | Q83SE5 | HEMH_SHIFL  | D--TSRLLWWPLLRGVILPLRSRPAKLYASVWMED----GSPLMVYSRQ   | 82  |
| sp | Q8Z8T2 | HEMH_SALTI  | D--TPRLLWWPLLRGVILPLRSRPAKLYQSIWMDG----GSPLMVYSRE   | 82  |
| sp | P37408 | HEMH_SALTY  | D--TPRLLWWPLLRGVILPLRSRPAKLYQSIWMDG----GSPLMVYSRE   | 82  |
| sp | Q8ZC98 | HEMH_YERPE  | D--TSPLLWWPLLHGVILPLRSRPAKLYQSVWMEE----GSPLLVSRR    | 82  |
| sp | Q05338 | HEMH_YERPS  | D--TSPLLWWPLLHGVILPLRSRPAKLYQSVWMEE----GSPLLVSRR    | 82  |
| sp | P43413 | HEMH_YEREN  | D--TSPWLWWPLLRGVILPIRSPRPAKLYQSVWMDE----GSPLLVSRR   | 82  |
| sp | Q6D7Z4 | HEMH_ERWCT  | D--TPRLLWWPLLRGVILPIRSPRPAKLYQSVWMEG----GSPLLVSRR   | 82  |
| sp | Q7N0P6 | HEMH_PHOLL  | D--LSRFLWKPILYGFVLPFRSSRPAKLYQKIWTDE----GSPLLVSRR   | 82  |
| sp | P43868 | HEMH_HAEIN  | D--LPRCKWYPLLKAIILPLRSKRIAKNYQAIWTEQ----GSPLLAISRQ  | 83  |
| sp | P57874 | HEMH_PASMU  | D--LPRYKWFPLLKGIILPLRAKRVAKNYASIWTEQ----GSPLLTITRE  | 82  |
| sp | Q65SV7 | HEMH_MANSM  | D--LPRWKWLPLNGIILPIRSRRIAKNYGAIWTEQ----GSPLFAITQK   | 82  |
| sp | Q8CWW4 | HEMH_STRMU  | D--YPKFLWKPILYGFVLPFRPRKVKPLYQHVWTNE----GSPLYANAIG  | 82  |
| sp | Q8D226 | HEMH_WIGBR  | D--ISRFFWIPYLHLHYFLPLKSYKSVNLYKKIWEKD----GSPLMINSLN | 81  |
| sp | Q8EBZ7 | HEMH2_SHEON | E--IPKLLWMLILYGVILRVPAKSAALYQKVWTEAG----SPLMDISLR   | 85  |
| sp | Q6F7N0 | HEMH_ACIAAD | E--IPKLLWMLILYGFVLPFRPKRVAHAYASVWGQD----SPMREILFA   | 84  |
| sp | Q7WGI0 | HEMH_BORBR  | E--IPRYLWMPILHGLVLAAMRPKLLAPRYAGIWMEE----GSPLLVSQR  | 112 |
| sp | Q7W515 | HEMH_BORPA  | E--IPRYLWMPILHGLVLAAMRPKLLAPRYAGIWMEE----GSPLLVSQR  | 112 |
| sp | Q7VXX8 | HEMH_BORPE  | E--IPRYLWMPILHGLVLAAMRPKLLAPRYAGIWMEE----GSPLLVSQR  | 112 |
| sp | Q62HD1 | HEMH_BURMA  | E--IPQLVWQVILCTLILPLRGRASAKKYAAVWLPE----GSPLRVYTER  | 105 |
| sp | Q63R43 | HEMH_BURPS  | E--IPQLVWQVILRTLILPLRGRASAKKYAAVWLPE----GSPLRVYTER  | 105 |
| sp | Q8XW32 | HEMH_RALSO  | E--IPRAAWWFILNVLILPLRSRASAKKYETVWLREANMTGSPLLVSER   | 97  |
| sp | Q7NV65 | HEMH_CHRVO  | E--IPRLPWWLILNGIILNTRPKQSAKKYASIWTEQ----GSPLLLHTRS  | 96  |
| sp | Q82UK8 | HEMH_NITEU  | E--FPRWLWWFILNGIILNVRPAKSAKKYEQIWTSE----GSPLRVHTAR  | 94  |



|    |        |             |                                                      |     |
|----|--------|-------------|------------------------------------------------------|-----|
| sp | Q9JVA5 | HEMH_NEIMA  | E--LPKWLWYPILHGLVLTLPKKS AHAYEKIWFKE ----GSPLEVYTAR  | 94  |
| sp | Q9K097 | HEMH_NEIMB  | E--LPKWLWYPILHGLVLTLPKKS AHAYEKIWFKE ----GSPLEVYTAR  | 94  |
| sp | Q8PEX0 | HEMH_XANAC  | A--IPPLFWKPLLYGVILPIRGPKSAEKYAKVWLPE ----GSPLAVYTRR  | 83  |
| sp | Q8P3H6 | HEMH_XANCP  | A--IPPLFWKPLLYGVILPIRGPKSAEKYAKVWLPE ----GSPLAVYTRR  | 83  |
| sp | Q9PFU1 | HEMH_XYLFA  | S--IPPLFWKPLLHMVILPIRGPRSASKYAKVWLQE ----GSPLSVYTRR  | 83  |
| sp | Q87B82 | HEMH_XYLFT  | S--IPPLFWKPLLHMVILPIRGPRSASKYAKVWLQE ----GSPLSVYTRR  | 83  |
| sp | Q607T4 | HEMH_METCA  | E--IPRVLWVWPILNLVVLTRSRKSAHAYRTIWTER ----GSPLLAYTQD  | 84  |
| sp | Q8U9F7 | HEMH_AGRT5  | E--WSRLYWYPILYGIVLNKRPQKVGKAYEEIWNHERN --ESYLRTYTRS  | 98  |
| sp | Q92M52 | HEMH_RHIME  | E--WSRLFWYPILYGIVLNTRPRKVGKAYELIWNKDLN --ESWLRTYTRN  | 93  |
| sp | Q93TG2 | HEMH_BRUME  | E--WSRLIWYPILYGIVLNTRPRRSGRLYDRIWNHENN --ESPLRTYTRA  | 106 |
| sp | Q98H61 | HEMH_RHILO  | E--LNKAIWYPILYGLVILTRPKKSGANYARIWNQERN --ESPLRTYTRA  | 107 |
| sp | P28602 | HEMH_BRAJA  | E--DQGLVWVVLNGIILRSRPTKALDYQKIWNNEKN --ESPLKTI TRS   | 99  |
| sp | Q6NBF3 | HEMH_RHOPA  | E--NQGLFWKLALNGIILNTRPARKAKDYQKIWNHEKN --ESPLKTI TRS | 99  |
| sp | Q59735 | HEMH_RHOCA  | D--YPIWKWQPLLQLIILSKRPFTSGNNYRSIWNEERD --ESPLMTITRD  | 101 |
| sp | P57779 | HEMH_ZYMMO  | E--LPAVFWQIILRGIILPFRAPRSARAYQKIWTNE ----GSPLAATTK   | 90  |
| sp | Q833G5 | HEMH_ENTFA  | K--IHPIIWKPIILNGIILNIRPKKSAKLYQKICTEN ----GFPLLEYTEK | 80  |
| sp | Q9CFB4 | HEMH_LACLA  | Q--KPRWLWLPILNGIILKVRPQKSAEMYKKIWTDE ----GSPLMIYTV   | 81  |
| sp | Q67T48 | HEMH_SYMTH  | D--KPRWQWPLILHGIILRPPRVAKIYQKIWLPE ----GSPLHYTRR     | 80  |
| sp | Q88XC3 | HEMH_LACPL  | E--MPAALWQPLL RGIILPTRSWRSATFYQDSWLPQ ----GSPLIVYSA  | 79  |
| sp | P57778 | HEMH_PSEFL  | D--LPWPVRRLLVSLILIKRPA-QSAHAYASIWWE ----GSPLVLSRR    | 79  |
| sp | Q888A2 | HEMH_PSESM  | D--IPWPLRLLVSLILIKRPE-QSAHAYASIWWE ----GSPLVLSKR     | 79  |
| sp | Q88PV4 | HEMH_PSEPK  | D--LPWPVRRLLVSLVILIKRPE-QSAHAYASIWWE ----GSPLVLTTR   | 79  |
| sp | Q9HVD7 | HEMH_PSEAE  | D--LPWPLRLLVSLILIKRPA-ESAHAYSSIWWE ----GSPLIVLSRR    | 79  |
| sp | Q6MHT3 | HEMH_BDEBA  | T--LPYVLRWPLVNLIVPRRAFSAENYKVVWME ----GSPiAVYTRR     | 80  |
| sp | Q83FA4 | HEMH_COXBU  | D--VPSLVRWIIVHLCILPFRPKRSKLYQKIWMPE ----GSPLLVYSEM   | 85  |
| sp | Q6MAW8 | HEMH_PARUW  | D--LPWLKRQLLVRCIIVPFYKQSSMLYQKLWTAE ----GSPLLVHGIA   | 81  |
| sp | Q7MXP4 | HEMH_PORGI  | T--LPFLLRQLLV RGIITPFRRKSSAQKYRTVWDES ----TRSFPLISHT | 91  |
| sp | Q824K8 | HEMH_CHLCV  | GGFLPSFIHKRLFS-FIAKKRALKVLQPQYNCI --GG----FSPiYQDTEL | 76  |
| sp | Q927V1 | HEMH_CHLPN  | GTFLPRVLRHRLFT-FIAKKRVPKVLPQYQSL --QN----WSPiYFDTET  | 77  |
| sp | Q9PJQ6 | HEMH_CHLMU  | GGRIPPWLHRPLFS-YIAKRRHRVAEQYAYL --GG----RSPiFQDTEK   | 75  |
| sp | Q84492 | HEMH_CHLTR  | GGMIPSM LHRPLFS-YIAKRRAPHVARQYAYL --GG----GSPiFDTER  | 75  |
| sp | Q8GCV0 | HEMH_LEPBI  | DLPLPEFLRLRLAR-FIAKKRAPKVQKSYESMGFGG ----GSPiVEETAK  | 82  |
| sp | Q81U22 | HEMH1_BACAN | -----IRRGRKPSEEMLEDLTERYRAIGGIS -----PLATITTE        | 61  |
| sp | Q6HM97 | HEMH1_BACHK | -----IRRGRKPSEEMLEDLTERYRAIGGIS -----PLATITTE        | 61  |
| sp | Q63ES4 | HEMH1_BACCZ | -----IRRGRKPSEEMLEDLTERYRAIGGIS -----PLATITTE        | 61  |
| sp | Q73C98 | HEMH1_BACC1 | -----IRRGRKPSEEMLEDLTERYRAIGGIS -----PLATITTE        | 61  |
| sp | Q81GW5 | HEMH1_BACCR | -----IRRGRKPSEEMLEDLTERYRAIGGIS -----PLATITTE        | 61  |
| sp | P32396 | HEMH_BACSU  | -----IRHGRKPEPEMLQDLKDRYEAIGGIS -----PLAQITEQ        | 62  |
| sp | Q8ERX9 | HEMH_OCEIH  | -----IRHGRKPDPEALQDLKERYEAIGGIS -----PLAKITTE        | 62  |
| sp | Q71XF4 | HEMH_LISMF  | -----IRHGKHPSEEMIADLRGRYHAIGGLS -----PLAKITEA        | 61  |
| sp | Q8Y565 | HEMH_LISMO  | -----IRHGKHPSEEMIADLRGRYHAIGGLS -----PLAKITEA        | 61  |
| sp | Q929G2 | HEMH_LISIN  | -----IRHGKHPSEEMIADLRGRYHAIGGLS -----PLAKITEA        | 61  |
| sp | P64124 | HEMH_STAAM  | -----IRHGKRPSEELQDLKDRYEFIGGLS -----PLAGTTDD         | 61  |
| sp | P64125 | HEMH_STAAN  | -----IRHGKRPSEELQDLKDRYEFIGGLS -----PLAGTTDD         | 61  |
| sp | Q6G8A3 | HEMH_STAAS  | -----IRHGKRPSEELQDLKDRYEFIGGLS -----PLAGTTDD         | 61  |
| sp | P64126 | HEMH_STAAN  | -----IRHGKRPSEELQDLKDRYEFIGGLS -----PLAGTTDD         | 61  |
| sp | Q6GFM4 | HEMH_STAAR  | -----IRHGKRPSEELQDLKDRYEFIGGLS -----PLAGTTDD         | 61  |
| sp | Q8CNS1 | HEMH_STAEP  | -----IRRGGKPTSEELQDLKDRYEFIGGLS -----PLAGTTDR        | 61  |
| sp | Q81TU9 | HEMH2_BACAN | -----IRHGRKPSEELQDLIGRYKAIGGIS -----PLAKITKE         | 62  |
| sp | Q6HM28 | HEMH2_BACHK | -----IRHGRKPSEELQDLIGRYKAIGGIS -----PLAKITKE         | 62  |
| sp | Q63EK7 | HEMH2_BACCZ | -----IRHGRKPSEELQDLIGRYKAIGGIS -----PLAKITKE         | 62  |
| sp | Q73C08 | HEMH2_BACC1 | -----IRHGRKPSEELQDLIGRYKAIGGIS -----PLAKITKE         | 62  |
| sp | Q81GN7 | HEMH2_BACCR | -----IRHGRKPSEELQDLIGRYKAIGGIS -----PLAKITKE         | 62  |
| sp | Q9KDK9 | HEMH_BACHD  | -----IRHGRKPSQELLDLTERYEAIGGVS -----PLAKITDD         | 62  |
| sp | Q5WHT1 | HEMH_BACSK  | -----IRHGRKPSEELADLQERYEAIGGTS -----PLARITDE         | 62  |
| sp | Q72L32 | HEMH_THET2  | -----IRRGRRPSEELKELAERYEAIG-KS -----PLNEITLA         | 56  |
| sp | Q9RV98 | HEMH_DEIRA  | -----IRAGRVTSQAILDEITNNYRLIGGKS -----PLPEFTRA        | 66  |
| sp | Q97R30 | HEMH_STRPN  | -----IRRGVRPQDHEIQTLYDNYVRIG-GT -----PLQKITRQ        | 60  |
| sp | Q8DQ04 | HEMH_STRR6  | -----IRRGVRPQDHEIQTLYDNYVRIG-GT -----PLQKITRQ        | 60  |
| sp | Q8FTB1 | HEMH_COREF  | -----VTRGRGIPPERLDEVGAHYHFFGGVS -----PLNRLNKE        | 70  |
| sp | Q8NQA1 | HEMH_CORGL  | -----VTHGRGIPPERLDEVAVHYHFFGGIS -----PINALNRE        | 66  |
| sp | Q6NH66 | HEMH_CORDI  | -----VTRGRGIPPERLEEVAVHYRHFFGGIS -----PLNALNRE       | 69  |
| sp | Q740Y1 | HEMH_MYCPA  | -----VTRGRGVPPERLDHVAEHYLHFFGGVS -----PINGINRA       | 60  |

|    |        |            |                                       |          |    |
|----|--------|------------|---------------------------------------|----------|----|
| sp | P71765 | HEMH_MYCTU | -----VTRGRGVPAERLDAVAEHYLHFGGVS-----  | PINGINRT | 60 |
| sp | Q9CBM2 | HEMH_MYCLE | -----VTRGCNVPPERLDEVTKHYLHFGGVS-----  | PINGINLA | 60 |
| sp | Q5YU18 | HEMH_NOCA  | -----VTRGRGVPRARLEEVAQHYLHFGGVS-----  | PINALNRD | 60 |
| sp | O07401 | HEMH_MYCAV | -----AAACRGTSRPRRRTLPAFRRGVADQR-----  | HQPRADRA | 63 |
| sp | Q83H94 | HEMH_TROW8 | -----VTSGRGVPPERLYEVAEHYNHFGSGIS----- | PINDCNRR | 87 |
| sp | Q83FJ2 | HEMH_TROWT | -----VTSGRGVPPERLYEVAEHYNHFGSGIS----- | PINDCNRR | 87 |
| sp | Q6AHF2 | HEMH_LEIXX | -----VTRGRGILDERLEEVAQHYRHFGGVS-----  | PINDQNRA | 78 |
| sp | Q82KJ6 | HEMH_STRAW | -----VTRGRGIPRERLKEVQHYFLFGGIS-----   | PINDQNRA | 67 |
| sp | O50533 | HEMH_STRCO | -----VTRGRGIPKERLKEVQHYFLFGGVS-----   | PINDQNRA | 67 |
| sp | Q7UFZ7 | HEMH_RHOBA | -----VLRGKNVPRERMLEVAEHYKHFGGVS-----  | PINEQNRQ | 64 |
| sp | P72183 | HEMH_PROFR | -----VSGG-HIPDRLAEVEHHYARFGGVS-----   | PSNAQHRA | 60 |
| sp | Q9HLB8 | HEMH_THEAC | -----IFNGKPVPEVREENLRKYEMFGGRS-----   | PSNRIIES | 59 |
| sp | Q978U9 | HEMH_THEVO | -----IFGGKPVPKGVAAEENYRKYEMFGGLS----- | PSNRIIQS | 59 |

|    |        |             |                     |                         |     |
|----|--------|-------------|---------------------|-------------------------|-----|
| sp | P42043 | HEMH1_ARATH | QADAIKMSLQA-----    | KNIAANVYVGMRYWYPFTEEA   | 197 |
| sp | P42044 | HEMH_CUCSA  | QAQALKMALAE-----    | KNMSTNVYVGMRYWYPFTEEA   | 222 |
| sp | P42045 | HEMH_HORVU  | QANALKVALKS-----    | KNLEADIYVGMRYWYPFTEEA   | 216 |
| sp | O04921 | HEMH2_ARATH | QAEELRKCLWE-----    | KNVPAKVYVGMRYWHPFTEEA   | 208 |
| sp | O22101 | HEMH_ORYSA  | QAEALRKALCD-----    | KDIPAKVYVGMRYWHPFTEEA   | 189 |
| sp | Q8YQR8 | HEMH_ANASP  | QGEALKEQLHY-----    | LGQEQANIYVGMRYWHPYTEEA  | 109 |
| sp | P54225 | HEMH_SYNY3  | QASALTTTLER-----    | LGQDAKVYIGMRYWHPFTEEA   | 109 |
| sp | Q8DGU6 | HEMH_SYNEL  | QARALKDALEG-----    | IGIEANLYIGMRYWHPFTEEA   | 110 |
| sp | Q7VD58 | HEMH_PROMA  | QARELQSALRN-----    | RGINATSYVAMRYWHPFTEEA   | 109 |
| sp | Q7V2F5 | HEMH_PROMP  | QARELQSKLRD-----    | KGLNVTTYIAMRYWHPFTEEA   | 109 |
| sp | Q7V6C6 | HEMH_PROMM  | QARELQSLLRQ-----    | RGIDATSYVAMRYWHPFTEEA   | 109 |
| sp | Q7U5G0 | HEMH_SYNPX  | QARELQSLLRQ-----    | RLDATTYVAMRYWHPFTEEA    | 109 |
| sp | Q7NMC7 | HEMH_GLOVI  | QGRVLKALAA-----     | RLDIEVYVGMRYWHPFTEEA    | 109 |
| sp | Q9ZC84 | HEMH_RICPR  | QKLAITKELKEFI-----  | K-EDFIIFINMRYSTPFAKEVI  | 110 |
| sp | Q68VM9 | HEMH_RICTY  | QKLAITKKLKEIL-----  | K-EDFIIFISMRYSTPFAKEVI  | 110 |
| sp | Q92FV4 | HEMH_RICCN  | QKLALTEKLKQLI-----  | K-EDFAIFINMRYSAFFAKEVI  | 110 |
| sp | Q73FY6 | HEMH_WOLPM  | QANASELKNENR-----   | N-HVHKVFIAMRYWHPFADEVI  | 108 |
| sp | P57777 | HEMH_CAUCR  | QARALEAALALAM-----  | PGVEAKCFIAMRYWHPPLTDETA | 111 |
| sp | O67083 | HEMH_AQUAE  | QAKALQERLG-----     | EDYKVVVGMRYWKPYIKDAL    | 102 |
| sp | P22830 | HEMH_HUMAN  | QGEGMVKLLDELSP----- | NTAPHKYYIGFRYVHPLTEEA   | 174 |
| sp | P22315 | HEMH_MOUSE  | QGEGMVKLLDELSP----- | ATAPHKYYIGFRYVHPLTEEA   | 171 |
| sp | P22600 | HEMH_BOVIN  | QGEGMVKLLDELSP----- | HTAPHKYYIGFRYVHPLTEEA   | 167 |
| sp | O42479 | HEMH_CHICK  | QGEGMVKLLDSMSP----- | QTAPHKYYIGFRYVHPLTEEA   | 153 |
| sp | O57478 | HEMH_XENLA  | QGEGMVKLLDELSP----- | ATAPHKYYIGFRYVHPLTEEA   | 161 |
| sp | Q9V9S8 | HEMH_DROME  | QGQLMCEQLDRISP----- | ETAPHKHYVGFYVHPLTENTL   | 134 |
| sp | O59786 | HEMH_SCHPO  | QGSEMCKILDKKCP----- | ESAPHLPFVAFRYAPPLTEDML  | 139 |
| sp | P16622 | HEMH_YEAST  | QATEVCKILDKTCP----- | ETAPHKPYVAFRYAKPLTAETY  | 146 |
| sp | Q6APB0 | HEMH_DESPS  | QAEALEKSLQAHG-----  | NFTVTYAMRYWPPYCYDEAL    | 110 |
| sp | Q747F5 | HEMH_GEOSL  | QARALEVDLGDG-----   | YRCFVAMRYWKPSTMEAL      | 107 |
| sp | Q9ZKD4 | HEMH_HELPH  | LTERLNELDPS-----    | RFYTYAMRYTPPYASML       | 122 |
| sp | P56107 | HEMH_HELPY  | LTERLNELDPS-----    | RFYTYAMRYTPPYASML       | 122 |
| sp | Q7M7P9 | HEMH_WOLSU  | LIQKLQSLDPS-----    | RFYTYAMRYTPPMTDMAV      | 104 |
| sp | Q7VHH1 | HEMH_HELPH  | LTNKLNELDCK-----    | RFYTYAMRYTPPFAYQVL      | 95  |
| sp | Q9PI08 | HEMH_CAMJE  | LCDKLNKQDE-----     | FKFDFVNLVPPFATEIL       | 103 |
| sp | Q8DFM2 | HEMH_VIBVU  | QQVELQAKL-----      | NCPVEIGMTYGTSPVLDGV     | 111 |
| sp | Q7MMR4 | HEMH_VIBVY  | QQVELQAKL-----      | NCPVEIGMTYGTSPVLDGV     | 111 |
| sp | Q9KTB6 | HEMH_VIBCH  | QRDKLAELS-----      | QRPVELGMTYGEPSLLEGV     | 111 |
| sp | Q87RH3 | HEMH_VIBPA  | QAKKLAQHL-----      | DMPVELGMTYGNPSLQSGF     | 111 |
| sp | Q6LTE0 | HEMH_PHOPR  | QRQALEKQL-----      | NVPVALGMTYGTSPSIATGL    | 110 |
| sp | Q8EFF4 | HEMH1_SHEON | QAQKLATDLSATF-----  | NQTIPVELGMSYGNPSIESGF   | 132 |
| sp | Q8XD39 | HEMH_ECO57  | QQQALAQLRP-----     | ETPVALGMSYGNPSLES       | 111 |
| sp | P23871 | HEMH_ECOLI  | QQQALAQLRP-----     | EMPVALGMSYGNPSLES       | 111 |
| sp | Q8FK83 | HEMH_ECOL6  | QQQALAQLRP-----     | ETPVALGMSYGNPSLES       | 111 |
| sp | Q83SE5 | HEMH_SHIFL  | QQQALAQLRP-----     | DTPVALGMSYGNPSLES       | 111 |
| sp | Q8Z8T2 | HEMH_SALTI  | QQQALAARLP-----     | DTPVALGMSYGNPSLES       | 111 |
| sp | P37408 | HEMH_SALTY  | QQQALAARLP-----     | DTPVALGMSYGNPSLES       | 111 |
| sp | Q8ZC98 | HEMH_YERPE  | QQKALAARMP-----     | DIPVELGMSYGNPSLEAI      | 111 |
| sp | Q05338 | HEMH_YERPS  | QQKALAARMP-----     | DIPVELGMSYGNPSLEAI      | 111 |

|    |        |             |                                          |     |
|----|--------|-------------|------------------------------------------|-----|
| sp | P43413 | HEMH_YEREN  | QQKALAERMP-----EIPVELGMSYSGSPNLPDAI      | 111 |
| sp | Q6D7Z4 | HEMH_ERWCT  | QHQALAAAMP-----DTPVELGMSYSGSPSLRSAL      | 111 |
| sp | Q7N0P6 | HEMH_PHOLL  | QQKLLAERLA-----GIPVELGMNYGSPSLEQAI       | 111 |
| sp | P43868 | HEMH_HAEIN  | QKDALQAYLDNQ-----NIDTQVEIAMTYGNPSMQSAV   | 116 |
| sp | P57874 | HEMH_PASMU  | QQHALQTYFKQQ-----EKNIVVEVAMTYGEPKSIKSAI  | 115 |
| sp | Q65SV7 | HEMH_MANSM  | QKALLTEFFQQR-----QQNVIIEIGMTYGNPSMQYAI   | 115 |
| sp | Q8CWW4 | HEMH_STRMU  | QEKALQAHFDQS-----EHGVLVRATMAYSKPSISDVV   | 115 |
| sp | Q8D226 | HEMH_WIGBR  | QRNYLINKFP-----NFKIELGMRYGDPSICVAI       | 110 |
| sp | Q8EBZ7 | HEMH2_SHEON | QTAKLSDKLTADG-----HQVSVHLA--MRYGNPSVASTL | 118 |
| sp | Q6F7N0 | HEMH_ACIAD  | QTDALKRQLISHY-----PQLDLNIVPAMTYGNPVGQHL  | 119 |
| sp | Q7WGI0 | HEMH_BORBR  | QAAGVRQGLAARG-----VHAEVELAMRYGKPSIPAAI   | 145 |
| sp | Q7W515 | HEMH_BORPA  | QAAGVRQGLAARG-----VHAEVELAMRYGKPSIPAAI   | 145 |
| sp | Q7VVX8 | HEMH_BORPE  | QAAGVRQGLAARG-----VHAEVELAMRYGKPSIPAAI   | 145 |
| sp | Q62HD1 | HEMH_BURMA  | QVESVKPLFAANG-----YRVIVDYAMRYGTPSIADVL   | 138 |
| sp | Q63R43 | HEMH_BURPS  | QVESVKPLFAANG-----YRVIVDYAMRYGTPSIADVL   | 138 |
| sp | Q8XW32 | HEMH_RALSO  | QAHALQQQLLDAQG-----HDVVVACAMRYGNPSIP SVM | 130 |
| sp | Q7NV65 | HEMH_CHRVO  | QAKLLKGQLGEMG-----L-HNLAVDYAMRYGNPSIESVI | 130 |
| sp | Q82UK8 | HEMH_NITEU  | QTALVAALLEQQA-----D-SSLVVEYAMIIGNPSIAEKL | 128 |
| sp | Q9JVA5 | HEMH_NEIMA  | QAAALAKRMP-----DLIVRHAMTYGNPSVADVL       | 123 |
| sp | Q9K097 | HEMH_NEIMB  | QAAALAKRMP-----DLIVRHAMTYGNPSVADVL       | 123 |
| sp | Q8PEX0 | HEMH_XANAC  | LAGGLQAVMP-----DWHVEWAMRYGEPALRRTL       | 112 |
| sp | Q8P3H6 | HEMH_XANCP  | LTEGLQQVMP-----DWHVTWAMRYGAPALRRL        | 112 |
| sp | Q9PFU1 | HEMH_XYLFA  | IAEGLTQHLP-----DWRVAVAMRYGAPALTKAL       | 112 |
| sp | Q87B82 | HEMH_XYLFT  | IAEGLTQHLP-----DWRVAVAMRYGAPALTKAL       | 112 |
| sp | Q607T4 | HEMH_METCA  | LRDRLAADGR-----FAAVEIAMRYGNPSVRLKL       | 113 |
| sp | Q8U9F7 | HEMH_AGR5   | QGELMAAALKDFP-----NVVVDWAMRYGQPSIASRI    | 130 |
| sp | Q92M52 | HEMH_RHIME  | QAALMAEAFGGQP-----QVVVDWAMRYGQPSIASRI    | 125 |
| sp | Q93TG2 | HEMH_BRUME  | QGEKLAKALSDQP-----NVVVDWAMRYGQPSIESIT    | 138 |
| sp | Q98H61 | HEMH_RHILO  | QSEKLAELGDLDP-----DVTVDWAMRYGNPSTASVA    | 139 |
| sp | P28602 | HEMH_BRAJA  | QSDKLAALSDRD-----HVVVDWAMRYGNPSIKSGI     | 131 |
| sp | Q6NBF3 | HEMH_RHOPA  | QAEKLSASLGDRG-----HLIVDWAMRYGNPSLRDRI    | 131 |
| sp | Q59735 | HEMH_RHOCA  | QVRKLRAAVETRY-----GAGNVVDFCMRYGNPSTRDVL  | 136 |
| sp | P57779 | HEMH_ZYMMO  | QAQGLQKRMP-----NITVDYAMRYGTPSISSRL       | 119 |
| sp | Q833G5 | HEMH_ENTFA  | QMENLKN--ICP-----EVEVTIGMSYSEPSIETAL     | 109 |
| sp | Q9CFB4 | HEMH_LACLA  | QAKQLQD--MRE-----DFDVRFAMTYGEPRIDKVI     | 110 |
| sp | Q67T48 | HEMH_SYMTH  | QQAALQQRLEPE-----GIRVALGMTYGQPSVKSAI     | 111 |
| sp | Q88XC3 | HEMH_LACPL  | ICQQVQAALP-----DWNVRLAMTYGQPDIGATL       | 108 |
| sp | P57778 | HEMH_PSEFL  | LQQQMTAQWTQG-----PVELAMRYGEPSESIVL       | 108 |
| sp | Q888A2 | HEMH_PSESM  | LQQAMKKEWSHG-----PVELAMRYGEPSEIVL        | 108 |
| sp | Q88PV4 | HEMH_PSEPK  | LQAAMAEHWPHG-----PVEIAMRYGQPALPDVL       | 108 |
| sp | Q9HVD7 | HEMH_PSEAE  | LQEAMKPHWPHG-----PVELAMRYGQPAIEKVL       | 108 |
| sp | Q6MHT3 | HEMH_BDEBA  | FAALLQEELKDQF-----VVKVGLQYSEPSVESAL      | 110 |
| sp | Q83FA4 | HEMH_COXBU  | LRERVGETLGDDF-----CVALGMRYGKPSIETAL      | 115 |
| sp | Q6MAW8 | HEMH_PARUW  | VQTKLQMILGESF-----QVELAMRYGNPSIEEGL      | 111 |
| sp | Q7MXP4 | HEMH_PORGI  | KAIARALAHTR-----EVHVAMRYGKPAVADVL        | 120 |
| sp | Q824K8 | HEMH_CHLCV  | LAETLSSHLDAP-----VITFHRYLPDTHPHTIQQI     | 107 |
| sp | Q9Z7V1 | HEMH_CHLPN  | LAKTLSEILRAP-----VIPFHRYLPSTHEKTLAL      | 108 |
| sp | Q9PJQ6 | HEMH_CHLMU  | LAQNLSQELQAP-----VISFHRYLTETHQDTLAL      | 106 |
| sp | Q84492 | HEMH_CHLTR  | LAQNLSQELQAS-----VIPFHRYLPETHRETLQAL     | 106 |
| sp | Q8GCV0 | HEMH_LEPBI  | QAHALELALNERS-----SEQWNVKAMACGYPNMRDIE   | 116 |
| sp | Q81U22 | HEMH1_BACAN | QAKKLEKRLNEVD-----EVEYHMYLGLKHIEPFIEDAV  | 96  |
| sp | Q6HM97 | HEMH1_BACHK | QAKKLEKRLNEVD-----EVEYHMYLGLKHIEPFIEDAV  | 96  |
| sp | Q63ES4 | HEMH1_BACCZ | QAKKLEKRLNEVD-----EVEYHMYLGLKHIEPFIEDAV  | 96  |
| sp | Q73C98 | HEMH1_BACC1 | QAKKLEKRLNEVD-----EVEYHMYLGLKHIEPFIEDAV  | 96  |
| sp | Q81GW5 | HEMH1_BACCR | QAKKLEKRLNEVD-----EVEYHMYLGLKHIEPFIEDAV  | 96  |
| sp | P32396 | HEMH_BACSU  | QAHNLEQHLNEIQD-----EITFKAYIGLKHIEPFIEDAV | 97  |
| sp | Q8ERX9 | HEMH_OCEIH  | QTKALEKKLANQD-----QYEFKAYIGLKHIEPFIEDT   | 97  |
| sp | Q71XF4 | HEMH_LISMF  | QAYGLEKALNSQD-----EVEFKAYIGLKHIEPFIEDAV  | 96  |
| sp | Q8Y565 | HEMH_LISMO  | QAYGLEKALNSQD-----EVEFKAYIGLKHIEPFIEDAV  | 96  |
| sp | Q929G2 | HEMH_LISIN  | QAYGLEKALNSQD-----EVEFKAYIGLKHIEPFIEDAV  | 96  |
| sp | P64124 | HEMH_STAAM  | QADALVSALNKAYA-----DVEFKLYLGLKHISPFIEDAV | 96  |
| sp | P64125 | HEMH_STAAN  | QADALVSALNKAYA-----DVEFKLYLGLKHISPFIEDAV | 96  |
| sp | Q6G8A3 | HEMH_STAAS  | QADALVSALNKAYA-----DVEFKLYLGLKHISPFIEDAV | 96  |

|    |        |             |                                                     |     |
|----|--------|-------------|-----------------------------------------------------|-----|
| sp | P64126 | HEMH_STA AW | QADALVSALNKAYA-----DVEFKLYLGLKHISPFIEDAV            | 96  |
| sp | Q6GFM4 | HEMH_STAAR  | QADALVSALNKAYA-----DVEFKLYLGLKHISPFIEDAV            | 96  |
| sp | Q8CNS1 | HEMH_STAEP  | QAEALLEALNKEQD-----DVNFKLYIGLKHISPYIEEAV            | 96  |
| sp | Q81TU9 | HEMH2_BACAN | QAHKLTDSMNNMFT-----EYEFNCYLGLKHTAPFIEDAV            | 97  |
| sp | Q6HM28 | HEMH2_BACHK | QAHKLTDSMNNMFT-----EYEFNCYLGLKHTAPFIEDAV            | 97  |
| sp | Q63EK7 | HEMH2_BACCZ | QAHKLTDSMNNMFT-----EYEFNCYLGLKHTAPFIEDAV            | 97  |
| sp | Q73C08 | HEMH2_BACC1 | QAHKLTDSMNNIFT-----EYEFNCYLGLKHIAPFIEDAV            | 97  |
| sp | Q81GN7 | HEMH2_BACCR | QAHKLTDSMNNIFT-----EYEFTCYLGLKHTAPFIEDAV            | 97  |
| sp | Q9KDK9 | HEMH_BACHD  | QAIALEQKLNELYD-----DIEFKSYLGLKHIDPFIEDAV            | 97  |
| sp | Q5WHT1 | HEMH_BACSK  | QANGLAAVLNEQQE-----DIVFVPLYLGLKHIDPFIEDAV           | 97  |
| sp | Q72L32 | HEMH_THET2  | QAVRLQALLNLEAPPYKRLGLGPFPPRAPHGPARVYVGTKHWHPISIGEAV | 106 |
| sp | Q9RV98 | HEMH_DEIRA  | QVEATMEQLASTGR-----PLKAYIGMRNHWSPWIEDAV             | 99  |
| sp | Q97R30 | HEMH_STRPN  | EVALVEARLGSEYS-----VYFANKFSSPFIPDVI                 | 90  |
| sp | Q8DQ04 | HEMH_STRR6  | EVTTLVEARLGNEYS-----VYFANKFSSPFIPDVI                | 90  |
| sp | Q8FTB1 | HEMH_COREF  | IIANVKAEALARGY-----DIPVYFGNRNWKPFIDNEAA             | 103 |
| sp | Q8NQA1 | HEMH_CORGL  | IIANVEKELASRDH-----KLPVYFGNRNWKPFIDNEAA             | 99  |
| sp | Q6NH66 | HEMH_CORDI  | IIGNIEVLSSRGL-----EIPVYFGNRNWHPFVNDTA               | 102 |
| sp | Q740Y1 | HEMH_MYCPA  | LIEQLR-----AAQ-----DLPVYFGNRNWEPYVEDTV              | 88  |
| sp | P71765 | HEMH_MYCTU  | LIAELE-----AQQ-----ELPVYFGNRNWEPYVEDTV              | 88  |
| sp | Q9CBM2 | HEMH_MYCLE  | LVNELQ-----VEL-----DLPVYFGNRNWEPYIEDSV              | 88  |
| sp | Q5YU18 | HEMH_NOCFA  | IIAGVERELDEAGI-----DLPVYFGNRNWHPMVEDTV              | 93  |
| sp | 007401 | HEMH_MYCAV  | AAGRPE---PARLL-----RQPQLGALRRRH---GEGH              | 90  |
| sp | Q83H94 | HEMH_TROW8  | LRGALEKELFSRGI-----RIPVLWANRNWQPQLEEV               | 120 |
| sp | Q83FJ2 | HEMH_TROWT  | LRGALEKELFSRGI-----RIPVLWANRNWQPQLEEV               | 120 |
| sp | Q6AHF2 | HEMH_LEIXX  | LKAALEAELASRGI-----DLPVLWGNRNWDPYLADAL              | 111 |
| sp | Q82KJ6 | HEMH_STRAW  | LLDALRKDFAEHGL-----NLPVYWGNRNWAPYLTDTL              | 100 |
| sp | 050533 | HEMH_STRCO  | LLDALRKDFAEHGL-----DLPVYWGNRNWAPYLTDTL              | 100 |
| sp | Q7UFZ7 | HEMH_RHOBA  | LIAALQKRFDANGI-----DLPIYWGNRNWDPYFADTL              | 97  |
| sp | P72183 | HEMH_PROFR  | LAAALGEALVARGI-----DVP IANANRHSMPYMDQAL             | 93  |
| sp | Q9HLB8 | HEMH_THEAC  | IARKLH-EKIG--D-----DMDVILAYKHWNPISIEEAV             | 89  |
| sp | Q978U9 | HEMH_THEVO  | IRDRLQ-KRFDQSG-----DVDVFTAFKHWYPSIGEVV              | 91  |

|    |        |             |                                                     |     |
|----|--------|-------------|-----------------------------------------------------|-----|
| sp | P42043 | HEMH1_ARATH | QQIKKD-KITRLVVLPLYPQYSISTTGSSIRVLQDLFR--KDPYLAGVPV  | 244 |
| sp | P42044 | HEMH_CUCSA  | QQIKRD-GITRLVVLPLYPQYSISTTGSSIRVLQKMF--EDAYLSSLPV   | 269 |
| sp | P42045 | HEMH_HORVU  | DQIKKD-KITKLVVLPLYPQYSISTSGSSIRVLQNIWK--EDPYFAGLPI  | 263 |
| sp | 004921 | HEMH2_ARATH | EQIKRD-GITKLVVLPLYPQFSISTSGSSLRLLERIFR--EDEYLVNMQH  | 255 |
| sp | 022101 | HEMH_ORYSA  | EQIKRD-GITKLVVLPLYPQFSISTSGSSLRLLLEGIFR--EDEYLVNMQH | 236 |
| sp | Q8YQR8 | HEMH_ANASP  | ALLTQD-NLDNLVILPLYPQFSISTSGSSFRLLELWQ--EDPKLQRLLEY  | 156 |
| sp | P54225 | HEMH_SYNY3  | EKIKGD-RLQRLVILPLYPHFSISTSGSSFRVLEEMWH--NDPSLRQLDY  | 156 |
| sp | Q8DGU6 | HEMH_SYNEL  | AQIKAD-QIRELVILPLYPQFSISTSGSSFRLLESLEWN--QDPELQKIRY | 157 |
| sp | Q7VD58 | HEMH_PROMA  | EDIKAD-NINEVVVLPLYPHFSISTSGSSFRELRLRE--VDKEFQKLSI   | 156 |
| sp | Q7V2F5 | HEMH_PROMP  | ADMKAD-GVDQIVVLPLYPHFSISTSGSSFRELKLRD--SDSEFQKIPM   | 156 |
| sp | Q7V6C6 | HEMH_PROMM  | ADIKAD-GIDQVVVLPLYPHFSISTSGSSFRELQRLRQ--TDESFRKLPI  | 156 |
| sp | Q7U5G0 | HEMH_SYNPX  | ADMKAD-GMDEVVVLPLYPHFSISTSGSSFRELQRLRQ--SDAEFQKLP   | 156 |
| sp | Q7NMC7 | HEMH_GLOVI  | RKIKAD-GIRRLVLLPLYPQYSISTSGSSFKLLDQIWA--RDPSLKAIER  | 156 |
| sp | Q9ZC84 | HEMH_RICPR  | GQIKEY-NPSEIILLPLYPQFSSTTTGSSVKNFLQNLID-----IDIPI   | 152 |
| sp | Q68VM9 | HEMH_RICTY  | CQIKEY-NPSEIILLPLYPQFSSTTTGSSVKNFLQNLID-----IDIPI   | 152 |
| sp | Q92FV4 | HEMH_RICCN  | GQIKKY-NPSEIILLPLYSQFSSTTTGSSVKNFLQNLID-----IDIPI   | 152 |
| sp | Q73FY6 | HEMH_WOLPM  | ESVKQF-DPDEVILLPLYPQYSTTTTLSSIENWQKNAK--RY--GLKCNT  | 153 |
| sp | P57777 | HEMH_CAUCR  | RQVAAF-APDQVLLPLYPQFSTTTTGSLLKAWKTYK-----GSGVQ      | 153 |
| sp | 067083 | HEMH_AQUAE  | SELLKE-GINEVILLPLYPQYKSTTTTGSFAFNEFERSK--ALK-ADHIKV | 148 |
| sp | P22830 | HEMH_HUMAN  | EEMERD-GLERAIIFTQYPQYSCSTTGSSLNAIYRYN--QVGRKPTMKW   | 221 |
| sp | P22315 | HEMH_MOUSE  | EEMERD-GLERAIIFTQYPQYSCSTTGSSLNAIYRYN--EVGQKPTMKW   | 218 |
| sp | P22600 | HEMH_BOVIN  | EEMERD-GLERAVIFTQYPQYSCSTTGSSLNAIYRYN--EVGRKPTMKW   | 214 |
| sp | 042479 | HEMH_CHICK  | EEMEDD-GIERAIIFTQYPQYSCSTTGSSLNAIYRYN--KKGKPKMKW    | 200 |
| sp | 057478 | HEMH_XENLA  | EEMERD-GVERAIIFTQYPQYSCSTTGSSLNAIYRYN--AKGTQPKMKW   | 208 |
| sp | Q9V9S8 | HEMH_DROME  | AEIEKD-KPERVILFSQYPQYSCATSGSSFNSIFTHYR--SNNLPSDIKW  | 181 |
| sp | 059786 | HEMH_SCHPO  | DELKKA-NVSRVAFSQQYQWSCATSGASLNELRRKLI--EKGMEKDFEW   | 186 |
| sp | P16622 | HEMH_YEAST  | KQMLKD-GVKKAVAFSQQYPHFSYSTTGSSINELWRQIK--ALDSERSISW | 193 |
| sp | Q6APB0 | HEMH_DESPS  | DYLLSK-GVERLVALSLYPHYSKATTGSSLTQLHKTLC--KKN--ISLPL  | 155 |
| sp | Q747F5 | HEMH_GEOSL  | AAIRRE-GISRVIALSYPHYSRATTGSSVNELKRVLS--QSG--VQFQM   | 152 |
| sp | Q9ZKD4 | HEMH_HELPJ  | QDLALK-EIESLVFFSMYPQYSSTTTLSSFNDAFNALK--SLET-PRPKV  | 168 |

|    |        |             |                                                     |     |
|----|--------|-------------|-----------------------------------------------------|-----|
| sp | P56107 | HEMH_HELPHY | QDLALK-EVESLVFFSMYPQYSSTTTLSSFNDAFNALK--SLET-FRPKV  | 168 |
| sp | Q7M7P9 | HEMH_WOLSU  | RELAQK-EIEEVTLFSLYPQYSTTTTLSSI-EEFHKQC--ALLS-YFPKT  | 149 |
| sp | Q7VHH1 | HEMH_HELHP  | EDIKTQ-GIQSVVLFSLYPQFSYSTIASSLIDAKAALQ--KLA--FTPTL  | 140 |
| sp | Q9PI08 | HEMH_CAMJE  | QKYTLN-ASDEIILFPLYPHHSCTTTSLEVLQNEIS--KQK--IQAKV    | 148 |
| sp | Q8DFM2 | HEMH_VIBVU  | NKLQAQ-GVDEICVPLPLYPQYSGTTTGAAYDALAHALR--KVAV--VPSI | 156 |
| sp | Q7MMR4 | HEMH_VIBVY  | NKLQAQ-GVDEICVPLPLYPQYSGTTTGAAYDALAHALR--KVAV--VPSI | 156 |
| sp | Q9KTB6 | HEMH_VIBCH  | RKLQQQ-GVEQIVVLPLYPQYSATTTAAVFDGLAKALR--QLPV--VPEL  | 156 |
| sp | Q87RH3 | HEMH_VIBPA  | EALIAQ-GVEEVIVLPLYPQYSGTTTAAVSDGITKAFK--QLPV--MPAF  | 156 |
| sp | Q6LTE0 | HEMH_PHOPR  | AELKQQ-GCNKVLVPLPLYPQYSGTTTAAVFDRIAKELK--QOPH--IPEL | 155 |
| sp | Q8EFF4 | HEMH1_SHEON | AKLKAQ-GAERIVVLPLYPQYSCSTVASVFDVAHYLT--RVRD--IPEL   | 177 |
| sp | Q8XD39 | HEMH_ECO57  | DELLAE-HVDHIVVLPLYPQFSCSTVGAVWDELARILA--RKRS--IPGI  | 156 |
| sp | P23871 | HEMH_ECOLI  | DELLAE-HVDHIVVLPLYPQFSCSTVGAVWDELARILA--RKRS--IPGI  | 156 |
| sp | Q8FK83 | HEMH_ECOL6  | DELLAE-HVDHIVVLPLYPQYSCSTVGAVWDELARILA--RKRS--IPGI  | 156 |
| sp | Q83SE5 | HEMH_SHIFL  | DELLAE-HVDHIVVLPLYPQFSCSTVGAVWDELARILA--RKRS--IPGI  | 156 |
| sp | Q8Z8T2 | HEMH_SALTI  | DELLAS-DVDHIVVLPLYPQYSCSTVGAVWDELGRILA--RKRR--IPGI  | 156 |
| sp | P37408 | HEMH_SALTY  | DELLAS-DVDHIVVLPLYPQYSCSTVGAVWDELGRILA--RKRR--IPGI  | 156 |
| sp | Q8ZC98 | HEMH_YERPE  | EKLLAQ-GVTNLVILPLYPQYSCSTSAAVWDAVARVLK--GYRR--LPSI  | 156 |
| sp | Q05338 | HEMH_YERPS  | EKLLAQ-GVTNLVILPLYPQYSCSTSAAVWDAVARVLK--GYRR--LPSI  | 156 |
| sp | P43413 | HEMH_YEREN  | DKLLAQ-GVTKLVPLPLYPQYSCSTSAAVWDAVARILK--GYRR--LPSI  | 156 |
| sp | Q6D7Z4 | HEMH_ERWCT  | DKLLAQ-GVTQLVPLMPYPQYSCSTTAAVWDGLAAQLR--DNRQ--LPAI  | 156 |
| sp | Q7N0P6 | HEMH_PHOLL  | DNLLKQ-NVEQLIVLPLYPQYSGSSAAVFDGVSLLVQ--KYRT--IPGM   | 156 |
| sp | P43868 | HEMH_HAEIN  | KNLLKN-QVERIIVLPLYPQYSSSTTGAVFDAFANALK--EERG--LLPF  | 161 |
| sp | P57874 | HEMH_PASMU  | QRLSTQ-QVDNLIVFPLYPQYSSSTTGAVFDFAAQVLK--TQRG--VLPF  | 160 |
| sp | Q65SV7 | HEMH_MANSM  | DNLIEQ-KVDKIIVLPLYPQYSSTTTAPVFDVFAQALK--RHRH--IVPF  | 160 |
| sp | Q8CW44 | HEMH_STRMU  | DEFLKE-KVAKMIVLPLFPQYSSSTTAAIFDAFAQSLK--KKKD--IPPF  | 160 |
| sp | Q8D226 | HEMH_WIGBR  | KKMKIYNVNKLIILMPYPQYSCSTTASVLDVCEVIK--KYRN--IPSI    | 156 |
| sp | Q8EBZ7 | HEMH2_SHEON | REMHKQ-GIDKLVPLPLYPQYAAPTGTSAFDAIAKELS--QWRY--LPSL  | 163 |
| sp | Q6F7N0 | HEMH_ACIAD  | KDLAAS-PQEHVILLPLFPQYSATSTAPLYDAFANWIP--KQRH--LPGL  | 164 |
| sp | Q7WG10 | HEMH_BORBR  | TALRER-GCDHILAVPLYPQYAASSTATVVDVAVTRHAG--RLRD--QPAL | 190 |
| sp | Q7W515 | HEMH_BORPA  | TALRER-GCDHILAVPLYPQYAASSTATVVDVAVTRHAG--RLRD--QPAL | 190 |
| sp | Q7VVX8 | HEMH_BORPE  | TALRER-GCDHILAVPLYPQYAASSTATVVDVAVTRHAG--RLRD--QPAL | 190 |
| sp | Q62HD1 | HEMH_BURMA  | AQLKRA-GAERVLLLPLFPQYSSSTTATAFDAFAALG--RMRN--QPEV   | 183 |
| sp | Q63R43 | HEMH_BURPS  | AQLKRA-GAERVLLLPLFPQYSSSTTATAFDAFAALG--RMRN--QPEV   | 183 |
| sp | Q8XW32 | HEMH_RALSO  | QTLRKQ-GVERILVPLMPYPQYSGTTTATAFDEVFRVMG--QMRN--QPEL | 175 |
| sp | Q7NV65 | HEMH_CHRVO  | GKMREQ-GVERLLLLPLYPQYAASSSATALDEAFRVLS--RLRN--MPEV  | 175 |
| sp | Q82UK8 | HEMH_NITEU  | QQMKVQ-GCDRILVPLFPQYAASSTGCVLDGVFSELR--KMRN--IPDI   | 173 |
| sp | Q9JVA5 | HEMH_NEIMA  | SELKAQ-GAGRLLVIPMPYPQYAASSGAADVCKVCEQLL--LQRN--QMSV | 168 |
| sp | Q9K097 | HEMH_NEIMB  | SELKAQ-GAGRLLVIPMPYPQYAASSGAADVCKVCEQLL--LQRN--QMSV | 168 |
| sp | Q8PEX0 | HEMH_XANAC  | DRLRAR-GIKRIVVLPLYPQYSTTTTASIQD-VVDAWR--TSAP--EIAV  | 156 |
| sp | Q8P3H6 | HEMH_XANCP  | DGLRAR-GIKRIVVLPLYPQYSTTTTASIQD-VVDAWR--PSAP--EIAV  | 156 |
| sp | Q9PFU1 | HEMH_XYLFA  | DALQAQ-QVRRIVILPLYPQYSTTTTASVQD-VVEAWC--KRTP--QVQV  | 156 |
| sp | Q87B82 | HEMH_XYLFT  | DALQAQ-QVRRIVILPLYPQYSTTTTASVQD-VVEAWC--KRTP--QVQV  | 156 |
| sp | Q607T4 | HEMH_METCA  | EELRNR--VETIVVLPLYPQYSAATTGSADFVCDTLK--TWRH--IPSL   | 157 |
| sp | Q8U9F7 | HEMH_AGR75  | DALKEQ-GCEKILLFPLYPQYAASSTATVNDKAFEHLM--KLRW--QPAI  | 175 |
| sp | Q92M52 | HEMH_RHIME  | EALQKA-GCERILVPLYPQYAASSTATVNDKAFEALL--KMRW--QPAL   | 170 |
| sp | Q93TG2 | HEMH_BRUME  | DRLQQQ-GCERIVIFPLYPQYSATTTATVNDKFFEALM--KKRF--MPAI  | 183 |
| sp | Q98H61 | HEMH_RHILO  | ERLVAQ-GCDRILSFPLYPQYSATTTATANDQLFRALM--KLRR--APAI  | 184 |
| sp | P28602 | HEMH_BRAJA  | DALIAE-GCDRILAVPLYPQYSASTSATVCDDEVFRVLA--RLRA--QPTL | 176 |
| sp | Q6NBF3 | HEMH_RHOPA  | EALVAK-GCTRLVPLYPQYSAATSATVCDQAFRVLR--ELRA--QPTL    | 176 |
| sp | Q59735 | HEMH_RHOCA  | DDMLAQ-GCERILFPLYPQYAGATSATANDQFFRALM--QVKR--QPAA   | 181 |
| sp | P57779 | HEMH_ZYMMO  | EKLIAF-RCRILLAPLYPQYSAASTATVQDEAYRYLQ--KIRW--QPNL   | 164 |
| sp | Q833G5 | HEMH_ENTFA  | DTLLSK-EIEELNVIPLYPQYSGTTVGSVFDVSMNYFI--KSDR--IVDI  | 154 |
| sp | Q9CFB4 | HEMH_LACLA  | AEMKES-GVEEITVPLPLYPQYSLTTVEPVIQQVKKIDD--K-----I    | 149 |
| sp | Q67T48 | HEMH_SYMTH  | EELRGW-GVRRLLVPLFPQYSSTTTAAVWSKVQKALD--GWRD--LPEQ   | 156 |
| sp | Q88XC3 | HEMH_LACPL  | KAMVAD-GCEKPIILPLFPQYQTQSTHGGIHRQVEATGL--P-----H    | 147 |
| sp | P57778 | HEMH_PSEFL  | TRLAQG-GISKVTLAPLYPQFADSTVTTVIEEARRVVR--DKQL--DLQF  | 153 |
| sp | Q888A2 | HEMH_PSESM  | TRLSEQ-GFKKVTLAPLYPQFADSTVTTVIEEAKRVVR--AKSL--KMQF  | 153 |
| sp | Q88PV4 | HEMH_PSEPK  | ARLAAQ-GVRKVTLAPLYPQFADSTVTTVIEQAKQTVS--EHQL--PLQM  | 153 |
| sp | Q9HVD7 | HEMH_PSEAE  | LDLARR-GIRRVTLAPLYPQFADSTTTTAEQEVRRVIA--AHRL--GLEV  | 153 |
| sp | Q6MHT3 | HEMH_BDEBA  | KDLQQA-GVDEILVAPMPFQYAEATNGSSFKLAERMAK--KLHL--TAPL  | 155 |
| sp | Q83FA4 | HEMH_COXBU  | KKLQEA-QCRQLIVLPLFPQYSTSTTASALEEVR-----AKNS--FKEM   | 156 |
| sp | Q6MAW8 | HEMH_PARUW  | ERLKLA-NVKEIVIFPLFPQYASATTGSVHQEVMKHLQ--QWQN--IPTL  | 156 |
| sp | Q7MXP4 | HEMH_PORGI  | KELPHG---RSLVVLPLFPHYAMSSYETAVEHCKAEIR--RLCP--NLSF  | 163 |

|    |        |             |                                                    |                                           |     |
|----|--------|-------------|----------------------------------------------------|-------------------------------------------|-----|
| sp | Q824K8 | HEMH_CHLCV  | KTLGDF----                                         | PIVGVPLFPHFYAVTGSIVRFIHNQLP--LLNI--S---   | 146 |
| sp | Q9Z7V1 | HEMH_CHLPN  | RTLHTR----                                         | HVIGIPLFPHFYTSVTGSIVRFFMKHVP--EIPi--S---  | 147 |
| sp | Q9PJQ6 | HEMH_CHLMU  | RESAG----                                          | DIIGIPLFPHFYFAVTGSIIRFFLERIP--EKPM--A---  | 144 |
| sp | Q84492 | HEMH_CHLTR  | QESQG----                                          | SIVGIPLFPHFYFAVTGSIIRFFLQHLF--EKPI--S---  | 144 |
| sp | Q8GCV0 | HEMH_LEPBI  | FGKPNQ----                                         | DTVYLPPLYPQFSRSTVLSLAILLETKFG--ECPV--GS-G | 157 |
| sp | Q81U22 | HEMH1_BACAN | KEMHND-GIQDAIALVLAPHYSTFSVKSIVGRAQEEAE----         | KLGN-LTI                                  | 140 |
| sp | Q6HM97 | HEMH1_BACHK | KEMHND-GIQDAIALVLAPHYSTFSVKSIVGRAQEEAE----         | KLGN-LTI                                  | 140 |
| sp | Q63ES4 | HEMH1_BACCZ | KEMHND-GIQDAIALVLAPHYSTFSVKSIVGRAQEEAE----         | KLGN-LTI                                  | 140 |
| sp | Q73C98 | HEMH1_BACC1 | KDMHND-GIQDAIALVLAPHYSTFSVKSIVGRAQEEAE----         | KLGN-LTI                                  | 140 |
| sp | Q81GW5 | HEMH1_BACCR | KDMHND-GIQDAIALVLAPHYSTFSVKSIVGRAQEEAE----         | KLGN-LTI                                  | 140 |
| sp | P32396 | HEMH_BACSU  | AEMHKD-GITEAVSIVLAPHFSTFVSQSYNKRakeEAE----         | KLGG-LTI                                  | 141 |
| sp | Q8ERX9 | HEMH_OCEIH  | EEMAKD-GIKEAISLVLAPHYSTFSVKSYNKRANETAE----         | KYG--IQL                                  | 140 |
| sp | Q71XF4 | HEMH_LISMF  | EAMHKD-GIEEASIVLAPHYSSFSVEAYNKRAKDAAD----          | KLGG-LRI                                  | 140 |
| sp | Q8Y565 | HEMH_LISMO  | EAMHKD-GIEEASIVLAPHYSSFSVEAYNKRAKEAAD----          | KLGG-PRI                                  | 140 |
| sp | Q929G2 | HEMH_LISIN  | EAMHKD-GIEEASIVLAPHYSSFSVEAYNKRAKDAAD----          | KLGG-IHI                                  | 140 |
| sp | P64124 | HEMH_STAAM  | EQMHND-GITEAITVVLAPHYSSFSVGSYDKRADEEAA----         | KYG--IQL                                  | 139 |
| sp | P64125 | HEMH_STAAN  | EQMHND-GITEAITVVLAPHYSSFSVGSYDKRADEEAA----         | KYG--IQL                                  | 139 |
| sp | Q6G8A3 | HEMH_STAAS  | EQMHND-GITEAITVVLAPHYSSFSVGSYDKRADEEAA----         | KYG--IQL                                  | 139 |
| sp | P64126 | HEMH_STAAW  | EQMHND-GITEAITVVLAPHYSSFSVGSYDKRADEEAA----         | KYG--IQL                                  | 139 |
| sp | Q6GFM4 | HEMH_STAAR  | EQMHND-GITEAITVVLAPHYSSFSVGSYDKRADEEAA----         | KYG--IQL                                  | 139 |
| sp | Q8CNS1 | HEMH_STAEP  | EQMHND-GIKEAVTVLAPHYSSFSVGSYDQRAQEKAD----          | EYG--IQL                                  | 139 |
| sp | Q81TU9 | HEMH2_BACAN | EEMKRD-GIEQAISIVLAPHYSTFSIKAYNERAIRLSE----         | EIGG-PVI                                  | 141 |
| sp | Q6HM28 | HEMH2_BACHK | EEMKRD-GIEQAISIVLAPHYSTFSIKAYNERAIRLSE----         | EIGG-PVI                                  | 141 |
| sp | Q63EK7 | HEMH2_BACCZ | EEMKRD-GIEQAISIVLAPHYSTFSIKAYNERAIRLSE----         | EIGG-PVI                                  | 141 |
| sp | Q73C08 | HEMH2_BACC1 | EEMKRD-GIEQAISIVLAPHYSTFSIKAYNDRAIRLSE----         | EIGG-PVI                                  | 141 |
| sp | Q81GN7 | HEMH2_BACCR | EEMKRN-GIEQTISIVLAPHYSTFSIKAYNDRAIRLSK----         | EIGG-PVI                                  | 141 |
| sp | Q9KDK9 | HEMH_BACHD  | EQMKED-GVQEAVSIVLAPHFSTFVSVKSIVNGRAHEESK----       | KIGG-PRI                                  | 141 |
| sp | Q5WHT1 | HEMH_BACSK  | QKMKND-GIETAVSIVLAPHFSTFVSQSYNKRakeEAD----         | RIGG-PTI                                  | 141 |
| sp | Q72L32 | HEMH_THET2  | AAMHED-GVRRVAIVAAAPHYSLRSVAEYREKVDLSALK----        | TLPEPIDF                                  | 151 |
| sp | Q9RV98 | HEMH_DEIRA  | REMLDD-GIEQAIAIVLAPQYSSLSVAKYQKKIKAALE----         | MNHGHIDF                                  | 144 |
| sp | Q97R30 | HEMH_STRPN  | GQMEAD-GIEQCICLILEPHYSFYVMGYEKFLSKQ-----           | IQF                                       | 129 |
| sp | Q8DQ04 | HEMH_STRR6  | GQMEAD-GIEQCICLILEPHYSFYVMGYEKFLSKQ-----           | IQF                                       | 129 |
| sp | Q8FTB1 | HEMH_COREF  | EQMAAD-GIRNALVFATSAGGYSGCRQYHEDIQGMRAHLEEIGAPEVTF  |                                           | 152 |
| sp | Q8NQA1 | HEMH_CORGL  | EQMADD-GVKNALVLATSAGGYSGCRQYQEDIQGMIKHLESQGG--SITF |                                           | 147 |
| sp | Q6NH66 | HEMH_CORDI  | EKMVRD-GVRNVAVFATSAGGYSGCRQYDEDIVRMNHHEEKELPTLNC   |                                           | 151 |
| sp | Q740Y1 | HEMH_MYCPA  | KVMRDN-GIRRAAVFTTSAWGSYSSCTQYVEDIARAR---           | TAAGTGAPEL                                | 134 |
| sp | P71765 | HEMH_MYCTU  | TAMRDN-GVRRAAVFATSAGGYSYSSCTQYVEDIARAR---          | RAAGRDAPEL                                | 134 |
| sp | Q9CBM2 | HEMH_MYCLE  | VTMRDD-GIRCAAVFITSAWGSYSSCTRYVEAIARAR---           | RRAGTGAPNL                                | 134 |
| sp | Q5YU18 | HEMH_NOCFA  | AEMARD-GVTGALVFPPTSAWGSYSGCRQYHEDIERAR---          | AAVGAAPHL                                 | 139 |
| sp | O07401 | HEMH_MYCAV  | TRQRDS-ACRGVHHLRLERLQLHAVRRGHRPGAHG-----           | RAGRART                                   | 133 |
| sp | Q83H94 | HEMH_TROW8  | REAYDR-GFRAFLTLFTSAYSCYSSCRQYREDIAHAVERAGLSGR--IIV |                                           | 167 |
| sp | Q83FJ2 | HEMH_TROWT  | REAYDR-GFRAFLTLFTSAYSCYSSCRQYREDIAHAVERAGLSGR--IIV |                                           | 167 |
| sp | Q6AHF2 | HEMH_LEIXX  | TEADQR-GFTKLIAVATSAYSSYSSCRQYREDFARALRETGLEGR--IQI |                                           | 158 |
| sp | Q82KJ6 | HEMH_STRAW  | REMAAD-GRRRILVLATSAYASYSGCRQYRENLAGALATLEAEGLEVPRV |                                           | 149 |
| sp | O50533 | HEMH_STRCO  | REMVGD-GRRRILVLATSAYASYSGCRQYRENLAGALALESEGLPLPKI  |                                           | 149 |
| sp | Q7UFZ7 | HEMH_RHOBA  | RQMKAD-GKKRSLAFFTSMFSCYSGCRQYRENIIQAR---           | EEVGEAPLV                                 | 143 |
| sp | P72183 | HEMH_PROFR  | ADLQSR-GIRRVLTLPVTPYASYSGCRAYRELLAGTR--IDDEGRPALQV |                                           | 141 |
| sp | Q9HLB8 | HEMH_THEAC  | KGLG---SYDNIVAIPLFSFYSONVKDSYLNPLESALR----         | RYGFSPLR                                  | 132 |
| sp | Q978U9 | HEMH_THEVO  | PDLK---GYDNIVSIPLFSFFSENKASYKPLAEALE----           | KNDIRTKM                                  | 134 |

|    |        |             |                                        |      |     |
|----|--------|-------------|----------------------------------------|------|-----|
| sp | P42043 | HEMH1_ARATH | AIKSWYQRRGYVNSMADLIEKELQTFSDPK-----    | EVMI | 279 |
| sp | P42044 | HEMH_CUCSA  | SIIKSWYQREGYIKSMADLMQAEKLNKFNANPQ----- | EVMI | 304 |
| sp | P42045 | HEMH_HORVU  | SIIESWYQREGYVKSADLIEKELSVFSNPE-----    | EVMI | 298 |
| sp | O04921 | HEMH2_ARATH | TVIPSWYQREGYIKAMANLIQSELGKFGSPN-----   | QVVI | 290 |
| sp | O22101 | HEMH_ORYSA  | TVIPSWYQREGYIKAMATLIEKELRTFSEPO-----   | KVMI | 271 |
| sp | Q8YQR8 | HEMH_ANASP  | TVIPSWYKEPGYLQAMAEIRQEIEQFPHPD-----    | QVHV | 191 |
| sp | P54225 | HEMH_SYNY3  | SLIPSWYDHPGYLQAMADLIAQELKKFPNPD-----   | QAHV | 191 |
| sp | Q8DGU6 | HEMH_SYNEL  | TLIPSWYNHPGYVAAMADLIRQELDRCPNPD-----   | EAVI | 192 |
| sp | Q7VD58 | HEMH_PROMA  | RCIRSWFDNTGYIASMAELIEQEISSCESPN-----   | AAHI | 191 |
| sp | Q7V2F5 | HEMH_PROMP  | RCVRSWFSQSGYLKSMVELISEQISLCESPD-----   | SAHI | 191 |
| sp | Q7V6C6 | HEMH_PROMM  | RCIRSWYDHPGYVRAMAEIAEQVRLSDVPE-----    | EAQV | 191 |
| sp | Q7U5G0 | HEMH_SYNPX  | RCIRSWFDHPGYIKAMAEIAEVRNSDDPE-----     | KAHV | 191 |

|    |        |             |                                             |     |
|----|--------|-------------|---------------------------------------------|-----|
| sp | Q7NMC7 | HEMH_GLOVI  | ITINSWYSRPGYIRAMGERVREGLDKFDNPD-----GVHI    | 191 |
| sp | Q9ZC84 | HEMH_RICPR  | KTICCCYIEEDFIKAHVSLIKE--KLYDKN-----FRI      | 183 |
| sp | Q68VM9 | HEMH_RICTY  | KTICCCYIEEDFIKAHVSLIKE--KLYDKN-----FRI      | 183 |
| sp | Q92FV4 | HEMH_RICCN  | KTICCCYPLEKDFIKAHVSLIKE--KLYDKN-----FRI     | 183 |
| sp | Q73FY6 | HEMH_WOLPM  | KMIHRYDNDQDFIEAHTNLIKAKYYKLARKIG-----KPRV   | 188 |
| sp | P57777 | HEMH_CAUCR  | TTVGCYPTTEGGLIEAHARMIRESWEKAGSPT-----NIRL   | 188 |
| sp | O67083 | HEMH_AQUAE  | KKIEHFYDHPYLIKAWAEQIKQS---VEKPE-----EYHF    | 180 |
| sp | P22830 | HEMH_HUMAN  | STIDRWPTHLLIQCFFADHILKELDHFPLEKR-----SEVVI  | 258 |
| sp | P22315 | HEMH_MOUSE  | STIDRWPTHPLLIQCFFADHILKELNHFPEEKR-----SEVVI | 255 |
| sp | P22600 | HEMH_BOVIN  | STIDRWPTHPLLIQCFFADHILKELDHFPEEKR-----REVVI | 251 |
| sp | O42479 | HEMH_CHICK  | SIIDRWPTHPLLIQCFFADHIQKELDLFPPDKR-----KDVVI | 237 |
| sp | O57478 | HEMH_XENLA  | SVIDRWPTHPLLIQCFFADHIQKELNMFADKR-----GEVVI  | 245 |
| sp | Q9V9S8 | HEMH_DROME  | SIIDRWGTHPLLIKTFAQRIRDELAKFVETKR-----NDVVI  | 218 |
| sp | O59786 | HEMH_SCHPO  | SIVDRWPLQOGLINAFANIETLKTYPEDVR-----DDVVI    | 223 |
| sp | P16622 | HEMH_YEAST  | SVIDRWPTNEGLIKAFSENI TKKLQEFQPVR-----DKVVL  | 230 |
| sp | Q6APB0 | HEMH_DESPS  | TEIPSWPKQRDYIAAIAANIKKGLATFHG-----EKTEI     | 189 |
| sp | Q747F5 | HEMH_GEOSL  | MYVDRFFDHPYIIDLAEKIREGLDDFHPL-----AEVQV     | 187 |
| sp | Q9ZKD4 | HEMH_HELPLJ | RVIERFYASKKLNELIILNTILSALNNCKSQD-----FVL    | 202 |
| sp | P56107 | HEMH_HELPY  | RVIERFYASKKLNELIILNTILNLRKNSQD-----FVL      | 202 |
| sp | Q7M7P9 | HEMH_WOLSU  | KEIDRYFEDSNYNEAIIIDRILEALGGDNPEE-----FTL    | 183 |
| sp | Q7VHH1 | HEMH_HELHP  | YEISSYHTHPDYISCIIERIKESLGADNPNE-----FVL     | 174 |
| sp | Q9PI08 | HEMH_CAMJE  | KTIDIFYKNELYNEMIVSHILAKKSKFPAK-----IL       | 180 |
| sp | Q8DFM2 | HEMH_VIBVU  | QFIRDYHDHPYIKALAESVRQSWQVQGK-----GDYL       | 189 |
| sp | Q7MMR4 | HEMH_VIBVY  | QFIRDYHDHPYIKALAESVRQSWQAQGK-----GDYL       | 189 |
| sp | Q9KTB6 | HEMH_VIBCH  | HFIRDYHDHPYIQAALAKSVRASWQQHGQ-----GDLL      | 189 |
| sp | Q87RH3 | HEMH_VIBPA  | SFIRDYHDHPYIEALAHSVRQYWEHGK-----GDYL        | 189 |
| sp | Q6LTE0 | HEMH_PHOPR  | RFINHYFDHPDYIDALALSVTDFWAENGE-----PDYL      | 188 |
| sp | Q8EFF4 | HEMH1_SHEON | RFNKQYFAHEAYIAALAHSVKRHWKTHGQ-----AEKL      | 210 |
| sp | Q8XD39 | HEMH_ECO57  | SFIRDYADNHDYINALANSVRASFAGHGE-----PDL       | 189 |
| sp | P23871 | HEMH_ECOLI  | SFIRDYADNHDYINALANSVRASFAGHGE-----PDL       | 189 |
| sp | Q8FK83 | HEMH_ECOL6  | SFIRDYADNHDYINALANSVRASFAGHGE-----PDL       | 189 |
| sp | Q83SE5 | HEMH_SHIFL  | SFIRDYADNHDYINALANSVRASFAGHGE-----PDL       | 189 |
| sp | Q8Z8T2 | HEMH_SALTI  | SFIRDYADDGAYIDALAKSARESFARHGE-----PDL       | 189 |
| sp | P37408 | HEMH_SALTY  | SFIRDYADDGAYIDALAKSARESFARHGE-----PDVL      | 189 |
| sp | Q8ZC98 | HEMH_YERPE  | SFIRDYAEHPAYISALKQSVERSFAEHGQ-----PDL       | 189 |
| sp | Q05338 | HEMH_YERPS  | SFIRDYAEHPAYISALKQSVERSFAEHGQ-----PDL       | 189 |
| sp | P43413 | HEMH_YEREN  | SFIRDYAEHPAYISALKQSVENSFVQHKG-----PDL       | 189 |
| sp | Q6D7Z4 | HEMH_ERWCT  | RFIRDYAEHPAYIAALKHRVEQSFAGHGE-----PDL       | 189 |
| sp | Q7N0P6 | HEMH_PHOLL  | HFIRSYADHPAYIAALKHRTIEQSFDKHGQ-----PDL      | 189 |
| sp | P43868 | HEMH_HAEIN  | DFIHSYHIDENYINALADSIKVRKLS-----EFL          | 191 |
| sp | P57874 | HEMH_PASMU  | DFIHSYHTNEDYIAALVTTIQEHFQPD-----EFL         | 190 |
| sp | Q65SV7 | HEMH_MANSM  | EFIHSYHLDENYIEALVKSIVKRLKND-----EFL         | 190 |
| sp | Q8CWW4 | HEMH_STRMU  | DFIHHYERPSYIQALAQTI--HLQEN-----EHL          | 188 |
| sp | Q8D226 | HEMH_WIGBR  | IFIRDYADNINYNAINITNSIKKSFNKNGI-----PEML     | 189 |
| sp | Q8EBZ7 | HEMH2_SHEON | HFINTYHDNPDYIINALVNSIRDDDFDKHGK-----PQKL    | 196 |
| sp | Q6F7N0 | HEMH_ACIAD  | TIIDKYRHPVFIQALVSSVQRFOQQHGK-----PQKL       | 197 |
| sp | Q7WGI0 | HEMH_BORBR  | RFVKRFHNDPAYVEAQAGRIAEFWQAHGR-----PQKL      | 223 |
| sp | Q7W515 | HEMH_BORPA  | RFVKRFHNDPAYVEAQAGRIAEFWQAHGR-----PQKL      | 223 |
| sp | Q7VVX8 | HEMH_BORPE  | RFVKRFHNDPAYVEAQAGRIAEFWQAHGR-----PQKL      | 223 |
| sp | Q62HD1 | HEMH_BURMA  | RTVRYADHPAYIHALAEQVRQYWAHGRPA-----FDAGDKL   | 221 |
| sp | Q63R43 | HEMH_BURPS  | RTVRYADHPAYIHALAEQVRQYWAHGRPA-----FDAGDKL   | 221 |
| sp | Q8XW32 | HEMH_RALSO  | RLVKHFHDHPAYINALHQVQAYWAQHAGPD-----FARGDKL  | 213 |
| sp | Q7NV65 | HEMH_CHRVO  | RTVRHFHDDPGYIAALAAQIRKHWQYGGQR-----PDKL     | 208 |
| sp | Q82UK8 | HEMH_NITEU  | RTVRHYHDDPGYIAALQNVRDYWEKHGQ-----PDKL       | 206 |
| sp | Q9JVA5 | HEMH_NEIMA  | RTVSRFYDDTGYIDAMKNHILRYWAEHGR-----GKKL      | 201 |
| sp | Q9K097 | HEMH_NEIMB  | RTVSRFYDDTGYIDAMKNHILRYWAEHGR-----GKKL      | 201 |
| sp | Q8PEX0 | HEMH_XANAC  | EVIQDYCEDTGWVAIAIESIRAHWQVHGR-----SEKL      | 189 |
| sp | Q8P3H6 | HEMH_XANCP  | EVIQDYCEDAGWVAIAIADSIRTHWQVHGR-----SEKL     | 189 |
| sp | Q9PFU1 | HEMH_XYLFA  | ECIQDYAEDSAWVAVAASIRRHWAHGR-----SEKL        | 189 |
| sp | Q87B82 | HEMH_XYLFT  | ECIQDYAEDPAWVAVAASIRRHWAHGR-----SEKL        | 189 |
| sp | Q607T4 | HEMH_METCA  | HFIGDYHRSPKYLEAVAASIRSFWEHGR-----PERL       | 190 |
| sp | Q8U9F7 | HEMH_AGR5   | RTVPPYHDDPAYIEGLAASVKNHLATLDWE-----PEML     | 209 |
| sp | Q92M52 | HEMH_RHIME  | RTVPPYHDDPVYIDALATSINKHLATLDWE-----PELV     | 204 |

|    |        |             |                                                     |     |
|----|--------|-------------|-----------------------------------------------------|-----|
| sp | Q93TG2 | HEMH_BRUME  | RTVPSYEAEPVYIDALARSVEKHLATLSFK-----PEVI             | 217 |
| sp | Q98H61 | HEMH_RHILO  | RSVPPYYAEPVYIEALASSIERHLATLDLFE-----PEVV            | 218 |
| sp | P28602 | HEMH_BRAJA  | RVTTPPYEDEAYIEALAVSIETHLATLPFK-----PELI             | 210 |
| sp | Q6NBF3 | HEMH_RHOPA  | RVTTPPYRDSAYIDALATSIKSHLASLTFE-----PELI             | 210 |
| sp | Q59735 | HEMH_RHOCA  | RTVPEYFARPSYIEALASSVERVYATLDTR-----PDVL             | 215 |
| sp | P57779 | HEMH_ZYMMO  | RSLEPYYPHAYIQTLLKNIEDQIKALDFK-----PDSL              | 198 |
| sp | Q833G5 | HEMH_ENTFA  | KFIRSFYNNPQYIDYFSKINEALNESP-----IDAI                | 186 |
| sp | Q9CFB4 | HEMH_LACLA  | KVIRDFHKVESYSDLLAESIREKWQAND-----YDKL               | 181 |
| sp | Q67T48 | HEMH_SYMTH  | IFIRDFPHTPKYLAFLTERISGYIAEKGR-----PDAL              | 189 |
| sp | Q88XC3 | HEMH_LACPL  | TFIDSFYDQPTYIHLLATKVWQSYQAHHY-----DAV               | 179 |
| sp | P57778 | HEMH_PSEFL  | SILQPFYDQPEYLDLAVASARPHLQOD-----YDHL                | 184 |
| sp | Q888A2 | HEMH_PSESM  | SVLQPFYDQPEYVSALVESVRPHLEQP-----YDHL                | 184 |
| sp | Q88PV4 | HEMH_PSEPK  | RVLQPFYEHAYIEALASARPYLEQG-----YDHL                  | 184 |
| sp | Q9HVD7 | HEMH_PSEAE  | STLPPFYDQPVYLDALVESVRPYLQQP-----HDHL                | 184 |
| sp | Q6MHT3 | HEMH_BDEBA  | RRLPAFFDDASVFGTSSVKLVEETLQDKE-----VDHY              | 187 |
| sp | Q83FA4 | HEMH_COXBU  | TVIDRFFEEPHYIDSMTTLIHENLNEFQ-----PDYF               | 188 |
| sp | Q6MAW8 | HEMH_PARUW  | TFINSYDPHPLVGFACERAKQYDLSI-----YDYF                 | 187 |
| sp | Q7MXP4 | HEMH_PORGI  | RVVQPFYAHAYIRVLDNIRPYLTKP-----FDKL                  | 194 |
| sp | Q824K8 | HEMH_CHLCV  | -WVSHFGNHPEFISCMMDHILKFLQSHD-----ISTHDCL            | 181 |
| sp | Q9Z7V1 | HEMH_CHLPN  | -WIPQFGSDSKFVSLITCHIRDFLQKLG-----ILEKECCF           | 182 |
| sp | Q9PJQ6 | HEMH_CHLMU  | -WITHFGVHPQFISCMREHIQDCLIAQG-----IVAEDCFF           | 179 |
| sp | O84492 | HEMH_CHLTR  | -WITQFVGHPEFVSCMQQHIRDCLAAQQ-----IAVEDCYF           | 179 |
| sp | Q8GCV0 | HEMH_LEPBI  | GYVPHFGLDPNFHISISAKFIYEFFTNQLPKDQYLHYPEEKPNCDWRNLDL | 207 |
| sp | Q81U22 | HEMH1_BACAN | HGIDSWYKEPKFIQYVWDAVKSIYSGMSDAER-----EKAVL          | 177 |
| sp | Q6HM97 | HEMH1_BACHK | HGIDSWYKEPKFIQYVWDAVKGIYSGMSDAER-----EKAVL          | 177 |
| sp | Q63ES4 | HEMH1_BACCZ | HGIDSWYKEPKFIQYVWDAVKGIYNGMSDAER-----EKAVL          | 177 |
| sp | Q73C98 | HEMH1_BACC1 | HGIDSWYKEPKFIQYVWDAVKGIYNGMSDAER-----EKAVL          | 177 |
| sp | Q81GW5 | HEMH1_BACCR | HGIDSWYKEPKFIQYVWDAVKGIYNGMSDAER-----EKAVL          | 177 |
| sp | P32396 | HEMH_BACSU  | TSVESWYDEPKFVTVYVWDRVKETYASMPEDER-----ENAML         | 178 |
| sp | Q8ERX9 | HEMH_OCEIH  | DSVEDWYTEPGFIKFWADGIKATYAEMTEEER-----NNSVL          | 177 |
| sp | Q71XF4 | HEMH_LISMF  | KAINDWYKQPKFIQMWADRINETAKQIPADEL-----LDTVL          | 177 |
| sp | Q8Y565 | HEMH_LISMO  | NAINDWYKQPKFIQMWADRINETAKQIPADEL-----LDTVL          | 177 |
| sp | Q929G2 | HEMH_LISIN  | QAINDWYKQPKFIQMWADRINETAKQIPAEEL-----IDTVL          | 177 |
| sp | P64124 | HEMH_STAAM  | THVKHYEQPKFIEYWTNKVNETLAQIPEEEH-----KDTVL           | 176 |
| sp | P64125 | HEMH_STAAN  | THVKHYEQPKFIEYWTNKVNETLAQIPEEEH-----KDTVL           | 176 |
| sp | Q6G8A3 | HEMH_STAAS  | THVKHYEQPKFIEYWTNKVNETLAQIPEEEH-----KDTVL           | 176 |
| sp | P64126 | HEMH_STAAW  | THVKHYEQPKFIEYWTNKVNETLAQIPEEEH-----KDTVL           | 176 |
| sp | Q6GFM4 | HEMH_STAAR  | THVKHYEQPKFIEYWTNKVNETLAQIPEEEH-----KDTVL           | 176 |
| sp | Q8CNS1 | HEMH_STAEP  | THIKHYEQPKFIKYWTEKINETLEQIPNQEHE-----DETVL          | 176 |
| sp | Q81TU9 | HEMH2_BACAN | KPIDQWYDEPKFISYWADQIKETFTKIEDKE-----KAVV            | 176 |
| sp | Q6HM28 | HEMH2_BACHK | EPIDQWYDEPKFISYWADQIKETFTKIEDNE-----KAVV            | 176 |
| sp | Q63EK7 | HEMH2_BACCZ | EPIDQWYDEPKFISYWADQIKETFTKIEDKE-----KAVV            | 176 |
| sp | Q73C08 | HEMH2_BACC1 | EPIEQWYDEPKFISYWADQIKETFTKIEDKE-----KAVV            | 176 |
| sp | Q81GN7 | HEMH2_BACCR | ESIEQWYDEPKFISYWADQIKETFTTEIDDKE-----KAVV           | 176 |
| sp | Q9KDK9 | HEMH_BACHD  | QSVESWYDEPLFIQYVWVNDTMAKIEDKD-----KACV              | 176 |
| sp | Q5WHT1 | HEMH_BACSK  | YTIESWYKEPGFLQFWKEQIENEMKKADSID-----DLCV            | 176 |
| sp | Q72L32 | HEMH_THET2  | VWVESYEAHPGLIAAYARRLEEVIWRLKNPG-----KAAY            | 186 |
| sp | Q9RV98 | HEMH_DEIRA  | AYIDNYHTPEGYITALADRVRIGIQEFPEDER-----DDVHV          | 181 |
| sp | Q97R30 | HEMH_STRPN  | LVIKDWYQEEALLNYWADEIAKILKEEVKQD-----SFKV            | 164 |
| sp | Q8DQ04 | HEMH_STRR6  | LVIKDWYQEEALLNYWADEIAKILKEEVKQD-----SFKV            | 164 |
| sp | Q8FTB1 | HEMH_COREF  | TKLRQFYDHPFRVTRTMAQYVRESFDKL-----P-----EDLRDEARL    | 189 |
| sp | Q8NQA1 | HEMH_CORGL  | TKLRQFYDHPFRVSTMAQLVQDSYAKL-----P-----DELDRDEARL    | 184 |
| sp | Q6NH66 | HEMH_CORDI  | LKLRQFFDHPFLFIEEMSSVVFQAARELGISA-L-----DELQLHQKV    | 192 |
| sp | Q740Y1 | HEMH_MYCPA  | VKLRPYFDHPFLFVEMFAGAIADAAAKVPA-----GARL             | 167 |
| sp | P71765 | HEMH_MYCTU  | VKLRPYFDHPFLFVEMFADAITAAAATVRG-----DARL             | 167 |
| sp | Q9CBM2 | HEMH_MYCLE  | VKLRPYFDHPFLFVEMFVDAITAAAASLPAA-----LRSEARL         | 171 |
| sp | Q5YU18 | HEMH_NOCPA  | TKLRQFYFDHPFLFIEAFADAIRAALERLPAD-----RRDRARL        | 176 |
| sp | O07401 | HEMH_MYCAV  | GQAAAVFRPSAVRGDVRRRDADAAAKVPAG-----ARL              | 166 |
| sp | Q83H94 | HEMH_TROW8  | DKLRQFFDHPGFVLPFIEGIQDCLEQVKERG-----FKVSRTAI        | 206 |
| sp | Q83FJ2 | HEMH_TROWT  | DKLRQFFDHPGFVLPFIEGIQDCLEQVKERG-----FKVSRTAI        | 206 |
| sp | Q6AHF2 | HEMH_LEIXX  | DKVRQFFDHPGFVEPFIEGVKNAVEELRERAPE-----IHPATGURI     | 200 |
| sp | Q82KJ6 | HEMH_STRAW  | DKLRHYFNHPGFVEPMTGEVLRSLAELP-----EDVRPGAHI          | 186 |
| sp | O50533 | HEMH_STRCO  | DKLRHYFNHPGFVEPMVDGVRSLAELP-----AEVRDGAHI           | 186 |



|    |        |            |                                            |     |
|----|--------|------------|--------------------------------------------|-----|
| sp | Q7UFZ7 | HEMH_RHOBA | EKVRMGFNHPGFIAAMADNVSKAAQTIG-----ASPAR-TKV | 179 |
| sp | P72183 | HEMH_PROFR | VKLDPYADLPALVTAQVQLLRAALADHP-----DAHL      | 173 |
| sp | Q9HLB8 | HEMH_THEAC | EFVNGLANSDLFLPMWANIISEDASEDS-----FY        | 162 |
| sp | Q978U9 | HEMH_THEVO | EFVNGISNYDLFIPMWHLIEEKEKGDS-----FY         | 164 |

|    |        |             |                                   |     |
|----|--------|-------------|-----------------------------------|-----|
| sp | P42043 | HEMH1_ARATH | FFSAHGVPVSYVENAG-----DPYQKQMEECI  | 306 |
| sp | P42044 | HEMH_CUCSA  | FFSAHGVPVSYVENAG-----DPYKQDMEECI  | 331 |
| sp | P42045 | HEMH_HORVU  | FFSAHGVPPLTYVKDAG-----DPYRDQMEDCI | 325 |
| sp | O04921 | HEMH2_ARATH | FFSAHGVPVSYVENAG-----DPYKAEEMEECV | 317 |
| sp | O22101 | HEMH_ORYSA  | FFSAHGVPVSYVENAG-----DPYKAEEMEECV | 298 |
| sp | Q8YQR8 | HEMH_ANASP  | FFSAHGVPKSYVEEAG-----DPYQOEIEECT  | 218 |
| sp | P54225 | HEMH_SYNY3  | FFSAHGVPQSYVDEAG-----DPYQAEIEACT  | 218 |
| sp | Q8DGU6 | HEMH_SYNEL  | FFSAHGVPKSYVTEAG-----DPYQEEIEACV  | 219 |
| sp | Q7VD58 | HEMH_PROMA  | CFTAHGVPKSYVEEAG-----DPYKDEIQDCA  | 218 |
| sp | Q7V2F5 | HEMH_PROMP  | FFTAHGVPKSYVEEAG-----DPYKEQIEDCS  | 218 |
| sp | Q7V6C6 | HEMH_PROMM  | FFSAHGVPKSYVEQAG-----DPYQKEIEACT  | 218 |
| sp | Q7U5G0 | HEMH_SYNPX  | FFSAHGVPKSYVEEAG-----DPYQQQIEACT  | 218 |
| sp | Q7NMC7 | HEMH_GLOVI  | LFSAHGVPRTYVDQDG-----DPYQRQTEETV  | 218 |
| sp | Q9ZC84 | HEMH_RICPR  | LFSAHGLPKRIIK-AG-----DPYSFQIKETV  | 209 |
| sp | Q68VM9 | HEMH_RICTY  | LFSAHGLPKRIIK-AG-----DPYSFQIKETV  | 209 |
| sp | Q92FV4 | HEMH_RICCN  | LFSAHGLPEKIIK-AG-----DPYSFQIKETV  | 209 |
| sp | Q73FY6 | HEMH_WOLPM  | LFSAHSLPLSIIK-KG-----DPYASQVERSV  | 214 |
| sp | P57777 | HEMH_CAUCR  | LFSAHGLPEKVIL-AG-----DPYQKQVEATA  | 214 |
| sp | O67083 | HEMH_AQUAE  | LFSAHSLPKKLIIE-EG-----DPYQEQTETV  | 206 |
| sp | P22830 | HEMH_HUMAN  | LFSAHSLPMSVVN-RG-----DPYPQEVSATV  | 284 |
| sp | P22315 | HEMH_MOUSE  | LFSAHSLPMSVVN-RG-----DPYPQEVGATV  | 281 |
| sp | P22600 | HEMH_BOVIN  | LFSAHSLPMSVVN-RG-----DPYPQEVGATV  | 277 |
| sp | O42479 | HEMH_CHICK  | LFSAHSLPMSVVN-RG-----DPYPQEVGATV  | 263 |
| sp | O57478 | HEMH_XENLA  | LFSAHSLPMSVVN-RG-----DPYPQEVGATV  | 271 |
| sp | Q9V9S8 | HEMH_DROME  | LFTAHSPLPKAVN-RG-----DAYPSEIGASV  | 244 |
| sp | O59786 | HEMH_SCHPO  | VFSAHSLPMSQVA-KG-----DPYVYIEAATS  | 249 |
| sp | P16622 | HEMH_YEAST  | LFSAHSLPMDVVN-TG-----DAYPAEVAATV  | 256 |
| sp | Q6APB0 | HEMH_DESPS  | VYSAHSLPTSFIIE-AG-----DPYVEHTKQSI | 215 |
| sp | Q747F5 | HEMH_GEOSL  | LFSAHSLPQSFID-EG-----DPYLDHIRETV  | 213 |
| sp | Q9ZKD4 | HEMH_HELPJ  | IFSVHGLPKSVID-AG-----DTYQQECEHHV  | 228 |
| sp | P56107 | HEMH_HELPY  | IFSVHGLPKSVID-AG-----DTYQQECEHHV  | 228 |
| sp | Q7M7P9 | HEMH_WOLSU  | IFSAHGLPQSVID-AG-----DPYKEVHANI   | 209 |
| sp | Q7VHH1 | HEMH_HELHP  | LLSAHSLPQSRID-EG-----DPYQKQCEENK  | 200 |
| sp | Q9PI08 | HEMH_CAMJE  | IFSAHSLPQSIID-KG-----DLYEKHVNDHV  | 206 |
| sp | Q8DFM2 | HEMH_VIBVU  | LCSYHGIPQRYADNG-----DVYPLHCEMTT   | 215 |
| sp | Q7MMR4 | HEMH_VIBVY  | LCSYHGIPQRYADNG-----DIYPLHCEMTT   | 215 |
| sp | Q9KTB6 | HEMH_VIBCH  | LCSYHGIPKRYAQN-----DIYPEHCLKTT    | 215 |
| sp | Q87RH3 | HEMH_VIBPA  | LCSYHGIPKRYADNG-----DIYPQHCEATT   | 215 |
| sp | Q6LTE0 | HEMH_PHOPR  | LCSYHGIPKRYADNG-----DDYPQRCHAT    | 214 |
| sp | Q8EFF4 | HEMH1_SHEON | ILSFHGIPLRATEG-----DPYPEQCRTTA    | 236 |
| sp | Q8XD39 | HEMH_ECO57  | LLSYHGIPQRYADEG-----DDYPQRCRTTT   | 215 |
| sp | P23871 | HEMH_ECOLI  | LLSYHGIPQRYADEG-----DDYPQRCRTTT   | 215 |
| sp | Q8FK83 | HEMH_ECOL6  | LLSYHGIPQRYADEG-----DDYPQRCRTTT   | 215 |
| sp | Q83SE5 | HEMH_SHIFL  | LLSYHGIPQRYADEG-----DDYPQRCRTTT   | 215 |
| sp | Q8Z8T2 | HEMH_SALTI  | LLSYHGIPQRYADEG-----DDYPQRCRDTT   | 215 |
| sp | P37408 | HEMH_SALTY  | LLSYHGIPQRYADEG-----DDYPQRCRDTT   | 215 |
| sp | Q8ZC98 | HEMH_YERPE  | VMSFHGIPKRYAQLG-----DDYPIRCEDTS   | 215 |
| sp | Q05338 | HEMH_YERPS  | VMSFHGIPKRYAQLG-----DDYPIRCEDTS   | 215 |
| sp | P43413 | HEMH_YEREN  | VLSFHGIPKRYAQLG-----DDYPQRCEDTS   | 215 |
| sp | Q6D7Z4 | HEMH_ERWCT  | VISYHGIPVRYANEG-----DDYPQRCRATT   | 215 |
| sp | Q7N0P6 | HEMH_PHOLL  | LLSYHGIPQRFVDTG-----DIYAEQCKLTT   | 215 |
| sp | P43868 | HEMH_HAEIN  | LFSYHGIPLRYEKMG-----DYYREHCKQTT   | 217 |
| sp | P57874 | HEMH_PASMU  | LFSFHGIPVRYENMG-----DYYREHCKQTV   | 216 |
| sp | Q65SV7 | HEMH_MANSM  | LFSFHGIPKRYEQEG-----DFYRPQCEQTA   | 216 |
| sp | Q8CWW4 | HEMH_STRMU  | LFSFHGIPQRYVIEG-----DYYTEHCQQTA   | 214 |
| sp | Q8D226 | HEMH_WIGBR  | IMSFHGIPKRYIKDG-----DDYLKRCNVTK   | 215 |
| sp | Q8EBZ7 | HEMH2_SHEON | VLSYHGMPERNLHLG-----DPYCFMCKTT    | 222 |

|    |        |             |                                                     |     |
|----|--------|-------------|-----------------------------------------------------|-----|
| sp | Q6F7N0 | HEMH_ACIAD  | LMSFHGIPQPYADKG-----DPYADRCRETA                     | 223 |
| sp | Q7WG10 | HEMH_BORBR  | VMSFHGLPRYSIELG-----DPYRDCLDTA                      | 249 |
| sp | Q7W515 | HEMH_BORPA  | VMSFHGLPRYSIELG-----DPYRDCLDTA                      | 249 |
| sp | Q7VVX8 | HEMH_BORPE  | VMSFHGLPRYSIELG-----DPYRDCLDTA                      | 249 |
| sp | Q62HD1 | HEMH_BURMA  | VLSFHGVPKRTLDLG-----DPYHDQCQQT                      | 247 |
| sp | Q63R43 | HEMH_BURPS  | VLSFHGVPKRTLDLG-----DPYHDQCQQT                      | 247 |
| sp | Q8XW32 | HEMH_RALSO  | LLSFHGVPRRTLELG-----DPYHCACLKTG                     | 239 |
| sp | Q7NV65 | HEMH_CHRVO  | VMSFHGVPRFTRDKG-----DPYHCECQKTG                     | 234 |
| sp | Q82UK8 | HEMH_NITEU  | IISFHGVPKRTLEMG-----DPYHCECQKTG                     | 232 |
| sp | Q9JVA5 | HEMH_NEIMA  | MLSFHGVPQKHYDLG-----DPYPDECRTA                      | 227 |
| sp | Q9K097 | HEMH_NEIMB  | MLSFHGVPQKHHDLG-----DPYPDECRTA                      | 227 |
| sp | Q8PEX0 | HEMH_XANAC  | MFSFHGLPQRVADAG-----DPYPQQCERSA                     | 215 |
| sp | Q8P3H6 | HEMH_XANCP  | MFSFHGLPQRVANAG-----DPYPQQCERSA                     | 215 |
| sp | Q9PFU1 | HEMH_XYLFA  | MFSFHGLPQRVANNG-----DPYPQRCQVSA                     | 215 |
| sp | Q87B82 | HEMH_XYLFT  | MFSFHGLPQRVANNG-----DPYPQRCQVSA                     | 215 |
| sp | Q607T4 | HEMH_METCA  | VFSFHGLPKCCIDRG-----DPYASQCQATA                     | 216 |
| sp | Q8U9F7 | HEMH_AGR5   | ITSFHGIPQSYFKKG-----DPYCHCQKTA                      | 235 |
| sp | Q92M52 | HEMH_RHIME  | LASFHGLPQKSYFEKG-----DPYQCQKTA                      | 230 |
| sp | Q93TG2 | HEMH_BRUME  | LTSYHGIPKSYSDKG-----DPYRQCLETT                      | 243 |
| sp | Q98H61 | HEMH_RHILO  | ITSYHGIPKPYSDKG-----DPYQAHCLETT                     | 244 |
| sp | P28602 | HEMH_BRAJA  | VASFHGMPPKSYVDKG-----DPYQEHCIATT                    | 236 |
| sp | Q6NBF3 | HEMH_RHOPA  | VASFHGMPPQAYIDKG-----DPYQAQCQVATV                   | 236 |
| sp | Q59735 | HEMH_RHOCA  | VASYHGMPPKRYHREG-----DPYHCQCQKTS                    | 241 |
| sp | P57779 | HEMH_ZYMMO  | LLSYHGMPVKTRELG-----DPYFQCQATS                      | 224 |
| sp | Q833G5 | HEMH_ENTFA  | VFSYHGIPMSYVKDG-----DNPYKECTKTT                     | 212 |
| sp | Q9CFB4 | HEMH_LACLA  | VLSYHGIPLSYVTKKK-----DAYEEQCKETT                    | 208 |
| sp | Q67T48 | HEMH_SYMTH  | VLSYHSIPQAYTASG-----DDYAAQCESTT                     | 215 |
| sp | Q88XC3 | HEMH_LACPL  | IFSYSIPTAMVRHG-----DPYQRECEATT                      | 205 |
| sp | P57778 | HEMH_PSEFL  | LFSFHGLPERHLNKLNPGHSLG--GSGDCCANASPEVRTTCYRGQCFVA   | 232 |
| sp | Q888A2 | HEMH_PSESM  | LLSFHGLPERHLHKRDPKTKHC--LKDDCCMTAPAQVVATCYRAQCQLQSA | 232 |
| sp | Q88PV4 | HEMH_PSEPK  | LLSFHGLPERHLKLFKPKGVKHDLRADCCGHGATAEVSSVCYRGQCLATA  | 234 |
| sp | Q9HVD7 | HEMH_PSEAE  | LLSFHGLPERHIRKLVKDPADH--LLAENSRNVSPALALCYRQCCLRTA   | 232 |
| sp | Q6MHT3 | HEMH_BDEBA  | LFSFHGLPESHVRKIP--GCLT---TEDCCFEKNACAKN-CYRAQCFATA  | 231 |
| sp | Q83FA4 | HEMH_COXBU  | LFSYHGLPERHLVKSQCQLAICN--RKNNCSPISSNEN-CYRAQCFETS   | 235 |
| sp | Q6MAW8 | HEMH_PARUW  | LFSFHGLPERQIRKGDSTGKCL---TENCCQVICSDNAFCYKAQCQYRTA  | 233 |
| sp | Q7MXP4 | HEMH_PORGI  | ILSYHGIPRDHLDKTTTRQALNLR--HPEGCCTEEDPTANVCYRYQTYRRT | 242 |
| sp | Q824K8 | HEMH_CHLCV  | LFSAHGLPMRHVNKG-----DPYNMQCEKSF                     | 207 |
| sp | Q927V1 | HEMH_CHLPN  | LFSVHGLPVRYISQG-----DPYKQCYESF                      | 208 |
| sp | Q9PJQ6 | HEMH_CHLMU  | LFSVHGLPMRHIRLG-----DPYAKQCQDSF                     | 205 |
| sp | O84492 | HEMH_CHLTR  | LFSVHGLPQRHIRLG-----DPYAKQCQASAF                    | 205 |
| sp | Q8GCV0 | HEMH_LEPBI  | VFSAHGVPMRLIHKG-----DRYMEEVELSV                     | 233 |
| sp | Q81U22 | HEMH1_BACAN | IVSAHSLPEKIIA-MGDP-----YPDQLNETA                    | 203 |
| sp | Q6HM97 | HEMH1_BACHK | IVSAHSLPEKIIA-MGDP-----YPDQLNETA                    | 203 |
| sp | Q63ES4 | HEMH1_BACCZ | IVSAHSLPEKIIA-MGDP-----YPDQLNETA                    | 203 |
| sp | Q73C98 | HEMH1_BACCL | IVSAHSLPEKIIA-MGDP-----YPEQLHETA                    | 203 |
| sp | Q81GW5 | HEMH1_BACCR | IVSAHSLPEKIIA-MGDP-----YPDQLNETA                    | 203 |
| sp | P32396 | HEMH_BACSU  | IVSAHSLPEKIKE-FGDP-----YPDQLHESA                    | 204 |
| sp | Q8ERX9 | HEMH_OCEIH  | IVSAHSLPEKILK-DGDP-----YKHQLEHTA                    | 203 |
| sp | Q71XF4 | HEMH_LISMF  | IVSAHSLPEKIKQ-HNDP-----YPDQLQETA                    | 203 |
| sp | Q8Y565 | HEMH_LISMO  | IVSAHSLPEKIKQ-HNDP-----YPNQLQETA                    | 203 |
| sp | Q929G2 | HEMH_LISIN  | IVSAHSLPEKIKQ-HNDP-----YPDQLQETA                    | 203 |
| sp | P64124 | HEMH_STAAM  | VVSAHSLPKGLIEKNNDP-----YPQLEHTA                     | 203 |
| sp | P64125 | HEMH_STAAN  | VVSAHSLPKGLIEKNNDP-----YPQLEHTA                     | 203 |
| sp | Q6G8A3 | HEMH_STAAS  | VVSAHSLPKGLIEKNNDP-----YPQLEHTA                     | 203 |
| sp | P64126 | HEMH_STAAN  | VVSAHSLPKGLIEKNNDP-----YPQLEHTA                     | 203 |
| sp | Q6GFM4 | HEMH_STAAR  | VVSAHSLPKGLIEKNNDP-----YPQLEHTA                     | 203 |
| sp | Q8CNS1 | HEMH_STAEP  | VVSAHSLPKGLIERNDP-----YPHELHETA                     | 203 |
| sp | Q81TU9 | HEMH2_BACAN | IVSAHSLPEKIIA-AGDP-----YVEQLQHTA                    | 202 |
| sp | Q6HM28 | HEMH2_BACHK | IVSAHSLPEKIIA-AGDP-----YVEQLQHTA                    | 202 |
| sp | Q63EK7 | HEMH2_BACCZ | IVSAHSLPEKIIA-AGDP-----YVEQLQHTA                    | 202 |
| sp | Q73C08 | HEMH2_BACCL | IVSAHSLPEKIIA-AGDP-----YVQQLQHTA                    | 202 |
| sp | Q81GN7 | HEMH2_BACCR | IVSAHSLPEKIIA-AGDP-----YVEQLKHTA                    | 202 |
| sp | Q9KDK9 | HEMH_BACHD  | IVSAHSLPEKIVD-YGDP-----YPQQLKHTA                    | 202 |

|    |        |            |                                                |     |
|----|--------|------------|------------------------------------------------|-----|
| sp | Q5WHT1 | HEMH_BACSK | IFSAHSLPEKIIQ-ANDP-----YPEQLRETA               | 202 |
| sp | Q72L32 | HEMH_THET2 | VFTAHSIPLSAVE-KGDP-----YPRQVEKTA               | 212 |
| sp | Q9RV98 | HEMH_DEIRA | ILSAHSLPVRIIK-EGDP-----YADQLHETA               | 207 |
| sp | Q97R30 | HEMH_STRPN | IFSAHSVPFALD-FGDP-----YIDQIFENS                | 190 |
| sp | Q8DQ04 | HEMH_STRR6 | IFSAHSVPFALD-FGDP-----YIDQIFENS                | 190 |
| sp | Q8FTB1 | HEMH_COREF | VFTAHSIPLNSKDADGNPIDG-----SIYSRQVEESS          | 221 |
| sp | Q8NQA1 | HEMH_CORGL | VFTAHSIPLTADNAAGTPEDG-----SLYSTQVKEAS          | 216 |
| sp | Q6NH66 | HEMH_CORDI | VFTAHSIPEVANENSGRKEG-----PLYSRQVYEA            | 224 |
| sp | Q740Y1 | HEMH_MYCPA | VFTAHSVPAADERLGP-----RLYSRQVAYAA               | 195 |
| sp | P71765 | HEMH_MYCTU | VFTAHSIPTAADRRCGP-----NLYSRQVAYAT              | 195 |
| sp | Q9CBM2 | HEMH_MYCLE | VFTAHSVPVATDRRCGP-----ALYSRQVYAA               | 199 |
| sp | Q5YU18 | HEMH_NOCFA | VFTAHSVPAADAAAGPPADGG-----ELYSRQVADAA          | 209 |
| sp | O07401 | HEMH_MYCAV | VFTAHSVPAADERLGP-----RLYSRQVAYAA               | 194 |
| sp | Q83H94 | HEMH_TROW8 | LFSTHSIPELDAAFSGPED-----AHFGKYGAYVSQHKAVV      | 242 |
| sp | Q83FJ2 | HEMH_TROWT | LFSTHSIPELDAAFSGPED-----AHFGKYGAYVSQHKAVV      | 242 |
| sp | Q6AHF2 | HEMH_LEIXX | LFSTHSIPSTDAGKSGPSGRPDS-----GEPWEGEGAYAAQHLAVA | 241 |
| sp | Q82KJ6 | HEMH_STRAW | AFTTHSIPTAAADTSGPVE-----EHGDGGAYVQKHLDA        | 221 |
| sp | O50533 | HEMH_STRCO | AFCTHSIPTSAADTSGPVE-----EHGDGGAYVQKHLDA        | 221 |
| sp | Q7UFZ7 | HEMH_RHOBA | LFTAHSIPMGADN-----CDYEKQLRESC                  | 204 |
| sp | P72183 | HEMH_PROFR | VFTTHSIPTAMAETSGPHG-----NAYIPQHLALI            | 203 |
| sp | Q9HLB8 | HEMH_THEAC | LFDAHSLPAPDREED-----YLFWLRYST                  | 186 |
| sp | Q978U9 | HEMH_THEVO | LFDAHSLPHPENEE-----YLFWLRYST                   | 188 |

\*. : \*

\*

|    |        |             |                                                      |     |
|----|--------|-------------|------------------------------------------------------|-----|
| sp | P42043 | HEMH1_ARATH | DLIMEELKAR-G---VLNDHKLAYQSRVGPVQWLKPYTDEVLVDLGKSG-   | 351 |
| sp | P42044 | HEMH_CUCSA  | CLIMQELKAR-G---IGNEHTLAYQSRVGPVQWLKPYTDEVLVELGQKG-   | 376 |
| sp | P42045 | HEMH_HORVU  | ALIMEELKSR-G---TLNDHTLAYQSRVGPVQWLKPYTDEVLVELGQKG-   | 370 |
| sp | O04921 | HEMH2_ARATH | DLIMEELDKR-K---ITNAYTLAYQSRVGPVEWLKPYTEEAITELGKKG-   | 362 |
| sp | O22101 | HEMH_ORYSA  | DLIMEELEKR-G---ITNACTLAYQSRVGPVEWLRPYTDETIIELGQKG-   | 343 |
| sp | Q8YQR8 | HEMH_ANASP  | ALIMQTLNR-----PNPHTLAYQSRVGPVEWLQPYTEDALKELGAQG-     | 260 |
| sp | P54225 | HEMH_SYNY3  | RLIMRTLDR-----PNQYTLAYQSRVGPVEWLKPYTEBALQKLAGEG-     | 260 |
| sp | Q8DGU6 | HEMH_SYNEL  | RLIIMAALNR-----PNAHVLAYQSRVGPVEWLQPYTEDVILELAAQG-    | 261 |
| sp | Q7VD58 | HEMH_PROMA  | LLIIDKVEKSLG---FNSNYTSLYQSRVGPEEWLKPYTEEVLEELGANG-   | 264 |
| sp | Q7V2F5 | HEMH_PROMP  | LLIIDELEKYLK---HTNPYTLAYQSRVGPVEWLKPYTEEVLTDLGKAK-   | 264 |
| sp | Q7V6C6 | HEMH_PROMM  | TLIMAELENLLG---YGNPHSLAYQSRVGPPEEWIQQPYTDQVIEQLGEAG- | 264 |
| sp | Q7U5G0 | HEMH_SYNPX  | DLIMKSLAEHMG---HSPNHTLAYQSRVGPVEWLKPYTEEALEQLGEAK-   | 264 |
| sp | Q7NMC7 | HEMH_GLOVI  | DLVMQSLGR-----PNAHSLAYQSRVGPVEWLKPYTEDTINELAQKG-     | 260 |
| sp | Q9ZC84 | HEMH_RICPR  | NKIVKELNKR-----DLDYKITYQSRVGPVEWLKPNTEDEIE-LAGKL-    | 251 |
| sp | Q68VM9 | HEMH_RICTY  | NKIVKELNIK-----DLDYKITYQSRVGPVEWLKPNTEDEIE-LAGKL-    | 251 |
| sp | Q92FV4 | HEMH_RICCN  | QAIVKELNIK-----DLDYKITYQSRVGPVEWLKPNTEDEIE-LAGKL-    | 251 |
| sp | Q73FY6 | HEMH_WOLPM  | ELIVEKLAIN-----NLDWSICYQSKIGPVKWLPESTSESELL-RAKAD-   | 256 |
| sp | P57777 | HEMH_CAUCR  | AAVAHLPP-----QIEWTVCYQSRVGPLKWIGPSTDEIR-RAGE-        | 255 |
| sp | O67083 | HEMH_AQUAE  | KLIMENFPE-----VEYTLAYQSKVGFQKWLPESTDEVIRNLIKKE-      | 247 |
| sp | P22830 | HEMH_HUMAN  | QKVMERLEYCN-----PYRLVWQSKVGPMPWLGQPTDESIKGLCERG-     | 326 |
| sp | P22315 | HEMH_MOUSE  | HKVMKELGYPN-----PYRLVWQSKVGPMPWLGQPTDEAIKGLCERG-     | 323 |
| sp | P22600 | HEMH_BOVIN  | QRVMDKLGYSN-----PYRLVWQSKVGPMPWLGQPTDEAIKGLCKRG-     | 319 |
| sp | O42479 | HEMH_CHICK  | QRVMEKLNHSN-----PYRLVWQSKVGPMPWLVQPTDETIKGLCQRG-     | 305 |
| sp | O57478 | HEMH_XENLA  | QKVMERLGFNSN-----PYRLVWQSKVGPMAWLGPQPTDESIKGLCQRG-   | 313 |
| sp | Q9V9S8 | HEMH_DROME  | HMVMQELGQTN-----PYSLAWQSKVGPLPWLAPATDDAIKGYVQKG-     | 286 |
| sp | O59786 | HEMH_SCHPO  | QAVMKRLNYKN-----KFVNAWQSKVGPLPVMSPATDFVIEQLGNRG-     | 291 |
| sp | P16622 | HEMH_YEAST  | YNIMQKLFKN-----PYRLVWQSQVGPMPWLGQPTDEIAEFLGPK--      | 297 |
| sp | Q6APB0 | HEMH_DESPS  | G-AIEEITGK-----RGRLCFQSKSGPVEWLEPSTPDVLIQLAQEG-      | 255 |
| sp | Q747F5 | HEMH_GEOSL  | RLVMERFEGV-----THHLAFQSRAGPVKWLPESTDEMLEHLAAHQ-      | 254 |
| sp | Q9ZKD4 | HEMH_HELPI  | SLLKELMQQKNI---PFKEVLLSYQSKLGPMPKWLPESTEEELIE---KHR- | 271 |
| sp | P56107 | HEMH_HELPY  | SLLKELMQQKNT---PFKEVLLSYQSKLGPMPKWLPESTEEELIE---KHR- | 271 |
| sp | Q7M7P9 | HEMH_WOLSU  | QALTKLLEERGI---TFKKITHAYQSKVGPMPKWLPESTLDEVLK---LHA- | 252 |
| sp | Q7VHH1 | HEMH_HELHP  | EVIQKALESEGI---VFKKIALAYQSKVGRMKWIGPSTKETIT---KYK-   | 243 |
| sp | Q9PI08 | HEMH_CAMJE  | EILKEKLDH-----FDEFILAYQSKLGPVVKWLEPNTSDVLA---NLN-    | 246 |
| sp | Q8DFM2 | HEMH_VIBVU  | E-LLRLELGL-----DKSQIGTTYQSRFGREEWLQPYTDKTLLESLPAKG-  | 258 |
| sp | Q7MMR4 | HEMH_VIBVY  | E-LLRLELGL-----DKSQIGTTYQSRFGREEWLQPYTDKTLLESLPAKG-  | 258 |
| sp | Q9KTB6 | HEMH_VIBCH  | E-LLAQALGL-----PQDKVMTTYQSQFGKEEWLQPYTDKTMALPRQG-    | 258 |
| sp | Q87RH3 | HEMH_VIBPA  | R-LLGEALGL-----SSDQIGMAYQSRFGREEWLQPYTDKTLLETITSKG-  | 258 |
| sp | Q6LTE0 | HEMH_PHOPR  | E-KLAERLAM-----PREKMSMSYQSIFGREEWLQPYTEVTIEALAQKG-   | 257 |

|    |        |             |                                                      |     |
|----|--------|-------------|------------------------------------------------------|-----|
| sp | Q8EFF4 | HEMH1_SHEON | K-LLAQALGL-----TDGQWQVCFQSRFGKEEWLTPYADELLADLPRQG-   | 279 |
| sp | Q8XD39 | HEMH_ECO57  | R-ELASALGM-----APEKVMMTFQSRFGREPWLMPYTDDETLKMLGEKG-  | 258 |
| sp | P23871 | HEMH_ECOLI  | R-ELASALGM-----APEKVMMTFQSRFGREPWLMPYTDDETLKMLGEKG-  | 258 |
| sp | Q8FK83 | HEMH_ECOL6  | R-ELASALEM-----APEKVMMTFQSRFGREPWLMPYTDDETLKMLGEKG-  | 258 |
| sp | Q83SE5 | HEMH_SHIFL  | R-ELASALGM-----VPEKVMMTFQSRFGREPWLMPYTDDETLKMLGEKG-  | 258 |
| sp | Q8Z8T2 | HEMH_SALTI  | R-ELVSALGL-----PPEKVMMTFQSRFGREPWLTPYTDDETLKMLGEKG-  | 258 |
| sp | P37408 | HEMH_SALTY  | R-ELVSALGL-----PPEKVMMTFQSRFGREPWLTPYTDDETLKMLGEKG-  | 258 |
| sp | Q8ZC98 | HEMH_YERPE  | R-ALRAALPL-----PAEKIIMTYQSRFGREPWLTPYTDDETLKSLPSQG-  | 258 |
| sp | Q05338 | HEMH_YERPS  | R-ALRAALPL-----PAEKIIMTYQSRFGREPWLTPYTDDETLKSLPSQG-  | 258 |
| sp | P43413 | HEMH_YEREN  | R-ALRAEIAL-----PAEQIMMITYQSRFGREPWLTPYTDDETLKSLPSQG- | 258 |
| sp | Q6D7Z4 | HEMH_ERWCT  | E-ALIAALGL-----PEGKIMMITYQSRFGREPWLTPYTDDETMQGLPAQG- | 258 |
| sp | Q7N0P6 | HEMH_PHOLL  | R-LLKQALNY-----VPEKVMMTFQSRFGREPWLTPYVDQTMKTLNPGQ-   | 258 |
| sp | P43868 | HEMH_HAEIN  | I-AVVNKLGL-----TENQWRMTFQSRFGREEWLQPYTDKFLSAAAQN-    | 260 |
| sp | P57874 | HEMH_PASMU  | L-AVIDRLGL-----TENQWGLSFQSRFGKEEWLQPYTDQFLAQAPSON-   | 259 |
| sp | Q65SV7 | HEMH_MANSM  | Q-AVVQKLGL-----KKEQWRLCFQSRFGSEPWLQPYTDKFLSAAAQN-    | 259 |
| sp | Q8CWW4 | HEMH_STRMU  | Q-LIAVAAGL-----SEEQWQVSYQSRFGPEEWTRPYTDDETLIQLPKQG-  | 257 |
| sp | Q8D226 | HEMH_WIGBR  | K-LVLSKLNLF-----SRKKVIMSFQSKFGNIPWITPITSEVISFLPKKG-  | 258 |
| sp | Q8EBZ7 | HEMH2_SHEON | R-LVAEQLGL-----SKDEFAITFQSRFGKAKWLQPYTDATMQLPSQG-    | 265 |
| sp | Q6F7N0 | HEMH_ACIAAD | R-LVAKQLGL-----TPDDWAI SFQSRFGKQEWKPYTDDELLTTWAANG-  | 266 |
| sp | Q7WGI0 | HEMH_BORBR  | R-LLRERLGL-----REDEVEVTFQSRFGSARWLEPYTEPTLAELARQG-   | 292 |
| sp | Q7W515 | HEMH_BORPA  | R-LLRERLGL-----REDEVEVTFQSRFGSARWLEPYTEPTLAELARQG-   | 292 |
| sp | Q7VVX8 | HEMH_BORPE  | R-LLRERLGL-----REDEVEVTFQSRFGSARWLEPYTEPTLAELARQG-   | 292 |
| sp | Q62HD1 | HEMH_BURMA  | A-LLMSALGL-----TTFECRVTFQSRFGKAEWLQPYTAPTLLKELGAAG-  | 290 |
| sp | Q63R43 | HEMH_BURPS  | A-LLMSALGL-----TTFECRVTFQSRFGKAEWLQPYTAPTLLKELGAAG-  | 290 |
| sp | Q8XW32 | HEMH_RALSO  | R-LLGEALGL-----PQGQYLVTFQSRFGRAEWLQPYTAPTLEELGRVG-   | 282 |
| sp | Q7NV65 | HEMH_CHRVO  | R-LLAEALQL-----RPDQYVVSFQSRFGRTTEWLKPYTSEVLEALGKAK-  | 277 |
| sp | Q82UK8 | HEMH_NITEU  | R-LLAEALEL-----ADDRYQICFQSRFGFAQWLGPYTAELAEALGKQK-   | 275 |
| sp | Q9JVA5 | HEMH_NEIMA  | K-LLAEALEL-----TEDQYVVSFQSQFGRKAWVTPSTQDLFGKLPKQG-   | 270 |
| sp | Q9K097 | HEMH_NEIMB  | K-LLAEALEL-----TEDQYVVSFQSQFGRKAWVTPSTQDLFGKLPKQG-   | 270 |
| sp | Q8PEX0 | HEMH_XANAC  | Q-AIVALGL-----GADEWQMGYQSRFGAERWLQPYAEPTLWLKLAEGG-   | 258 |
| sp | Q8P3H6 | HEMH_XANCP  | Q-AIVALGL-----GPDAWQMGYQSRFGAERWLQPYAEPTLWALAEGG-    | 258 |
| sp | Q9PFU1 | HEMH_XYLFA  | S-LIAAALDL-----NESEWVLGYQSRFGAERWLQPYAEPTLWALAESG-   | 258 |
| sp | Q87B82 | HEMH_XYLFT  | S-LIAAALNL-----NESEWVLGYQSRFGAERWLQPYAEPTLWALAESG-   | 258 |
| sp | Q607T4 | HEMH_METCA  | Q-GIARLLEL-----SDDEWLLTYQSRFGRAEWLQPYCIDTLRELPSQG-   | 259 |
| sp | Q8U9F7 | HEMH_AGRT5  | R-LLREALGR-----TEKNFMITFQSRFGPEEWLQPYTDKTVKLASEG-    | 278 |
| sp | Q92M52 | HEMH_RHIME  | R-LLREKLGW-----PQDRLQVTFQSRFGPEEWLQPYTDATVERLAKEG-   | 273 |
| sp | Q93TG2 | HEMH_BRUME  | R-LLRERLGL-----GEDEMRAITFQSRFGPEEWLQPYTDDETVKELAKNG- | 286 |
| sp | Q98H61 | HEMH_RHILO  | R-LLREKLGW-----DEKLLITTFQSRFGAQEWLQPYTDKTVKELGKDG-   | 287 |
| sp | P28602 | HEMH_BRAJA  | E-ALRRRLGV-----DASKLLLTFQSRFGNDEWLQPYTDKTMERLAKEG-   | 279 |
| sp | Q6NBF3 | HEMH_RHOPA  | E-ALRRRMGV-----ADDKLLLTFQSRFGFDQWLQPYTDKTI EALARKG-  | 279 |
| sp | Q59735 | HEMH_RHOCA  | R-LLRERLGL-----GPDSIDTTFQSVFGTEEWLQPYTVEHVVLAEAG-    | 284 |
| sp | P57779 | HEMH_ZYMMO  | Q-ALSSLLDI-----P---VITSFQSRFGSQKWFPTPATDMLKELPSKN-   | 264 |
| sp | Q833G5 | HEMH_ENTFA  | K-LIMDKLG-----DIRYQTYQSKFGPSEWLKPATDDTLKKLPSKG-      | 253 |
| sp | Q9CFB4 | HEMH_LACLA  | R-LVVS KLGL-----REEEYHTYQSKFGPEKWLQPYTIDRVAELPKEN-   | 251 |
| sp | Q67T48 | HEMH_SYMTH  | D-AVRDRFP-----DLKIVMGYQSKFGNDPWLQPYTDVLELVRTG-       | 256 |
| sp | Q88XC3 | HEMH_LACPL  | KAVLAERPEL-----PADKVITAYQSKFGPMPWLKPYLKNELMQLVELG-   | 249 |
| sp | P57778 | HEMH_PSEFL  | R-DFAARMGL-----PDDKWSVAFQSRFGRAEWLQPYTETEARLEALAQQG- | 275 |
| sp | Q888A2 | HEMH_PSESM  | A-AFAKRMGI-----PDGKWSVAFQSRFGRAEWLQPYTETEARLEALAQQG- | 275 |
| sp | Q88PV4 | HEMH_PSEPK  | K-AFAQSMGI-----PDGKWSVAFQSRFGRAEWLQPYTETEARLEALAQQG- | 277 |
| sp | Q9HVD7 | HEMH_PSEAE  | E-AFAERAGL-----EQGRWSVAFQSRFGRAEWLQPYTETEARLEALAQQG- | 275 |
| sp | Q6MHT3 | HEMH_BDEBA  | T-AIAESLNL-----APSHWSVAFQSRFGRAEWLQPYTETEARLEALAQQG- | 274 |
| sp | Q83FA4 | HEMH_COXBU  | R-LIAKLNGL-----TDQYGVAFQSRFGRAEWLQPYTETEARLEALAQQG-  | 278 |
| sp | Q6MAW8 | HEMH_PARUW  | K-AIASKLRI-----KLEQYTVCFQSRFGKGTWIPYTSDDLKDKLAKN-    | 276 |
| sp | Q7MXP4 | HEMH_PORGI  | A-LIREALGL-----AEEQVEQVQSRFGHTTEWLQPYTETEARLEALAQQG- | 285 |
| sp | Q824K8 | HEMH_CHLCV  | R-AISERL-----PNLETHLCYQSKFGPGKWLSPSTKDLKATLTKTDK-    | 248 |
| sp | Q9Z7V1 | HEMH_CHLPN  | S-AITTNF-----KQSENFLCFQSKFGPGKWLSPSTKDLKATLTKTDK-    | 249 |
| sp | Q9PJQ6 | HEMH_CHLMU  | N-ALIG-----ESEGVL SFQSKFGIGEWLQPYTETEARLEALAQQG-     | 243 |
| sp | Q84492 | HEMH_CHLTR  | E-ALRG-----ELGKIAFQSKFGIGKWLDPSTQEVCSLRTKK-          | 243 |
| sp | Q8GCV0 | HEMH_LEPBI  | K-GIADELSKFG---FNGGVHISYQSKVGPAPKWTPESTIQMISSLAKQG-  | 278 |
| sp | Q81U22 | HEMH1_BACAN | DYIARGAEVAN-----YAVGW--QSAGNTPDPWIGPDVQDLTRELNEKYG   | 246 |
| sp | Q6HM97 | HEMH1_BACHK | DYIARGAEVAN-----YAVGW--QSAGNTPDPWIGPDVQDLTRELNEKYG   | 246 |
| sp | Q63ES4 | HEMH1_BACCZ | DYIARGAEVAN-----YAVGW--QSAGNTPDPWIGPDVQDLTRELNEKYG   | 246 |
| sp | Q73C98 | HEMH1_BACCI | DYIARGAEVAN-----YAVGW--QSAGNTPDPWIGPDVQDLTRELNEKYG   | 246 |

|    |        |             |                                                       |     |
|----|--------|-------------|-------------------------------------------------------|-----|
| sp | Q81GW5 | HEMH1_BACCR | DYIARGAEVAN-----YAVGW--QSAGNTPDPWIGPDVQDLTRELNEKHG    | 246 |
| sp | P32396 | HEMH_BACSU  | KLIAEGAGVSE-----YAVGW--QSEGNTDPWLGPDVQDLTRDLFEQKG     | 247 |
| sp | Q8ERX9 | HEMH_OCEIH  | KLIVEEADVKN-----YAVGW--QSEGNTDPWLGPDVQDLTRELYESEG     | 246 |
| sp | Q71XF4 | HEMH_LISMF  | DFIFEKVVVPH-----YALGW--QSEGKTGEPWLGPDVQDLTRELYGREK    | 246 |
| sp | Q8Y565 | HEMH_LISMO  | DFIFEKVVVPH-----YALGW--QSEGKTGEPWLGPDVQDLTRELYGREK    | 246 |
| sp | Q929G2 | HEMH_LISIN  | DLIFDKVAVPH-----YALGW--QSEGKTGEPWLGPDVQDLTRELYGREK    | 246 |
| sp | P64124 | HEMH_STAAM  | LLIIEQSNIEH-----IAIGW--QSEGNTGTPWLGPDVQDLTRDLYEKHQ    | 246 |
| sp | P64125 | HEMH_STAAN  | LLIIEQSNIEH-----IAIGW--QSEGNTGTPWLGPDVQDLTRDLYEKHQ    | 246 |
| sp | Q6G8A3 | HEMH_STAAS  | LLIIEQSNIEH-----IAIGW--QSEGNTGTPWLGPDVQDLTRDLYEKHQ    | 246 |
| sp | P64126 | HEMH_STAAW  | LLIIEQSNIEH-----IAIGW--QSEGNTGTPWLGPDVQDLTRDLYEKHQ    | 246 |
| sp | Q6GFM4 | HEMH_STAAR  | LLIIEQSNIEH-----IAIGW--QSEGNTGTPWLGPDVQDLTRDLYEKHQ    | 246 |
| sp | Q8CNS1 | HEMH_STAEP  | EILKQESNIIH-----VAEGW--QSEGNTGTPWLGPDVQDLTRDLYEKHQ    | 246 |
| sp | Q81TU9 | HEMH2_BACAN | DLIAAAANIQN-----YTIGW--QSAGNTPDPWIGPDVQDLTRDLFEFYR    | 245 |
| sp | Q6HM28 | HEMH2_BACHK | DLIAAAANIQN-----YTIGW--QSAGNTSDSWIGPDVQDLTRDLFEHR     | 245 |
| sp | Q63EK7 | HEMH2_BACCZ | DLIAAAANIQN-----YTIGW--QSAGNTSDPWIGPDVQDLTRELFEHR     | 245 |
| sp | Q73C08 | HEMH2_BACC1 | DLIAAAANIQN-----YTIGW--QSAGNTPDPWIGPDVQDLTRDLFEHR     | 245 |
| sp | Q81GN7 | HEMH2_BACCR | DLIAEAANIQN-----YTIGW--QSAGNTPDPWIGPDVQDLTKDLYEEHG    | 245 |
| sp | Q9KDK9 | HEMH_BACHD  | DLIAKAGAITN-----YAVGW--QSEGNTPEPWLGPDVQDLTRDLYETHG    | 245 |
| sp | Q5WHT1 | HEMH_BACSK  | DLIADMANVPN-----YAVGW--QSEGNTPEPWLGPDVQDLTRDLYETHG    | 245 |
| sp | Q72L32 | HEMH_THET2  | ELIAKKLALPR-----FHVAY--QSAGRTPEPWLGPDINELLRTLKEE-G    | 254 |
| sp | Q9RV98 | HEMH_DEIRA  | RLVAAQAGLTD-----EQWSWSYQSAGRSPEPWLGPDVQDLDEHLRDLNEQ-G | 251 |
| sp | Q97R30 | HEMH_STRPN  | KLVAEKLGLSS-----EQYNTWQSESDIGIPWIKPDVLEYLREQTEH--     | 233 |
| sp | Q8DQ04 | HEMH_STRR6  | KLVAEKLGLSS-----EQYNTWQSESDIGIPWIKPDVLEYLREQTEH--     | 233 |
| sp | Q8FTB1 | HEMH_COREF  | ALIAAREAGIDD-----FDVVW-QSRSGSPHPWLEPDIVDHAVELNENNG    | 265 |
| sp | Q8NQA1 | HEMH_CORGL  | ALIAEAVGVSD-----FDVVW-QSRSGSPHTPWLEPDIVDHAVELNEK-G    | 259 |
| sp | Q6NH66 | HEMH_CORDI  | SLVAKHLGISQE---RYDVVW-QSASGNGQIPWLEPDILDYAKCQHDE-G    | 269 |
| sp | Q740Y1 | HEMH_MYCPA  | RLVAAAAGYAE-----HDLVW-QSRSGPPQVRWLEPDVADHLRALAES-G    | 238 |
| sp | P71765 | HEMH_MYCTU  | RLVAAAAGYCD-----FDLAW-QSRSGPPQVPWLEPDVTDQTLGLAGA-G    | 238 |
| sp | Q9CBM2 | HEMH_MYCLE  | RLVAAAGYAD-----YDLTW-QSRSGPPYVPWLAPDVGDLMTLASA-G      | 242 |
| sp | Q5YU18 | HEMH_NOCAF  | RLCAAATGFAD-----HDLVW-QSRSGPPQVPWLEPDIVDHLEDLAGR-G    | 252 |
| sp | O07401 | HEMH_MYCAV  | RLVAAAAGYAE-----HDLVW-QSRSGPPQVRWLEPDVADHLRALAES-G    | 237 |
| sp | Q83H94 | HEMH_TROW8  | EVIMSRRLVTDPDQLQNYQLVY-QSRSGDPSTPWLEPDINDAIRVL--RG-   | 288 |
| sp | Q83FJ2 | HEMH_TROWT  | EVIMSRRLVTDPDQLQNYQLVY-QSRSGDPSTPWLEPDINDAIRVL--RG-   | 288 |
| sp | Q6AHF2 | HEMH_LEIXX  | EIVS--HEATGGTIG-WDLVY-QSRSGPPSMPWLEPDINDRIAELPELG-    | 286 |
| sp | Q82KJ6 | HEMH_STRAW  | RLIADAVREETGIDHPWQLVY-QSRSGAPHIPWLEPDICDHLQELHGAG-    | 269 |
| sp | O50533 | HEMH_STRCO  | RLIADAVREERTGVDHPWQLVY-QSRSGAPHIPWLEPDICDHLLEERQAAG-  | 269 |
| sp | Q7UFZ7 | HEMH_RHOBA  | RLVADACGAVD-----WDLVY-QSRSGPPSQPWLEPDVLDIAIEMDDAKK    | 248 |
| sp | P72183 | HEMH_PROFR  | DAVMAELAALG-LRPSWELAY-QSRSGSPRTPWLEPDINDVITRLAGEG-    | 250 |
| sp | Q9HLB8 | HEMH_THEAC  | YKISQILGLSR-----SDFGF-QGG----HLGWLGPSIYNVYRKAKEK--    | 224 |
| sp | Q978U9 | HEMH_THEVO  | YKITQIMGLRS-----SDFGF-QGG----HEGWLGPSIYNVYRKAKEK--    | 226 |

\*

|    |        |             |                                                     |     |
|----|--------|-------------|-----------------------------------------------------|-----|
| sp | P42043 | HEMH1_ARATH | VKSL LAVPVSFVSEHIETLEEIDMEYREL-ALESGVENWGRVPALGLTPS | 400 |
| sp | P42044 | HEMH_CUCSA  | IKSL LAVPVSFVSEHIETLEEIDMEYKHL-ALESGIQNWGRVPALNCNSS | 425 |
| sp | P42045 | HEMH_HORVU  | VKSL LAVPVSFVSEHIETLEEIDMEYREL-ALESGIENWGRVPALGCTSS | 419 |
| sp | O04921 | HEMH2_ARATH | VENLLAVPISFVSEHIETLEEIDVEYKEL-ALKSGIKNWGRVPALGTPEM  | 411 |
| sp | O22101 | HEMH_ORYSA  | VKSL LAVPISFVSEHIETLEEIDVEYKEL-ALESGIKHWGRVPALGCEPT | 392 |
| sp | Q8YQR8 | HEMH_ANASP  | VKDLVVVPISFVSEHIETLQEIDIEYREI-AEEAGIHNFRVPALNTHPV   | 309 |
| sp | P54225 | HEMH_SYNY3  | IDDLVVVPISFVSEHIETLQEIDIEYREI-AEEAGIDNFRVPALNTHPV   | 309 |
| sp | Q8DGU6 | HEMH_SYNEL  | VKTLVVVPISFVSEHIETLQEIDIEYREI-AEEAGIEVFRVPALNDHNG   | 310 |
| sp | Q7VD58 | HEMH_PROMA  | VKELIVVPISFVSEHIETLQEIDIEYKLI-ALNNGIINFRVKALDITYPL  | 313 |
| sp | Q7V2F5 | HEMH_PROMP  | VNDLIVVPISFVSEHIETLQEIDIEYKEI-AEKAGIVNFRVKALNTHPT   | 313 |
| sp | Q7V6C6 | HEMH_PROMM  | TRDLVVVPISFVSEHIETLAEIDIEYREL-ATEAGIVHFRVPALDITYPT  | 313 |
| sp | Q7U5G0 | HEMH_SYNPX  | TNDLVVVPISFVSEHIETLEEIDIEYREL-ATEAGVFNFRVRALDITYPP  | 313 |
| sp | Q7NMC7 | HEMH_GLOVI  | VRSL LAVPVSFISEHIETLQEIEIEYREV-AEAAGIHFRRAKALNVNKT  | 309 |
| sp | Q9ZC84 | HEMH_RICPR  | KKDIIIVPISFVSEHVETLVELDIEYKLI-ADKYKI-QYTRIPTLGTNKI  | 299 |
| sp | Q68VM9 | HEMH_RICTY  | KKDIIIVPISFVSEHVETLVELDIEYKFI-ADKYNI-QYTRIPTLGTNKI  | 299 |
| sp | Q92FV4 | HEMH_RICCN  | KKDIIIVPISFVSEHVETLVELDIEYKLI-ADKYEI-QYTRIPTLGTNKI  | 299 |
| sp | Q73FY6 | HEMH_WOLPM  | GVPVVLSPISFVSEHSETLVELDIEYKAI-IKDG---YFRVPTLSTDPL   | 302 |
| sp | P57777 | HEMH_CAUCR  | DKGVMITPIAFVSEHVETLVELDHEYAEI-AEEVGAAPYLRVSALGTAPE  | 304 |
| sp | O67083 | HEMH_AQUAE  | VKKLLVIPISFVSEHSETLYELDKQYREL-AQELGYEEFVRVPTLRNTPY  | 296 |
| sp | P22830 | HEMH_HUMAN  | RKNILLVPIAFTSDHIETLYELDIEYSQVLAKECGVENIRRAESLNGNPL  | 376 |
| sp | P22315 | HEMH_MOUSE  | RKNILLVPIAFTSDHIETLYELDIEYSQVLAQKCGAENIRRAESLNGNPL  | 373 |

|    |        |             |                                                      |     |
|----|--------|-------------|------------------------------------------------------|-----|
| sp | P22600 | HEMH_BOVIN  | RKNILLVPIAFTSDHIETLYELDIEYSQVLASECGLENIRRAESLNGNPL   | 369 |
| sp | Q42479 | HEMH_CHICK  | KKNMLLVPIAFTSDHIETLYELDIEYAQVLANECGVENIRRAESLNGNPL   | 355 |
| sp | O57478 | HEMH_XENLA  | KKNILLVPIAFTSDHIETLYELDIEYAQVLAKECGVENIRRSESLNGNPL   | 363 |
| sp | Q9V9S8 | HEMH_DROME  | LKNFILVPIAFVNEHIETLHIELDIEYCDLAKEVGVVEEIRRAATPNHDPL  | 336 |
| sp | O59786 | HEMH_SCHPO  | QKNMILVPIAFTSDHIETLTKEL--EDYIEDAKQKGITGVKRVSSINGSMT  | 339 |
| sp | P16622 | HEMH_YEAST  | VDGLMFIPIAFTSDHIETLHEIDLGVIGESEYK---DKFKRCESLNGNQT   | 344 |
| sp | Q6APP0 | HEMH_DESPS  | VKNILMVPISFVSDHVVETLYEIDILYKKQ-AKCLG-MRLTSCPSLNTQEQ  | 303 |
| sp | Q747F5 | HEMH_GEOSL  | VKNLLIVPLSFVSDHIETLHEIDIEYAQE-AHKLGYSRFRSPSLNTSPT    | 303 |
| sp | Q9ZKD4 | HEMH_HELPJ  | KSNI I IYPLAFTIDNSETLYELDMQYRLM-AERLAVKEYLVCPCLNDSIE | 320 |
| sp | P56107 | HEMH_HELPY  | KSHI I IYPLAFTIDNSETLYELDMQYRLM-AERLAVKEYLVCPCLNDSIE | 320 |
| sp | Q7M7P9 | HEMH_WOLSU  | KEKILLYPIAFTLDNSETDFELRIEYQEK-ATHLGITDYRVASCLNDSTR   | 301 |
| sp | Q7VHH1 | HEMH_HELHP  | KHKMIFPLSFTLDNSETYELKILYASL-AKELNVPQYRVSCFNDRNER     | 292 |
| sp | Q9PI08 | HEMH_CAMJE  | -DKALIYPIISFCIDCSETIFELGMEY-----KHLKYNVDLISCPNDSDE   | 290 |
| sp | Q8DFM2 | HEMH_VIBVU  | IKSLDVI TPAFVSDCLETLEEISEQQQES-FLHAGGEQYRFIPCLNDAPS  | 307 |
| sp | Q7MMR4 | HEMH_VIBVY  | IKSLDVI TPAFVSDCLETLEEISEQQQES-FLHAGGEQYRFIPCLNDAPS  | 307 |
| sp | Q9KTB6 | HEMH_VIBCH  | IKKLDVICPAFVSDCLETLEEIAEQNQEI-FLHSGGEAFHYVPCLNDSQS   | 307 |
| sp | Q87RH3 | HEMH_VIBPA  | VKKIDIMTPAFSSDCLETLEEIAGENKEI-FMEAGGEQFHYIPCLNDDDM   | 307 |
| sp | Q6LTE0 | HEMH_PHOPR  | IKRLDVMCPAFVSDCLETLEEIAEQCKET-FIKAGGDVFNLIIPCLNDNEA  | 306 |
| sp | Q8EFF4 | HEMH1_SHEON | VKSVDVICPAFATDCLETLEEISIGAKET-FLHAGGEAYHFIPCLNDEL    | 328 |
| sp | Q8XD39 | HEMH_ECO57  | VGHIQVMCPGFAADCLETLEEIAEQNREV-FLGAGGKKEYEYIPALNATPE  | 307 |
| sp | P23871 | HEMH_ECOLI  | VGHIQVMCPGFAADCLETLEEIAEQNREV-FLGAGGKKEYEYIPALNATPE  | 307 |
| sp | Q8FK83 | HEMH_ECOL6  | VGHIQVMCPGFAADCLETLEEIAEQNREV-FLGAGGKKEYEYIPALNATPE  | 307 |
| sp | Q83SE5 | HEMH_SHIFL  | VGHIQVMCPGFAADCLETLEEIAEQNREV-FLGAGGKKEYEYIPALNATPE  | 307 |
| sp | Q8Z8T2 | HEMH_SALTI  | TGHIQVMCPGFAADCLETLEEIAEQNREI-FLEAGGKKEYEYIPALNATPE  | 307 |
| sp | P37408 | HEMH_SALTY  | TGHIQVMCPGFAADCLETLEEIAEQNREI-FLEAGGKKEYEYIPALNATPE  | 307 |
| sp | Q8ZC98 | HEMH_YERPE  | VKHIQLICPGFSADLETLEEIKEQNREF-FLHAGGEKFEYIPALNDDEG    | 307 |
| sp | Q05338 | HEMH_YERPS  | VKHIQLICPGFSADLETLEEIKEQNREF-FLHAGGEKFEYIPALNDDEG    | 307 |
| sp | P43413 | HEMH_YEREN  | VKHIQLICPGFSADLETLEEIKEQNREF-FIHAGGEKFEYIPALNDDEG    | 307 |
| sp | Q6D7Z4 | HEMH_ERWCT  | IKHIQIMCPGFAADCLETLEEIQEQNREI-FLHAGGEAFHYIPALNDDDL   | 307 |
| sp | Q7N0P6 | HEMH_PHOLL  | IKHIQVLCPGFSSDCLETLEEIKQLNKEM-FLNAGGEKFEYIPALNDNAS   | 307 |
| sp | P43868 | HEMH_HAEIN  | IQKIAVICPGFVSDCLETLEEIDEENREN-FLNNGGQSYQYIPALNVEHA   | 309 |
| sp | P57874 | HEMH_PASMU  | IQKMAVICPGFAADCLETLEEIEEENKEI-FLANGGISYRYIPALNARPE   | 308 |
| sp | Q65SV7 | HEMH_MANSM  | ITKLAVICPGFSADLETLEEIKEENKRI-FLAYGGESYHYIPALNDSPE    | 308 |
| sp | Q8CWW4 | HEMH_STRMU  | KKKLAVICPGFAADCLETLEEIDITNRKH-FMAAGGQAYRYIPALNASPA   | 306 |
| sp | Q8D226 | HEMH_WIGBR  | IKNIQVICPGFSSDCLETLEEIKIQNKKI-FKDNGGKFFHYIPALNYSKI   | 307 |
| sp | Q8EBZ7 | HEMH2_SHEON | VRDVAIVCPAFSADLETLEEIVGENGHI-FTHAGGEKFRYIPALNDNDD    | 314 |
| sp | Q6F7N0 | HEMH_ACIAD  | IKSVQILSPAFAADLETLEELEIQNAEL-FLEAGGTSYQYIPALNTSVE    | 315 |
| sp | Q7WGI0 | HEMH_BORBR  | VTEVDVVC PGFVADLETLEEISQECRDA-FVAAGGRQFRYIPALNDCPP   | 341 |
| sp | Q7W515 | HEMH_BORPA  | VTEVDVVC PGFVADLETLEEISQECRDA-FVAAGGRQFRYIPALNDCPP   | 341 |
| sp | Q7VVX8 | HEMH_BORPE  | VTEVDVVC PGFVADLETLEEISQECRDA-FVAAGGRQFRYIPALNDCPP   | 341 |
| sp | Q62HD1 | HEMH_BURMA  | VRRADVFCPGFTADLETLEEIGIEVRDE-FVHGGGKEFHRIPCLNASPA    | 339 |
| sp | Q63R43 | HEMH_BURPS  | VRRADVFCPGFTADLETLEEIGIEVRDE-FVHGGGKEFHRIPCLNASPA    | 339 |
| sp | Q8XW32 | HEMH_RALSO  | TGRVDVFCPGFPADLETLEEIAMEGQST-FRVAGGKDFHYIPCLNDSEP    | 331 |
| sp | Q7NV65 | HEMH_CHRVO  | TARVDVVC PGFVGDLETLEEIAMEGKET-FLSHGGGEFHYIPCLNEDPQ   | 326 |
| sp | Q82UK8 | HEMH_NITEU  | TGRVDVVC PGFVSDCLETLEEIALEGKAI-FTEAGGGEFHYIPCLNDSH   | 324 |
| sp | Q9JVA5 | HEMH_NEIMA  | VTELDVFCPGFLADLETMEEIALMGREQ-FYEAGGKSRYRYIPCLNDNPD   | 319 |
| sp | Q9K097 | HEMH_NEIMB  | VTELDVFCPGFLADLETMEEIALMGREQ-FYEAGGKSRYRYIPCLNDNPD   | 319 |
| sp | Q8PEX0 | HEMH_XANAC  | VRSFDLVC PGFATDCLETLEEVALG-FSE-TLAERGATLSYIPCLNASDA  | 306 |
| sp | Q8P3H6 | HEMH_XANCP  | VRSFDLVC PGFATDCLETLEEVALG-FAE-TLAERGATLSYIPCLNDSTT  | 306 |
| sp | Q9PFU1 | HEMH_XYLFA  | IRRFDLVC PGFVSDCLETLEEVALG-FSE-TLAARGATMRYIPCLNDDEPA | 306 |
| sp | Q87B82 | HEMH_XYLFT  | IRRFDLVC PGFVSDCLETLEEVALG-FSE-TLAARGATMRYIPCLNDDEPA | 306 |
| sp | Q607T4 | HEMH_METCA  | IRHVDVVC PGFVADLETLEEIAIANRNE-FLGAGGKNRYRYIPALNASPA  | 308 |
| sp | Q8U9F7 | HEMH_AGR5   | IKRIAVMNP GFVSDCLETLEEIAGEAGEI-FLHNGGKEFTHIPCLNDSTE  | 327 |
| sp | Q92M52 | HEMH_RHIME  | VKRIAVINP GFVSDCLETLEEIAGQAAES-FHHNGGKEFAHIPCLNDSPE  | 322 |
| sp | Q93TG2 | HEMH_BRUME  | VKSAVAVLNP GFVADLETVEIGNEAAEE-FLENGGENFSHIPCLNDSEE   | 335 |
| sp | Q98H61 | HEMH_RHILO  | VKSIAIVNPGFVSDCIETLDEIGREAAET-FHHAGGKNFAHIPCLNDSAE   | 336 |
| sp | P28602 | HEMH_BRAJA  | VRIAVVTPGFAADCLETLEEIAQENAEI-FKHNGGEQFSAIPCLNDSEP    | 328 |
| sp | Q6NBF3 | HEMH_RHOPA  | VKNLAVMNP GFVSDCLETLEEIAQENAEI-FMEHGGEFTAIIPCLNDSDA  | 328 |
| sp | Q59735 | HEMH_RHOCA  | KKNIAVISP AFVSDCIETLEEINGEIREA-FEHAGGESFTYVPCLNDDDL  | 333 |
| sp | P57779 | HEMH_ZYMMO  | IRNLAVAMP GFVSDCLETLEEIALQKST-FLEAGGENFAALRCLNDSEE   | 313 |
| sp | Q833G5 | HEMH_ENTFA  | IKNILIVAP GFVVDLETLEELEHENRNY-FLENGGEVYKYVHPFNGDIE   | 302 |
| sp | Q9CFB4 | HEMH_LACLA  | AKKVLICSPAFVADLETLEFELEIENKEV-FVENGGETFDFVHPFNDSLD   | 300 |
| sp | Q67T48 | HEMH_SYMTH  | HRHVAVMAPGFAADCIETLHELEVEYAEF-FVKAGGERYDYLPAANDHPL   | 305 |

|    |        |             |                                                     |     |
|----|--------|-------------|-----------------------------------------------------|-----|
| sp | Q88XC3 | HEMH_LACPL  | KRNVLVVTPSFVVDCLLETLEEDYVQNYQT-FRASGGDRFDLVPMPNKDTG | 298 |
| sp | P57778 | HEMH_PSEFL  | VKKLLVMCPAFVADCIETLEEIGDRGLEQ-FREAGGEELVLPCLNDDPQ   | 324 |
| sp | Q888A2 | HEMH_PSESM  | VKKLLVMCPAFVADCIETLEEIGDRGAEQ-FKEAGGEELILVPCLNDDPN  | 324 |
| sp | Q88PV4 | HEMH_PSEPK  | VKKLLVMCPAFVADCIETLEEIGMRGSEQ-FVEAGGQELVLPCLNDHPE   | 326 |
| sp | Q9HVD7 | HEMH_PSEAE  | VKRLLMCPAFVADCIETLEEIGMRGREQ-FISAGGEDLVLPCLNDHPA    | 324 |
| sp | Q6MHT3 | HEMH_BDEBA  | KKNIAVICPSFVADCIETLEEIGIGGQET-FHEHGGDQYLLVPCVNDNPK  | 323 |
| sp | Q83FA4 | HEMH_COXBU  | IKKLMVVCPSFPVDCLETLEEIGIRAQSQ-WORLDGETLKLIPSLNAHPQ  | 327 |
| sp | Q6MAW8 | HEMH_PARUW  | RKKILVFCPAFVDCLETTEEVSIEYAE-EFKHLGGDTLHLVEGLNSHPV   | 325 |
| sp | Q7MXP4 | HEMH_PORGI  | TKRILIACPSFVDCLESLLEEVADHGQSI-FKKAGGADFTYIPCLNSGAN  | 334 |
| sp | Q824K8 | HEMH_CHLCV  | -KHLVIVPFGFTSDHIETLYEIEKEYIAV-LIDKG-YQALRVPAIYQSSP  | 295 |
| sp | Q9Z7V1 | HEMH_CHLPN  | -PNVIVVPFGFISDHLETLYEIERDYLP-LRSRG-YRALRIPAIYSSPL   | 296 |
| sp | Q9PJQ6 | HEMH_CHLMU  | -RYIVVVPFGFVSDHIETLYEIDHLYVPM-LLQRG-YRVVRIPAINSTR   | 290 |
| sp | O84492 | HEMH_CHLTR  | -RYIVIVPFGFVSDHIETLHEIDHLYVPI-LLQKG-YRVVRIPAINASSR  | 290 |
| sp | Q8GCV0 | HEMH_LEPBI  | -KHIAVYIPISFVSDHIETLEEIGEQFKDL-TWEMGGKSFVRIPALGIYPS | 326 |
| sp | Q81U22 | HEMH1_BACAN | YTSFVYAPVGFVAEHLEVLVDNDFECKVV--TDEIGAKYYRPEMPNASDA  | 294 |
| sp | Q6HM97 | HEMH1_BACHK | YTSFVYAPVGFVAEHLEVLVDNDFECKVV--TDEIGAKYYRPEMPNASDA  | 294 |
| sp | Q63ES4 | HEMH1_BACCZ | YTSFVYAPVGFVAEHLEVLVDNDFECKVV--TDEIGAKYYRPEMPNASDA  | 294 |
| sp | Q73C98 | HEMH1_BACC1 | YTSFVYAPVGFVAEHLEVLVDNDFECKVV--TDEIGAKYYRPEMPNASDA  | 294 |
| sp | Q81GW5 | HEMH1_BACCR | YTSFVYAPVGFVAEHLEVLVDNDFECKVV--TDEIGAKYYRPEMPNASDA  | 294 |
| sp | P32396 | HEMH_BACSU  | YQAFVYVPGFVADHLEVLVDNDFECKVV--TDDIGASYRPEMPNAKPE    | 295 |
| sp | Q8ERX9 | HEMH_OCEIH  | YKAFIYTPVGFVADHLEVLVDNDFECKVV--CDEIGASYRDPMPNVHPE   | 294 |
| sp | Q71XF4 | HEMH_LISMF  | YKHFYIYTPVGFVAEHLEVLVDNDFECKVV--TDEVGATYHRPPMPNSDPE | 294 |
| sp | Q8Y565 | HEMH_LISMO  | YKHFYIYTPVGFVAEHLEVLVDNDFECKVV--TDEVGAAHYRPPMPNSDPE | 294 |
| sp | Q929G2 | HEMH_LISIN  | YKHFYIYTPVGFVAEHLEVLVDNDFECKVV--TDEVGAAHYRPPMPNADPE | 294 |
| sp | P64124 | HEMH_STAAM  | YKNFIYTPVGFVCEHLEVLVDNDFECKVV--CDDIGANYRPKMPNTHPL   | 294 |
| sp | P64125 | HEMH_STAAN  | YKNFIYTPVGFVCEHLEVLVDNDFECKVV--CDDIGANYRPKMPNTHPL   | 294 |
| sp | Q6G8A3 | HEMH_STAAS  | YKNFIYTPVGFVCEHLEVLVDNDFECKVV--CDDIGANYRPKMPNTHPL   | 294 |
| sp | P64126 | HEMH_STAAN  | YKNFIYTPVGFVCEHLEVLVDNDFECKVV--CDDIGANYRPKMPNTHPL   | 294 |
| sp | Q6GFM4 | HEMH_STAAR  | YKNFIYTPVGFVCEHLEVLVDNDFECKVV--CDDIGANYRPKMPNTHPL   | 294 |
| sp | Q8CNS1 | HEMH_STAEP  | FKHFYIYTPVGFVCEHLEVLVDNDFECKVV--CDDIGVNYRPEMPNTHPL  | 294 |
| sp | Q81TU9 | HEMH2_BACAN | YESFIYCPVGFVAEHLEVLVDNDFECKVV--TDELNAAYFRPNMPNAQST  | 293 |
| sp | Q6HM28 | HEMH2_BACHK | YESFIYCPVGFVAEHLEVLVDNDFECKVV--TDELNAAYFRPNMPNAQST  | 293 |
| sp | Q63EK7 | HEMH2_BACCZ | YEAFIYCPVGFVAEHLEVLVDNDFECKVV--TDELNAAYFRPNMPNAQST  | 293 |
| sp | Q73C08 | HEMH2_BACC1 | YESFIYCPVGFVAEHLEVLVDNDFECKVV--TDEINAAYFRPNMPNSQSI  | 293 |
| sp | Q81GN7 | HEMH2_BACCR | YESFIYCPVGFVAEHLEVLVDNDFECKVV--TDELNAKYFRPNMPNAQSA  | 293 |
| sp | Q9KDK9 | HEMH_BACHD  | YTSMIYCPVGFVADHLEVLVDNDFECKVV--TDELGIDYRPEMPNAKPE   | 293 |
| sp | Q5WHT1 | HEMH_BACSK  | YKTFMYCPVGFVAEHLEVLVDNDFECKLV--TDELGVRYLRRPMPNADTR  | 293 |
| sp | Q72L32 | HEMH_THET2  | YEEVAVQAVGFVADHLEVLVDNDFECKLV--ARELGLRLLRARSLNADLD  | 302 |
| sp | Q9RV98 | HEMH_DEIRA  | IKKVVSIAGFVSDHVEILFDIDIAAQEV--AHELGMTLVRPPALNTDPL   | 299 |
| sp | Q97R30 | HEMH_STRPN  | PDHYIFVPISEHIEVLFVDFNDVECYDL--CQEFVNYHRPPMPNTDSR    | 281 |
| sp | Q8DQ04 | HEMH_STRR6  | PDHYIFVPISEHIEVLFVDFNDVECYDL--CQEFVNYHRPPMPNTDSR    | 281 |
| sp | Q8FTB1 | HEMH_COREF  | QKALVVCVGFISDHMEVWDLDELMDE--ATRRGMVIERVATVGPSTDE    | 313 |
| sp | Q8NQA1 | HEMH_CORGL  | QKALVVCVGFISDHMEVWDLDELMDE--AEKRMVVERVATVGPSTDE     | 307 |
| sp | Q6NH66 | HEMH_CORDI  | VSELVVPVIGFISDHMEVWDLDELMDE--ASDLGMSISRAATVGHSTDS   | 317 |
| sp | Q740Y1 | HEMH_MYCPA  | TRAVIVCPVGFVADHIEVWDLDEELRAQ--AESAGMLMARASTPNAQPR   | 286 |
| sp | P71765 | HEMH_MYCTU  | INAVIVCPVGFVADHIEVWDLDEELRLQ--AEAAGIAYARASTPNADPR   | 286 |
| sp | Q9CBM2 | HEMH_MYCLE  | TKAVIVCPVGFVADHIEVWDLDEELRSQ--ADAAGVAFARAATPNADRR   | 290 |
| sp | Q5YU18 | HEMH_NOCHA  | VDAVVVCPVGFVSDHLEVLVDNDFECKVV--AAELGMFAFARASTPGTDP  | 300 |
| sp | O07401 | HEMH_MYCAV  | TRAVIVCPVGFVADHIEVWDLDEELRAQ--AESAGMLMARASTPNAQPR   | 285 |
| sp | Q83H94 | HEMH_TROW8  | CEAVLIVPLGFISDHMEVWDLDELMDE--ARECGLFAIRTPPTPGTHPL   | 336 |
| sp | Q83FJ2 | HEMH_TROWT  | CEAVLIVPLGFISDHMEVWDLDELMDE--ARECGLFAIRTPPTPGTHPL   | 336 |
| sp | Q6AHF2 | HEMH_LEIXX  | VKAIIVPLGFVSDHMEVWDLDELMDE--SEENGLLAVRVPPTPGTHAK    | 334 |
| sp | Q82KJ6 | HEMH_STRAW  | VPAVVMAPVGFVSDHMEVWDLDELMDE--AEELGLPVRRSATVGDAR     | 317 |
| sp | O50533 | HEMH_STRCO  | VPAVVMAPVGFVSDHMEVWDLDELMDE--AEELGLPVRRSATVGDAR     | 317 |
| sp | Q7UFZ7 | HEMH_RHOBA  | LESVLVPLVIGFVSDHMEVWDLDELMDE--CRERGIKMARASAAGTHPD   | 296 |
| sp | P72183 | HEMH_PROFR  | VRDVICSPVGFVSDHMEVWDLDELMDE--AAEHSMAFTRVATVGTLPV    | 298 |
| sp | Q9HLB8 | HEMH_THEAC  | --KITVPIPSFLYDHLIYLDLDFEYFRKA--VEAKGMHYRRVMPNDSAM   | 270 |
| sp | Q978U9 | HEMH_THEVO  | --KIIAVPIPSFLYDHLIYLDLDFEYFRKA--IEEDGYSYERVPMPNDSAM | 272 |

\* : \*

|    |        |             |                                          |     |
|----|--------|-------------|------------------------------------------|-----|
| sp | P42043 | HEMH1_ARATH | FITDLADAVIESLPSA-----EAMSNPNAVVDSESE--   | 432 |
| sp | P42044 | HEMH_CUUSA  | FISDLADAVIEALPSA-----TALAPHTSSTDDADD---- | 455 |
| sp | P42045 | HEMH_HORVU  | FISDLADAVVEALPSA-----SAMATRKKVKTDSDD---- | 449 |

|    |        |             |                                                     |     |
|----|--------|-------------|-----------------------------------------------------|-----|
| sp | O04921 | HEMH2_ARATH | FISDLADAVVESLPYVGAMAVSNLEARQSLVPLGVSVEELLATYDSQRREL | 461 |
| sp | O22101 | HEMH_ORYSA  | FITDLADAVIESLPYVGAMAVSNLEARQLVPLGVSVEELLAAYDSKRDEL  | 442 |
| sp | Q8YQR8 | HEMH_ANASP  | FIRALADLVIDALNKP-----SFKLSQAAQIKKMVKMYPPE-----      | 346 |
| sp | P54225 | HEMH_SYNY3  | FIDALAQMVMSLNDP-----PCTFETVPHPKKNMKMYPQER---        | 346 |
| sp | Q8DGU6 | HEMH_SYNEL  | FISALAQLVKEALAAP-----PRTFAEVNQSRKRKVKLYPQER---      | 347 |
| sp | Q7VD58 | HEMH_PROMA  | FINGLADLVASCLSGP-----EISLDEAAKLPEKVKLYPQEK---       | 350 |
| sp | Q7V2F5 | HEMH_PROMP  | FIDGLSELVVSCLEGP-----IINIEKASELPEKVKLYPQEK---       | 350 |
| sp | Q7V6C6 | HEMH_PROMM  | FIEGLADLVGSSLEGP-----EINLDEAAKLAGRVKVFYPQER---      | 350 |
| sp | Q7U5G0 | HEMH_SYNPX  | FIEGLADLVTTSLGEP-----EVSLDAAAELPTKVKLYPQEK---       | 350 |
| sp | Q7NMC7 | HEMH_GLOVI  | FIDDLAEMVIENLG-----VYSR-----                        | 327 |
| sp | Q9ZC84 | HEMH_RICPR  | FINSLTNILLRFIN-----                                 | 313 |
| sp | Q68VM9 | HEMH_RICTY  | FINSLTNILLRFIN-----                                 | 313 |
| sp | Q92FV4 | HEMH_RICCN  | FINSLTNILLRFIN-----                                 | 313 |
| sp | Q73FY6 | HEMH_WOLPM  | FIKCLADLCINLP-----                                  | 315 |
| sp | P57777 | HEMH_CAUCR  | FIDGLAKAVRDSVG-----                                 | 318 |
| sp | O67083 | HEMH_AQUAE  | FISALEDLVKNEV-----                                  | 309 |
| sp | P22830 | HEMH_HUMAN  | FSKALADLVHSHIQSNEL---                               | 394 |
| sp | P22315 | HEMH_MOUSE  | FSKALADLVHSHIQSNKL-----                             | 391 |
| sp | P22600 | HEMH_BOVIN  | FSKALADLVHSHLQSKER-----                             | 387 |
| sp | O42479 | HEMH_CHICK  | FSKALADLVCSHIQSNEI-----                             | 373 |
| sp | O57478 | HEMH_XENLA  | FSKALADLVLSHMKSSEI-----                             | 381 |
| sp | Q9V9S8 | HEMH_DROME  | FIDALTNVVADHLKSQQA-----                             | 354 |
| sp | O59786 | HEMH_SCHPO  | AIQGMADLVAEHLKAKVP-----                             | 357 |
| sp | P16622 | HEMH_YEAST  | FIEGMADLVKSHLQSNQL---                               | 362 |
| sp | Q6APB0 | HEMH_DESPS  | FITGLRQLVLESSVNSD-----                              | 320 |
| sp | Q747F5 | HEMH_GEOSL  | FISCLADLVRR--VEG-----                               | 317 |
| sp | Q9ZKD4 | HEMH_HELPJ  | FAKFIIELVKN---LKSE-----                             | 335 |
| sp | P56107 | HEMH_HELPY  | FAQFIIERVKN---LKE-----                              | 334 |
| sp | Q7M7P9 | HEMH_WOLSU  | FAHAI IKLISQ---GEIS-----                            | 316 |
| sp | Q7VHH1 | HEMH_HELHP  | FAKSIMNILEEHLRGKAEV-----                            | 311 |
| sp | Q9PI08 | HEMH_CAMJE  | FMEFILKYLSD---LN-----                               | 303 |
| sp | Q8DFM2 | HEMH_VIBVU  | HIEMMARLVTER-----                                   | 319 |
| sp | Q7MMR4 | HEMH_VIBVY  | HIEMMARLVTER-----                                   | 319 |
| sp | Q9KT6  | HEMH_VIBCH  | HIELMAALVKVDC-----                                  | 320 |
| sp | Q87RH3 | HEMH_VIBPA  | HIDMMAELVRSKL-----                                  | 320 |
| sp | Q6LTE0 | HEMH_PHOPR  | HIRMMKNLVTQHSQGW-----                               | 322 |
| sp | Q8EFF4 | HEMH1_SHEON | HIELLRLLVQEQTQSWISAE-----                           | 348 |
| sp | Q8XD39 | HEMH_ECO57  | HIEMMANLVAAYR-----                                  | 320 |
| sp | P23871 | HEMH_ECOLI  | HIEMMANLVAAYR-----                                  | 320 |
| sp | Q8FK83 | HEMH_ECOL6  | HIEMMANLVAAYR-----                                  | 320 |
| sp | Q83SE5 | HEMH_SHIFL  | HIEMMANLVAAYR-----                                  | 320 |
| sp | Q8Z8T2 | HEMH_SALTI  | HIDMILKLTAPYR-----                                  | 320 |
| sp | P37408 | HEMH_SALTY  | HIDMMLKLTAPYR-----                                  | 320 |
| sp | Q8ZC98 | HEMH_YERPE  | HIALLEQLIRHNI-----                                  | 320 |
| sp | Q05338 | HEMH_YERPS  | HIALLEQLIRHNI-----                                  | 320 |
| sp | P43413 | HEMH_YEREN  | HIDLLEQLVRDHLSC-----                                | 322 |
| sp | Q6D7Z4 | HEMH_ERWCT  | HIDLLEQLVGKVE-----                                  | 320 |
| sp | Q7N0P6 | HEMH_PHOLL  | HILLLEELVNGFVRNRDE-----                             | 325 |
| sp | P43868 | HEMH_HAEIN  | HIEMMGKILILEKLT-----                                | 323 |
| sp | P57874 | HEMH_PASMU  | HIQMMANLILNKLNTQTSK---                              | 326 |
| sp | Q65SV7 | HEMH_MANSM  | HIACLGNNLLKRMITI-----                               | 323 |
| sp | Q8CWW4 | HEMH_STRMU  | HIQLLAELISERL-----                                  | 319 |
| sp | Q8D226 | HEMH_WIGBR  | HIECLANIIRTHLK-----                                 | 321 |
| sp | Q8EBZ7 | HEMH2_SHEON | HIAMMANLVKPYL-----                                  | 327 |
| sp | Q6F7N0 | HEMH_ACIAAD | HLELLRQLLQAHLDALNYSLAYSAAH-----                     | 340 |
| sp | Q7WGI0 | HEMH_BORBR  | WIEGLTDLVERQLRGWPTGNP-----                          | 362 |
| sp | Q7W515 | HEMH_BORPA  | WIEGLTDLVERQLRGWPTGNP---                            | 362 |
| sp | Q7VVX8 | HEMH_BORPE  | WIEGLTDLVERQLRGWPTGNP-----                          | 362 |
| sp | Q62HD1 | HEMH_BURMA  | WIAALGEIAAENLQGW-----VRVAMAPEAVS-----               | 367 |
| sp | Q63R43 | HEMH_BURPS  | WIAALGEIAAENLQGW-----VRVAMAPEAVS-----               | 367 |
| sp | Q8XW32 | HEMH_RALSO  | WIAGLADIAQAHLQGWPLALPHPHVLEASRTAQSKGAAA-----        | 371 |
| sp | Q7NV65 | HEMH_CHRVO  | WISSLAGIVRNNLAGWTEIR-AEDSQQR-AALAHDMGASA-----       | 364 |
| sp | Q82UK8 | HEMH_NITEU  | WIEAIGNIIQTHLTGWADRRRLSEEAERSRKRALALGARE-----       | 364 |



|    |        |             |                                                          |     |
|----|--------|-------------|----------------------------------------------------------|-----|
| sp | Q9JVA5 | HEMH_NEIMA  | WIDALVALAEENLGGWR-----                                   | 336 |
| sp | Q9K097 | HEMH_NEIMB  | WIDALVALAEENLGSWR-----                                   | 336 |
| sp | Q8PEX0 | HEMH_XANAC  | HAHALAAMARRA-----                                        | 318 |
| sp | Q8P3H6 | HEMH_XANCP  | HAQALAAVARRA-----                                        | 318 |
| sp | Q9PFU1 | HEMH_XYLFA  | HVQALAGLAQRALL-----                                      | 320 |
| sp | Q87B82 | HEMH_XYLFT  | HVQALAGLAQRALP-----                                      | 320 |
| sp | Q607T4 | HEMH_METCA  | HADILIGLLEPYLALTA-----                                   | 325 |
| sp | Q8U9F7 | HEMH_AGRT5  | GMNVLEKVVRRRELQGWV-----                                  | 344 |
| sp | Q92M52 | HEMH_RHIME  | GMAVLNHVVRRELEGWL-----                                   | 339 |
| sp | Q93TG2 | HEMH_BRUME  | GMKVIETLVRRELLGWV-----                                   | 352 |
| sp | Q98H61 | HEMH_RHILO  | GMTVIEAMVRRELSGWV-----                                   | 353 |
| sp | P28602 | HEMH_BRAJA  | GMDVIRTLVLRRELQGWI-----                                  | 345 |
| sp | Q6NBF3 | HEMH_RHOPA  | GVQVIRQLVLRRELQGWL-----                                  | 345 |
| sp | Q59735 | HEMH_RHOCA  | HIAALLEVVEENLAGWID-----                                  | 351 |
| sp | P57779 | HEMH_ZYMMO  | SLAMLEILVNQGLYGWLKSWE-----                               | 334 |
| sp | Q833G5 | HEMH_ENTFA  | FAKLVKDIISL-----                                         | 313 |
| sp | Q9CFB4 | HEMH_LACLA  | FTRVLSEVVDQNRL-----                                      | 314 |
| sp | Q67T48 | HEMH_SYMTH  | FIDCLEDLVRRHLPR-----                                     | 320 |
| sp | Q88XC3 | HEMH_LACPL  | FSQFLADLAIQKQEASNHAITSSSKS-----                          | 324 |
| sp | P57778 | HEMH_PSEFL  | WAVALNTLCERAPVSL-----                                    | 340 |
| sp | Q888A2 | HEMH_PSESM  | WAKELNRLCERAPLML-----                                    | 340 |
| sp | Q88PV4 | HEMH_PSEPK  | WVRVLADMCEKA-----                                        | 338 |
| sp | Q9HVD7 | HEMH_PSEAE  | WVGALAEMSGRLARPL-----                                    | 340 |
| sp | Q6MHT3 | HEMH_BDEBA  | WVQGFADLVKSI-----                                        | 335 |
| sp | Q83FA4 | HEMH_COXBU  | WVNIAIAKMAKKSLLQLF-----                                  | 343 |
| sp | Q6MAW8 | HEMH_PARUW  | WIEAIKTIIQEHLPHPHSQFSR-----                              | 347 |
| sp | Q7MXP4 | HEMH_PORGI  | WIDALRNILEE-----                                         | 345 |
| sp | Q824K8 | HEMH_CHLCV  | WVESLATIIQSTPHVEKKSLIKS-----                             | 318 |
| sp | Q927V1 | HEMH_CHLPN  | WVSTLVDIVKENSTVVAEELIKSGKKHTGIR-----                     | 327 |
| sp | Q9PJQ6 | HEMH_CHLMU  | WVSALASIVKSSPHETILEPLLMKRR-----                          | 317 |
| sp | O84492 | HEMH_CHLTR  | WVSSLAAIVRSSPQETSLEPLLM-----                             | 314 |
| sp | Q8GCV0 | HEMH_LEPBI  | FIQFLAEKVMHSDRKHQHCICREKGGESLQHCRFKD-----                | 362 |
| sp | Q81U22 | HEMH1_BACAN | FIDCLTDVVVKKKESVM-----                                   | 311 |
| sp | Q6HM97 | HEMH1_BACHK | FIDCLTDVVVKKKESVM-----                                   | 311 |
| sp | Q63ES4 | HEMH1_BACCZ | FIDSLTDVVVKKKESVM-----                                   | 311 |
| sp | Q73C98 | HEMH1_BACC1 | FIDCLTDVVLKKKESVL-----                                   | 311 |
| sp | Q81GW5 | HEMH1_BACCR | FIDCLTDVVLKKKESVL-----                                   | 311 |
| sp | P32396 | HEMH_BACSU  | FIDALATVVLKKLGR-----                                     | 310 |
| sp | Q8ERX9 | HEMH_OCEIH  | FIETLANVVMKKAKSEVR-----                                  | 312 |
| sp | Q71XF4 | HEMH_LISMF  | FLEVLRTVVWEKYSN-----                                     | 309 |
| sp | Q8Y565 | HEMH_LISMO  | FLEVLRTVVWEKYSN-----                                     | 309 |
| sp | Q929G2 | HEMH_LISIN  | FLEVLRTVVWDAYTK-----                                     | 309 |
| sp | P64124 | HEMH_STAAM  | FIGAIVDEIKSIF-----                                       | 307 |
| sp | P64125 | HEMH_STAAN  | FIGAIVDEIKSIF-----                                       | 307 |
| sp | Q6G8A3 | HEMH_STAAS  | FIGAIVDEIKSIF-----                                       | 307 |
| sp | P64126 | HEMH_STAAW  | FIGAIVDEIKSIF-----                                       | 307 |
| sp | Q6GFM4 | HEMH_STAAR  | FIGAIVDEIKSIF-----                                       | 307 |
| sp | Q8CNS1 | HEMH_STAEP  | FIGAIVDEIQSHI-----                                       | 307 |
| sp | Q81TU9 | HEMH2_BACAN | FIDCLATIVSRKMKEIVDKELILNNN-----                          | 319 |
| sp | Q6HM28 | HEMH2_BACHK | FIDCLATIVSRKMKEIVDKELILNNN-----                          | 319 |
| sp | Q63EK7 | HEMH2_BACCZ | FIDCLATIVSKMKKEIVDKELILNNN-----                          | 319 |
| sp | Q73C08 | HEMH2_BACC1 | FIDCLTEIVSKMKKEVVDKDLVLNNN-----                          | 319 |
| sp | Q81GN7 | HEMH2_BACCR | FIDCLAEIVSKKVKEIVDKDLVLNNN-----                          | 319 |
| sp | Q9KDK9 | HEMH_BACHD  | FIDCLATVIQKKLAEKE-----                                   | 310 |
| sp | Q5WHT1 | HEMH_BACSK  | FLKALADVVTKRLAAAVTK-----                                 | 312 |
| sp | Q72L32 | HEMH_THET2  | YIQVLKDLVEAAWPR-----                                     | 317 |
| sp | Q9RV98 | HEMH_DEIRA  | FIGTLASVIERKAAEVA-----                                   | 316 |
| sp | Q97R30 | HEMH_STRPN  | LIDALVNTVRVNNENQEFKEFLPEEETFDELVPSDETKNILAESQDLQMPE----- | 331 |
| sp | Q8DQ04 | HEMH_STRR6  | LIDALVNTVRVNNENQEFKEFLPEEETFDELVPSDETKNILAESEDLQMPE----- | 331 |
| sp | Q8FTB1 | HEMH_COREF  | FATMVVDLIDEMEMKRVIERLG---TLPVRGSTVNGEPCVPGCCAPRRRP-----  | 360 |
| sp | Q8NQA1 | HEMH_CORGL  | FAALVVDLIEEAEKRVIERLG---KLPARGSSVNGAPCGDGCCTAKHK-----    | 354 |
| sp | Q6NH66 | HEMH_CORDI  | FATMIVELVEESLGVKPHQNLG---TVPSKGCSTFNGEPCVNCCKPVQRP-----  | 364 |
| sp | Q740Y1 | HEMH_MYCPA  | FARLAADLIDELRCGRTPARVTGPDPVPGCLASVNGAPCRPPHCAAQATG-----  | 336 |

|    |        |             |                                                      |     |
|----|--------|-------------|------------------------------------------------------|-----|
| sp | P71765 | HEMH_MYCTU  | FARLARGLIDELRYGRIPARVSGPDPVPGCLSSINGQPCRPPHCVASVSP   | 336 |
| sp | Q9CBM2 | HEMH_MYCLE  | FARLAASLIDELTHDRVVVRVNGSDPVPGLASINGVPCDLPHCVA----    | 336 |
| sp | Q5YU18 | HEMH_NOCAFA | FPRLVVELMREHLDGLAPRRLG---AEPGYGCTIDGMPGASGCCAPQRRP   | 347 |
| sp | O07401 | HEMH_MYCAV  | FGRLAADLIDELRCGRTPARVTGPDQVPGLASVNGAPCRPPHCAAQATG    | 335 |
| sp | Q83H94 | HEMH_TROW8  | YISGMVDLIVERLEGVPRSA-----RPAMTDLGPWFVDCQPGCCCKNSRSG  | 381 |
| sp | Q83FJ2 | HEMH_TROWT  | YISGMVDLIVERLEGVPRSA-----RPAMTDLGPWFVDCQPGCCCKNSRSG  | 381 |
| sp | Q6AHF2 | HEMH_LEIXX  | YVKGLVDLVLERRDGLPVAQ-----RPSLTTLGPWYDVCRPGCCENVRLG   | 379 |
| sp | Q82KJ6 | HEMH_STRAW  | FAAAVRELVVERRAAVESGQKVT---PCALGALGSPHQVCPVGCPCPARAP- | 363 |
| sp | O50533 | HEMH_STRCO  | FAAAVRDLVLERAGDERGQEVV---PCALGTLGASHNLCPVGCPCPARAP-  | 363 |
| sp | Q7UFZ7 | HEMH_RHOBA  | FVEMICGLVQERLGLKNEK-----PALGELGPWHDVCPQDCCLYTPR-     | 338 |
| sp | P72183 | HEMH_PROFR  | FIEGLADLIVAALSTKPGTG-----PDAPAARHWCTPDCCPNARIA       | 339 |
| sp | Q9HLB8 | HEMH_THEAC  | MVNMIERAARSATHLSGEK-----INGSIIGQPRIADTDNG            | 307 |
| sp | Q978U9 | HEMH_THEVO  | FITLLERIVSSSITHLSGEL-----IGN---GKEKSENFII--          | 304 |

|    |        |             |                                                      |     |
|----|--------|-------------|------------------------------------------------------|-----|
| sp | P42043 | HEMH1_ARATH | -----SSDAFSYIVKMFPG--SILAFVLLLSPKMFHAFRN--L-----     | 466 |
| sp | P42044 | HEMH_CUCSA  | -----HDPFLYAIIKLLFG--SVLAFI LLLSPKAFMVFRRNNFLLNYTRI  | 496 |
| sp | P42045 | HEMH_HORVU  | -----MDMMHYLTKMFLG--SVLAFFLLSPRLVSAFRNTLQ-----       | 484 |
| sp | O04921 | HEMH2_ARATH | PAPVTMWEWGWTKSAETWNGRAAMLAVLALLVLEVTGKGFHLQWGIPLS    | 511 |
| sp | O22101 | HEMH_ORYSA  | PPPVTVWEWGWTKSAETWNGRAAMLAVLALLVLEVTGEGFHLQWGIPL     | 492 |
| sp | Q8YQR8 | HEMH_ANASP  | -----WEWGMTSSAEVWNGRIAMLGFIALLII--ELVTGQGLLHMIGLLQ-  | 388 |
| sp | P54225 | HEMH_SYNY3  | -----WEWGLTTAAEVWNGRLAMLGFIALLV--ELISGQGPLHFVGLL--   | 387 |
| sp | Q8DGU6 | HEMH_SYNEL  | -----WEWGMTSAAERWNGRLAMLGFIALLMI--ELISGQGPLHMLGLL--  | 388 |
| sp | Q7VD58 | HEMH_PROMA  | -----WQGWNNNSAEVWNGRVAMFVFIICFF--ELVINGPLHYIGLL--    | 391 |
| sp | Q7V2F5 | HEMH_PROMP  | -----WQGWNNNSSEVWNGRVAMIVFLILFI--ELISGSGPLHKLGLL--   | 391 |
| sp | Q7V6C6 | HEMH_PROMM  | -----WQWGLNTSSEAWNGRIAMLGFAAFLL--ELISGHGPHLHAIGLL--  | 391 |
| sp | Q7U5G0 | HEMH_SYNPX  | -----WEWGWNNNSSEVWNGRLAMLGFSAFLL--ELISGHGPHLHALGLL-- | 391 |
| sp | Q7NMC7 | HEMH_GLOVI  | -----                                                |     |
| sp | Q9ZC84 | HEMH_RICPR  | -----NTNTNLVMSSSSKRICPNKFTKCLCNLTN-----              | 342 |
| sp | Q68VM9 | HEMH_RICTY  | -----KTDTNLVMSSSSKRICPNKFTKCLCNLIN-----              | 342 |
| sp | Q92FV4 | HEMH_RICCN  | -----KVDTNLVMSSSSSTRICPNEFTKCLCKLTS-----             | 342 |
| sp | Q73FY6 | HEMH_WOLPM  | -----                                                |     |
| sp | P57777 | HEMH_CAUCR  | -----KAPG--TVSSACGWRCGADWSKPCPCREGASA--              | 347 |
| sp | O67083 | HEMH_AQUAE  | -----                                                |     |
| sp | P22830 | HEMH_HUMAN  | -----CSKQLTLSCPLCV-NPVCRETKSFFTSQQL-----             | 423 |
| sp | P22315 | HEMH_MOUSE  | -----CSTQLSLNCPCLCV-NPVCRTKTSFFTSQQL-----            | 420 |
| sp | P22600 | HEMH_BOVIN  | -----CSTQLTLSCPLCV-NPTCRETKSFFTSQQL-----             | 416 |
| sp | O42479 | HEMH_CHICK  | -----CSKQLTLCCPLCV-NPVCRETKAFFTNQQL-----             | 402 |
| sp | O57478 | HEMH_XENLA  | -----CSKQLSLRCPMCV-NPVCGEAKSFFTKQQQ-----             | 411 |
| sp | Q9V9S8 | HEMH_DROME  | -----VNPKFLMRCPMCS-NPKCRESKSWYRQLCSN-----            | 384 |
| sp | O59786 | HEMH_SCHPO  | -----YSRQFTQRCPGCT-SESCAERINFFQDF-----               | 384 |
| sp | P16622 | HEMH_YEAST  | -----YSNQLPLDFALGKSNPDKDLSLVFGNHEST-----             | 393 |
| sp | Q6APB0 | HEMH_DESPS  | -----                                                |     |
| sp | Q747F5 | HEMH_GEOSL  | -----                                                |     |
| sp | Q9ZKD4 | HEMH_HELPJ  | -----                                                |     |
| sp | P56107 | HEMH_HELPY  | -----                                                |     |
| sp | Q7M7P9 | HEMH_WOLSU  | -----                                                |     |
| sp | Q7VHH1 | HEMH_HELHP  | -----                                                |     |
| sp | Q9PI08 | HEMH_CAMJE  | -----                                                |     |
| sp | Q8DFM2 | HEMH_VIBVU  | -----                                                |     |
| sp | Q7MMR4 | HEMH_VIBVY  | -----                                                |     |
| sp | Q9KT6  | HEMH_VIBCH  | -----                                                |     |
| sp | Q87RH3 | HEMH_VIBPA  | -----                                                |     |
| sp | Q6LTE0 | HEMH_PHOPR  | -----                                                |     |
| sp | Q8EFF4 | HEMH1_SHEON | -----                                                |     |
| sp | Q8XD39 | HEMH_ECO57  | -----                                                |     |
| sp | P23871 | HEMH_ECOLI  | -----                                                |     |
| sp | Q8FK83 | HEMH_ECOL6  | -----                                                |     |
| sp | Q83SE5 | HEMH_SHIFL  | -----                                                |     |
| sp | Q8Z8T2 | HEMH_SALTI  | -----                                                |     |
| sp | P37408 | HEMH_SALTY  | -----                                                |     |
| sp | Q8ZC98 | HEMH_YERPE  | -----                                                |     |
| sp | Q05338 | HEMH_YERPS  | -----                                                |     |

|    |        |             |       |
|----|--------|-------------|-------|
| sp | P43413 | HEMH_YEREN  | ----- |
| sp | Q6D7Z4 | HEMH_ERWCT  | ----- |
| sp | Q7N0P6 | HEMH_PHOLL  | ----- |
| sp | P43868 | HEMH_HAEIN  | ----- |
| sp | P57874 | HEMH_PASMU  | ----- |
| sp | Q65SV7 | HEMH_MANSM  | ----- |
| sp | Q8CWW4 | HEMH_STRMU  | ----- |
| sp | Q8D226 | HEMH_WIGBR  | ----- |
| sp | Q8EBZ7 | HEMH2_SHEON | ----- |
| sp | Q6F7N0 | HEMH_ACIAD  | ----- |
| sp | Q7WGI0 | HEMH_BORBR  | ----- |
| sp | Q7W515 | HEMH_BORPA  | ----- |
| sp | Q7VVX8 | HEMH_BORPE  | ----- |
| sp | Q62HD1 | HEMH_BURMA  | ----- |
| sp | Q63R43 | HEMH_BURPS  | ----- |
| sp | Q8XW32 | HEMH_RALSO  | ----- |
| sp | Q7NV65 | HEMH_CHRVO  | ----- |
| sp | Q82UK8 | HEMH_NITEU  | ----- |
| sp | Q9JVA5 | HEMH_NEIMA  | ----- |
| sp | Q9K097 | HEMH_NEIMB  | ----- |
| sp | Q8PEX0 | HEMH_XANAC  | ----- |
| sp | Q8P3H6 | HEMH_XANCP  | ----- |
| sp | Q9PFU1 | HEMH_XYLFA  | ----- |
| sp | Q87B82 | HEMH_XYLFT  | ----- |
| sp | Q607T4 | HEMH_METCA  | ----- |
| sp | Q8U9F7 | HEMH_AGRT5  | ----- |
| sp | Q92M52 | HEMH_RHIME  | ----- |
| sp | Q93TG2 | HEMH_BRUME  | ----- |
| sp | Q98H61 | HEMH_RHILO  | ----- |
| sp | P28602 | HEMH_BRAJA  | ----- |
| sp | Q6NBF3 | HEMH_RHOPA  | ----- |
| sp | Q59735 | HEMH_RHOCA  | ----- |
| sp | P57779 | HEMH_ZYMMO  | ----- |
| sp | Q833G5 | HEMH_ENTFA  | ----- |
| sp | Q9CFB4 | HEMH_LACLA  | ----- |
| sp | Q67T48 | HEMH_SYMTH  | ----- |
| sp | Q88XC3 | HEMH_LACPL  | ----- |
| sp | P57778 | HEMH_PSEFL  | ----- |
| sp | Q888A2 | HEMH_PSESM  | ----- |
| sp | Q88PV4 | HEMH_PSEPK  | ----- |
| sp | Q9HVD7 | HEMH_PSEAE  | ----- |
| sp | Q6MHT3 | HEMH_BDEBA  | ----- |
| sp | Q83FA4 | HEMH_COXBU  | ----- |
| sp | Q6MAW8 | HEMH_PARUW  | ----- |
| sp | Q7MXP4 | HEMH_PORGI  | ----- |
| sp | Q824K8 | HEMH_CHLCV  | ----- |
| sp | Q9Z7V1 | HEMH_CHLPN  | ----- |
| sp | Q9PJQ6 | HEMH_CHLMU  | ----- |
| sp | Q84492 | HEMH_CHLTR  | ----- |
| sp | Q8GCV0 | HEMH_LEPBI  | ----- |
| sp | Q81U22 | HEMH1_BACAN | ----- |
| sp | Q6HM97 | HEMH1_BACHK | ----- |
| sp | Q63ES4 | HEMH1_BACCZ | ----- |
| sp | Q73C98 | HEMH1_BACC1 | ----- |
| sp | Q81GW5 | HEMH1_BACCR | ----- |
| sp | P32396 | HEMH_BACSU  | ----- |
| sp | Q8ERX9 | HEMH_OCEIH  | ----- |
| sp | Q71XF4 | HEMH_LISMF  | ----- |
| sp | Q8Y565 | HEMH_LISMO  | ----- |
| sp | Q929G2 | HEMH_LISIN  | ----- |
| sp | P64124 | HEMH_STAAM  | ----- |
| sp | P64125 | HEMH_STAAN  | ----- |
| sp | Q6G8A3 | HEMH_STAAS  | ----- |

|    |        |             |                                         |     |
|----|--------|-------------|-----------------------------------------|-----|
| sp | P64126 | HEMH_STAAW  | -----                                   |     |
| sp | Q6GFM4 | HEMH_STAAR  | -----                                   |     |
| sp | Q8CNS1 | HEMH_STAEP  | -----                                   |     |
| sp | Q81TU9 | HEMH2_BACAN | -----                                   |     |
| sp | Q6HM28 | HEMH2_BACHK | -----                                   |     |
| sp | Q63EK7 | HEMH2_BACCZ | -----                                   |     |
| sp | Q73C08 | HEMH2_BACC1 | -----                                   |     |
| sp | Q81GN7 | HEMH2_BACCR | -----                                   |     |
| sp | Q9KDK9 | HEMH_BACHD  | -----                                   |     |
| sp | Q5WHT1 | HEMH_BACSK  | -----                                   |     |
| sp | Q72L32 | HEMH_THET2  | -----                                   |     |
| sp | Q9RV98 | HEMH_DEIRA  | -----                                   |     |
| sp | Q97R30 | HEMH_STRPN  | FVKKLIIEKKGRENVKMPYLIKKMLEKAGKLPKE----- | 364 |
| sp | Q8DQ04 | HEMH_STRR6  | FVKKLIIEKKGRENVKMPYLIKKMLEKAGKLPKE----- | 364 |
| sp | Q8FTB1 | HEMH_COREF  | AASQTNPNADAPVASRS-----                  | 377 |
| sp | Q8NQA1 | HEMH_CORGL  | TA-RVNPNARSAAPAAAN-----                 | 370 |
| sp | Q6NH66 | HEMH_CORDI  | HS-----AKA-----                         | 369 |
| sp | Q740Y1 | HEMH_MYCPA  | -----                                   |     |
| sp | P71765 | HEMH_MYCTU  | AR-----PSAGSP-----                      | 344 |
| sp | Q9CBM2 | HEMH_MYCLE  | -----                                   |     |
| sp | Q5YU18 | HEMH_NOCFA  | AA-----AGR-----                         | 352 |
| sp | O07401 | HEMH_MYCAV  | -----                                   |     |
| sp | Q83H94 | HEMH_TROW8  | FKPAYGGVAP-----                         | 391 |
| sp | Q83FJ2 | HEMH_TROWT  | FKPAYGGVAP-----                         | 391 |
| sp | Q6AHF2 | HEMH_LEIXX  | FKPAVAGLTP-----                         | 389 |
| sp | Q82KJ6 | HEMH_STRAW  | -KPAAGADSPYA-----                       | 375 |
| sp | O50533 | HEMH_STRCO  | -RPAAGADSPYA-----                       | 375 |
| sp | Q7UFZ7 | HEMH_RHOBA  | -RPPVAGGRPVQAN-----                     | 351 |
| sp | P72183 | HEMH_PROFR  | GRPTIPGFAAGPR-----                      | 352 |
| sp | Q9HLB8 | HEMH_THEAC  | R-----                                  | 308 |
| sp | Q978U9 | HEMH_THEVO  | -----                                   |     |

|    |        |             |                    |     |
|----|--------|-------------|--------------------|-----|
| sp | P42043 | HEMH1_ARATH | -----              |     |
| sp | P42044 | HEMH_CUCSA  | YGYRGERSEFFWVRLIFT | 514 |
| sp | P42045 | HEMH_HORVU  | -----              |     |
| sp | O04921 | HEMH2_ARATH | L-----             | 512 |
| sp | O22101 | HEMH_ORYSA  | FH-----            | 494 |
| sp | Q8YQR8 | HEMH_ANASP  | -----              |     |
| sp | P54225 | HEMH_SYNY3  | -----              |     |
| sp | Q8DGU6 | HEMH_SYNEL  | -----              |     |
| sp | Q7VD58 | HEMH_PROMA  | -----              |     |
| sp | Q7V2F5 | HEMH_PROMP  | -----              |     |
| sp | Q7V6C6 | HEMH_PROMM  | -----              |     |
| sp | Q7U5G0 | HEMH_SYNPX  | -----              |     |
| sp | Q7NMC7 | HEMH_GLOVI  | -----              |     |
| sp | Q9ZC84 | HEMH_RICPR  | -----              |     |
| sp | Q68VM9 | HEMH_RICTY  | -----              |     |
| sp | Q92FV4 | HEMH_RICCN  | -----              |     |
| sp | Q73FY6 | HEMH_WOLPM  | -----              |     |
| sp | P57777 | HEMH_CAUCR  | -----              |     |
| sp | O67083 | HEMH_AQUAE  | -----              |     |
| sp | P22830 | HEMH_HUMAN  | -----              |     |
| sp | P22315 | HEMH_MOUSE  | -----              |     |
| sp | P22600 | HEMH_BOVIN  | -----              |     |
| sp | O42479 | HEMH_CHICK  | -----              |     |
| sp | O57478 | HEMH_XENLA  | -----              |     |
| sp | Q9V9S8 | HEMH_DROME  | -----              |     |
| sp | O59786 | HEMH_SCHPO  | -----              |     |
| sp | P16622 | HEMH_YEAST  | -----              |     |
| sp | Q6APB0 | HEMH_DESPS  | -----              |     |
| sp | Q747F5 | HEMH_GEOSL  | -----              |     |
| sp | Q9ZKD4 | HEMH_HELPJ  | -----              |     |

|    |        |             |       |
|----|--------|-------------|-------|
| sp | P56107 | HEMH_HELPHY | ----- |
| sp | Q7M7P9 | HEMH_WOLSU  | ----- |
| sp | Q7VHH1 | HEMH_HELHP  | ----- |
| sp | Q9PI08 | HEMH_CAMJE  | ----- |
| sp | Q8DFM2 | HEMH_VIBVU  | ----- |
| sp | Q7MMR4 | HEMH_VIBVY  | ----- |
| sp | Q9KTB6 | HEMH_VIBCH  | ----- |
| sp | Q87RH3 | HEMH_VIBPA  | ----- |
| sp | Q6LTE0 | HEMH_PHOPR  | ----- |
| sp | Q8EFF4 | HEMH1_SHEON | ----- |
| sp | Q8XD39 | HEMH_ECO57  | ----- |
| sp | P23871 | HEMH_ECOLI  | ----- |
| sp | Q8FK83 | HEMH_ECOL6  | ----- |
| sp | Q83SE5 | HEMH_SHIFL  | ----- |
| sp | Q8Z8T2 | HEMH_SALTI  | ----- |
| sp | P37408 | HEMH_SALTY  | ----- |
| sp | Q8ZC98 | HEMH_YERPE  | ----- |
| sp | Q05338 | HEMH_YERPS  | ----- |
| sp | P43413 | HEMH_YEREN  | ----- |
| sp | Q6D7Z4 | HEMH_ERWCT  | ----- |
| sp | Q7N0P6 | HEMH_PHOLL  | ----- |
| sp | P43868 | HEMH_HAEIN  | ----- |
| sp | P57874 | HEMH_PASMU  | ----- |
| sp | Q65SV7 | HEMH_MANSM  | ----- |
| sp | Q8CWW4 | HEMH_STRMU  | ----- |
| sp | Q8D226 | HEMH_WIGBR  | ----- |
| sp | Q8EBZ7 | HEMH2_SHEON | ----- |
| sp | Q6F7N0 | HEMH_ACIAD  | ----- |
| sp | Q7WGI0 | HEMH_BORBR  | ----- |
| sp | Q7W515 | HEMH_BORPA  | ----- |
| sp | Q7VVX8 | HEMH_BORPE  | ----- |
| sp | Q62HD1 | HEMH_BURMA  | ----- |
| sp | Q63R43 | HEMH_BURPS  | ----- |
| sp | Q8XW32 | HEMH_RALSO  | ----- |
| sp | Q7NV65 | HEMH_CHRVO  | ----- |
| sp | Q82UK8 | HEMH_NITEU  | ----- |
| sp | Q9JVA5 | HEMH_NEIMA  | ----- |
| sp | Q9K097 | HEMH_NEIMB  | ----- |
| sp | Q8PEX0 | HEMH_XANAC  | ----- |
| sp | Q8P3H6 | HEMH_XANCP  | ----- |
| sp | Q9PFU1 | HEMH_XYLFA  | ----- |
| sp | Q87B82 | HEMH_XYLFT  | ----- |
| sp | Q607T4 | HEMH_METCA  | ----- |
| sp | Q8U9F7 | HEMH_AGRT5  | ----- |
| sp | Q92M52 | HEMH_RHIME  | ----- |
| sp | Q93TG2 | HEMH_BRUME  | ----- |
| sp | Q98H61 | HEMH_RHILO  | ----- |
| sp | P28602 | HEMH_BRAJA  | ----- |
| sp | Q6NBF3 | HEMH_RHOPA  | ----- |
| sp | Q59735 | HEMH_RHOCA  | ----- |
| sp | P57779 | HEMH_ZYMMO  | ----- |
| sp | Q833G5 | HEMH_ENTFA  | ----- |
| sp | Q9CFB4 | HEMH_LACLA  | ----- |
| sp | Q67T48 | HEMH_SYMTH  | ----- |
| sp | Q88XC3 | HEMH_LACPL  | ----- |
| sp | P57778 | HEMH_PSEFL  | ----- |
| sp | Q888A2 | HEMH_PSESM  | ----- |
| sp | Q88PV4 | HEMH_PSEPK  | ----- |
| sp | Q9HVD7 | HEMH_PSEAE  | ----- |
| sp | Q6MHT3 | HEMH_BDEBA  | ----- |
| sp | Q83FA4 | HEMH_COXBU  | ----- |
| sp | Q6MAW8 | HEMH_PARUW  | ----- |
| sp | Q7MXP4 | HEMH_PORGI  | ----- |

|    |        |             |       |
|----|--------|-------------|-------|
| sp | Q824K8 | HEMH_CHLCV  | ----- |
| sp | Q9Z7V1 | HEMH_CHLPN  | ----- |
| sp | Q9PJQ6 | HEMH_CHLMU  | ----- |
| sp | O84492 | HEMH_CHLTR  | ----- |
| sp | Q8GCV0 | HEMH_LEPBI  | ----- |
| sp | Q81U22 | HEMH1_BACAN | ----- |
| sp | Q6HM97 | HEMH1_BACHK | ----- |
| sp | Q63ES4 | HEMH1_BACCZ | ----- |
| sp | Q73C98 | HEMH1_BACC1 | ----- |
| sp | Q81GW5 | HEMH1_BACCR | ----- |
| sp | P32396 | HEMH_BACSU  | ----- |
| sp | Q8ERX9 | HEMH_OCEIH  | ----- |
| sp | Q71XF4 | HEMH_LISMF  | ----- |
| sp | Q8Y565 | HEMH_LISMO  | ----- |
| sp | Q929G2 | HEMH_LISIN  | ----- |
| sp | P64124 | HEMH_STAAM  | ----- |
| sp | P64125 | HEMH_STAAN  | ----- |
| sp | Q6G8A3 | HEMH_STAAS  | ----- |
| sp | P64126 | HEMH_STAAN  | ----- |
| sp | Q6GFM4 | HEMH_STAAR  | ----- |
| sp | Q8CNS1 | HEMH_STAEP  | ----- |
| sp | Q81TU9 | HEMH2_BACAN | ----- |
| sp | Q6HM28 | HEMH2_BACHK | ----- |
| sp | Q63EK7 | HEMH2_BACCZ | ----- |
| sp | Q73C08 | HEMH2_BACC1 | ----- |
| sp | Q81GN7 | HEMH2_BACCR | ----- |
| sp | Q9KDK9 | HEMH_BACHD  | ----- |
| sp | Q5WHT1 | HEMH_BACSK  | ----- |
| sp | Q72L32 | HEMH_THET2  | ----- |
| sp | Q9RV98 | HEMH_DEIRA  | ----- |
| sp | Q97R30 | HEMH_STRPN  | ----- |
| sp | Q8DQ04 | HEMH_STRR6  | ----- |
| sp | Q8FTB1 | HEMH_COREF  | ----- |
| sp | Q8NQA1 | HEMH_CORGL  | ----- |
| sp | Q6NH66 | HEMH_CORDI  | ----- |
| sp | Q740Y1 | HEMH_MYCPA  | ----- |
| sp | P71765 | HEMH_MYCTU  | ----- |
| sp | Q9CBM2 | HEMH_MYCLE  | ----- |
| sp | Q5YU18 | HEMH_NOCFB  | ----- |
| sp | O07401 | HEMH_MYCAV  | ----- |
| sp | Q83H94 | HEMH_TROW8  | ----- |
| sp | Q83FJ2 | HEMH_TROWT  | ----- |
| sp | Q6AHF2 | HEMH_LEIXX  | ----- |
| sp | Q82KJ6 | HEMH_STRAW  | ----- |
| sp | O50533 | HEMH_STRCO  | ----- |
| sp | Q7UFZ7 | HEMH_RHOBA  | ----- |
| sp | P72183 | HEMH_PROFR  | ----- |
| sp | Q9HLB8 | HEMH_THEAC  | ----- |
| sp | Q978U9 | HEMH_THEVO  | ----- |

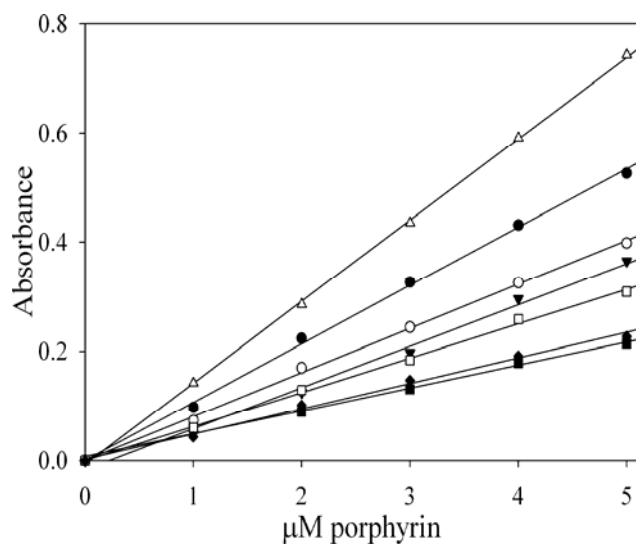

**Supplemental data Figure 2. Standard curves for determination of apparent extinction coefficients of protoporphyrin IX and metallated porphyrins in ferrochelatase reaction buffer.** The apparent extinction coefficients were: zinc protoporphyrin IX (triangles); 149,000 L/(mol·cm) at 417 nm, protoporphyrin IX (filled circles); 107,000 L/(mol·cm) at 407 nm, protoporphyrin IX (circles); 80,500 L/(mol·cm) at 417 nm, cobalt protoporphyrin IX (filled triangles); 75,400 L/(mol·cm) at 407 nm, copper protoporphyrin IX (squares); 62,600 L/(mol·cm) at 417 nm, iron protoporphyrin IX (filled triangles); 41,500 L/(mol·cm) at 407 nm, and nickel protoporphyrin IX (filled squares); 41,900 L/(mol·cm) at 417 nm. Data were collected at 30°C.

**Supplemental data Figure 3. Spectral characterization of transition metal ion insertion into protoporphyrin IX catalyzed by ferrochelatase.** 0.1  $\mu\text{M}$  yeast ferrochelatase was incubated with 5  $\mu\text{M}$  protoporphyrin IX and 10  $\mu\text{M}$  of the indicated divalent transition metal (as the chloride salt) at 30°C in ferrochelatase reaction buffer. Spectra were recorded at regular intervals until the reaction reached completion. Arrows indicate the direction of spectral changes during the transformation of protoporphyrin IX into each of the various metalloporphyrins.

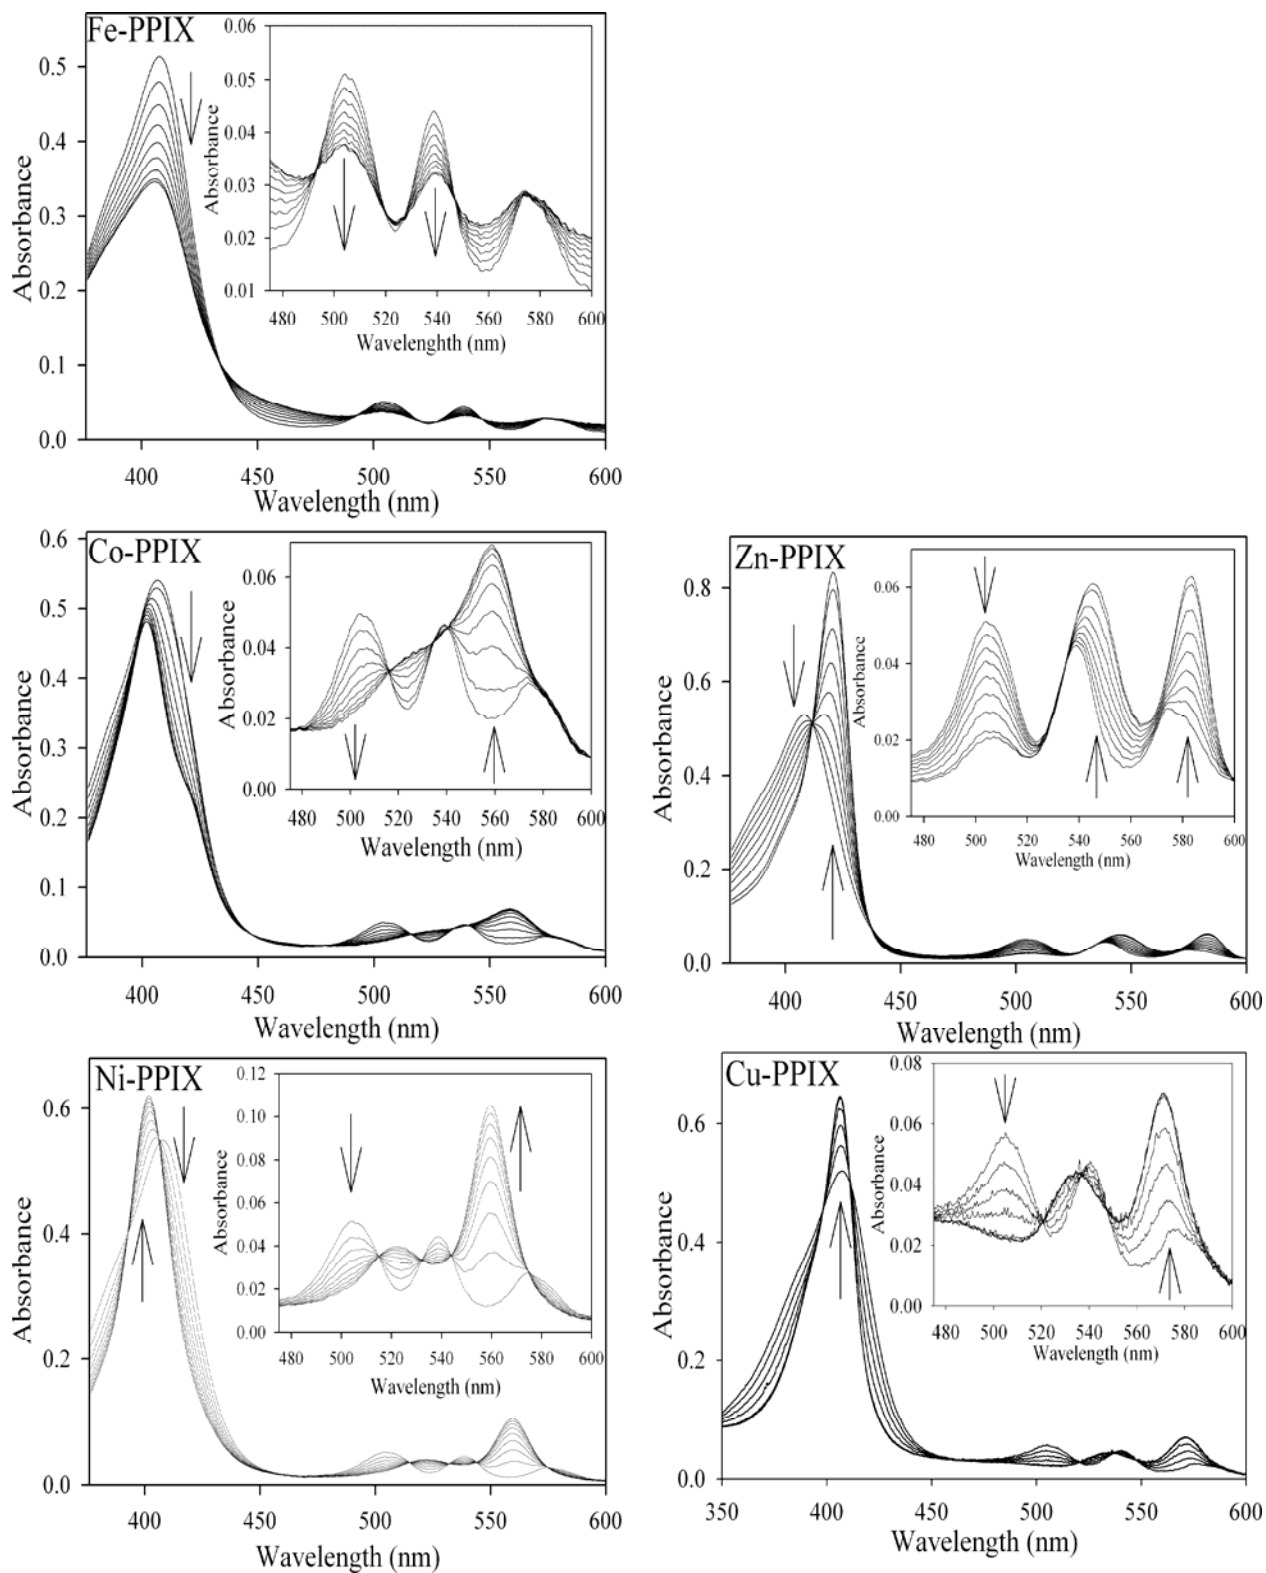

Supplement: supp_M803372200_SupplementalData_060908.pdf [file supp_M803372200_SupplementalData_060908.pdf]
